# Supplementary material
Source: PubMed Central journal article supplement (PMC4844722)
Supplement: JCM.02897-15_zjm999094965so1.pdf [file JCM.02897-15_zjm999094965so1.pdf]

**Table S1. List of the 2415 genes present in the five *eae*-positive, *stx*-negative O157 isolates that were subjected to whole genome sequencing.** The locus tags of the reference sequence of *E. coli* O157:H7 strain Sakai (GenBank accession number NC\_002695), the gene product, the absolute position in the genome, and the gene length in bp were given.

| <b>Locus tag</b> | <b>Product</b>                                                                   | <b>Genome localization in strain Sakai (NC_002695)</b> | <b>Gene length in bp</b> |
|------------------|----------------------------------------------------------------------------------|--------------------------------------------------------|--------------------------|
| ECs0002          | bifunctional aspartokinase I/homoserine dehydrogenase I                          | 354                                                    | 2463                     |
| ECs0003          | homoserine kinase                                                                | 2818                                                   | 933                      |
| ECs0004          | threonine synthase                                                               | 3751                                                   | 1287                     |
| ECs0006          | hypothetical protein                                                             | 5700                                                   | 777                      |
| ECs0007          | inner membrane transport protein                                                 | 6546                                                   | 1431                     |
| ECs0008          | transaldolase B                                                                  | 8255                                                   | 954                      |
| ECs0009          | molybdenum cofactor biosynthesis protein MogA                                    | 9323                                                   | 588                      |
| ECs0010          | hypothetical protein                                                             | 9945                                                   | 567                      |
| ECs0012          | hypothetical protein                                                             | 10660                                                  | 714                      |
| ECs0013          | hypothetical protein                                                             | 11399                                                  | 405                      |
| ECs0014          | molecular chaperone DnaK                                                         | 12180                                                  | 1917                     |
| ECs0017          | pH-dependent sodium/proton antiporter                                            | 16157                                                  | 1167                     |
| ECs0026          | 30S ribosomal protein S20                                                        | 25220                                                  | 264                      |
| ECs0029          | isoleucyl-tRNA synthetase                                                        | 26802                                                  | 2817                     |
| ECs0030          | lipoprotein signal peptidase                                                     | 29618                                                  | 495                      |
| ECs0031          | FKBP-type peptidyl-prolyl cis-trans isomerase                                    | 30200                                                  | 450                      |
| ECs0032          | 4-hydroxy-3-methylbut-2-enyl diphosphate reductase                               | 30651                                                  | 951                      |
| ECs0034          | dihydrodipicolinate reductase                                                    | 32748                                                  | 822                      |
| ECs0035          | carbamoyl phosphate synthase small subunit                                       | 34025                                                  | 1149                     |
| ECs0036          | carbamoyl phosphate synthase large subunit                                       | 35191                                                  | 3222                     |
| ECs0037          | CaiF family transcriptional regulator                                            | 38673                                                  | 396                      |
| ECs0039          | carnitiny-CoA dehydratase                                                        | 39783                                                  | 786                      |
| ECs0041          | crotonobetainyl-CoA:carnitine CoA-transferase                                    | 42304                                                  | 1218                     |
| ECs0042          | crotonobetainyl-CoA dehydrogenase                                                | 43650                                                  | 1143                     |
| ECs0043          | L-carnitine/gamma-butyrobetaine antiporter                                       | 44823                                                  | 1515                     |
| ECs0044          | electron transfer flavoprotein FixA                                              | 46816                                                  | 771                      |
| ECs0045          | electron transfer flavoprotein FixB                                              | 47601                                                  | 942                      |
| ECs0046          | oxidoreductase FixC                                                              | 48593                                                  | 1287                     |
| ECs0047          | ferredoxin                                                                       | 49876                                                  | 288                      |
| ECs0048          | transporter                                                                      | 50221                                                  | 1332                     |
| ECs0049          | glutathione-regulated potassium-efflux system ancillary protein Keff             | 51660                                                  | 531                      |
| ECs0050          | glutathione-regulated potassium-efflux system protein KefC                       | 52183                                                  | 1863                     |
| ECs0051          | dihydrofolate reductase                                                          | 54237                                                  | 480                      |
| ECs0055          | ApaG protein                                                                     | 56204                                                  | 378                      |
| ECs0056          | dimethyladenosine transferase                                                    | 56584                                                  | 822                      |
| ECs0057          | 4-hydroxythreonine-4-phosphate dehydrogenase                                     | 57402                                                  | 990                      |
| ECs0058          | peptidyl-prolyl cis-trans isomerase SurA                                         | 58391                                                  | 1287                     |
| ECs0059          | organic solvent tolerance protein                                                | 59730                                                  | 2355                     |
| ECs0060          | Dna-J like membrane chaperone protein                                            | 62339                                                  | 816                      |
| ECs0062          | 23S rRNA/tRNA pseudouridine synthase A                                           | 64619                                                  | 660                      |
| ECs0065          | L-ribulose-5-phosphate 4-epimerase                                               | 70786                                                  | 696                      |
| ECs0066          | L-arabinose isomerase                                                            | 71681                                                  | 1503                     |
| ECs0067          | ribulokinase                                                                     | 73194                                                  | 1701                     |
| ECs0069          | hypothetical protein                                                             | 76197                                                  | 765                      |
| ECs0072          | thiamine transporter substrate binding subunit                                   | 79316                                                  | 984                      |
| ECs0075          | isopropylmalate isomerase small subunit                                          | 83455                                                  | 606                      |
| ECs0076          | isopropylmalate isomerase large subunit                                          | 84071                                                  | 1401                     |
| ECs0077          | 3-isopropylmalate dehydrogenase                                                  | 85474                                                  | 1092                     |
| ECs0078          | 2-isopropylmalate synthase                                                       | 86565                                                  | 1572                     |
| ECs0079          | leu operon leader peptide                                                        | 88229                                                  | 87                       |
| ECs0082          | acetolactate synthase 3 regulatory subunit                                       | 91962                                                  | 492                      |
| ECs0084          | DNA-binding transcriptional regulator FruR                                       | 92633                                                  | 1005                     |
| ECs0085          | cell division protein MraZ                                                       | 94239                                                  | 459                      |
| ECs0086          | S-adenosyl-methyltransferase MraW                                                | 94699                                                  | 942                      |
| ECs0087          | cell division protein FtsL                                                       | 95637                                                  | 366                      |
| ECs0088          | hypothetical protein                                                             | 96018                                                  | 1767                     |
| ECs0089          | UDP-N-acetylmuramoylalanyl-D-glutamate--2, 6-diaminopimelate ligase              | 97771                                                  | 1488                     |
| ECs0090          | UDP-N-acetylmuramoyl-tripeptide--D-alanyl-D- alanine ligase                      | 99255                                                  | 1359                     |
| ECs0091          | phospho-N-acetylmuramoyl-pentapeptide- transferase                               | 100607                                                 | 1083                     |
| ECs0092          | UDP-N-acetylmuramoyl-L-alanyl-D-glutamate synthetase                             | 101692                                                 | 1317                     |
| ECs0093          | cell division protein FtsW                                                       | 103008                                                 | 1245                     |
| ECs0094          | undecaprenyldiphospho-muramoylpentapeptide beta-N- acetylglucosaminyltransferase | 104249                                                 | 1068                     |
| ECs0095          | UDP-N-acetylmuramate--L-alanine ligase                                           | 105370                                                 | 1476                     |
| ECs0096          | D-alanine--D-alanine ligase                                                      | 106838                                                 | 921                      |
| ECs0097          | cell division protein FtsQ                                                       | 107760                                                 | 831                      |
| ECs0098          | cell division protein FtsA                                                       | 108587                                                 | 1263                     |
| ECs0099          | cell division protein FtsZ                                                       | 109910                                                 | 1152                     |
| ECs0100          | UDP-3-O-[3-hydroxymyristoyl] N-acetylglucosamine deacetylase                     | 111162                                                 | 918                      |
| ECs0101          | SecA regulator SecM                                                              | 112310                                                 | 513                      |
| ECs0102          | preprotein translocase subunit SecA                                              | 112884                                                 | 2706                     |

|         |                                                                   |        |      |
|---------|-------------------------------------------------------------------|--------|------|
| ECs0103 | nucleoside triphosphate pyrophosphohydrolase                      | 115649 | 399  |
| ECs0105 | zinc-binding protein                                              | 116138 | 198  |
| ECs0106 | hypothetical protein                                              | 116345 | 744  |
| ECs0107 | dephospho-CoA kinase                                              | 117088 | 621  |
| ECs0108 | guanosine 5'-monophosphate oxidoreductase                         | 117933 | 1044 |
| ECs0110 | type IV pilin biogenesis protein                                  | 119011 | 1203 |
| ECs0112 | major pilin subunit                                               | 121598 | 441  |
| ECs0114 | N-acetyl-anhydromuranmyl-L-alanine amidase                        | 123222 | 552  |
| ECs0115 | regulatory protein AmpE                                           | 123770 | 855  |
| ECs0116 | aromatic amino acid transporter                                   | 124667 | 1374 |
| ECs0117 | transcriptional regulator PdhR                                    | 126581 | 765  |
| ECs0118 | pyruvate dehydrogenase subunit E1                                 | 127506 | 2664 |
| ECs0119 | dihydrolipoamide acetyltransferase                                | 130184 | 1893 |
| ECs0120 | dihydrolipoamide dehydrogenase                                    | 132284 | 1425 |
| ECs0122 | bifunctional aconitate hydratase 2/2-methylisocitrate dehydratase | 135987 | 2598 |
| ECs0123 | hypothetical protein                                              | 138760 | 363  |
| ECs0124 | S-adenosylmethionine decarboxylase                                | 139160 | 795  |
| ECs0125 | spermidine synthase                                               | 139970 | 867  |
| ECs0126 | hypothetical protein                                              | 140942 | 348  |
| ECs0127 | multicopper oxidase                                               | 141455 | 1551 |
| ECs0128 | glucose dehydrogenase                                             | 143207 | 2391 |
| ECs0130 | carbonic anhydrase                                                | 146380 | 663  |
| ECs0132 | hypothetical protein                                              | 148074 | 771  |
| ECs0134 | hypothetical protein                                              | 149453 | 1230 |
| ECs0135 | aspartate alpha-decarboxylase                                     | 150686 | 381  |
| ECs0137 | pantoate--beta-alanine ligase                                     | 152535 | 852  |
| ECs0138 | 3-methyl-2-oxobutanoate hydroxymethyltransferase                  | 153398 | 795  |
| ECs0147 | poly(A) polymerase                                                | 162051 | 1419 |
| ECs0148 | glutamyl-Q tRNA(Asp) synthetase                                   | 163508 | 897  |
| ECs0149 | RNA polymerase-binding transcription factor                       | 164471 | 456  |
| ECs0150 | sugar fermentation stimulation protein A                          | 165104 | 705  |
| ECs0151 | 2'-5' RNA ligase                                                  | 165823 | 531  |
| ECs0152 | ATP-dependent RNA helicase HrpB                                   | 166382 | 2475 |
| ECs0153 | penicillin-binding protein 1b                                     | 169052 | 2535 |
| ECs0155 | iron-hydroxamate transporter ATP-binding protein                  | 174100 | 798  |
| ECs0156 | iron-hydroxamate transporter substrate-binding subunit            | 174897 | 891  |
| ECs0160 | iron-sulfur cluster insertion protein ErpA                        | 180809 | 345  |
| ECs0161 | hypothetical protein                                              | 181200 | 624  |
| ECs0162 | vitamin B12-transporter protein BtuF                              | 181861 | 801  |
| ECs0163 | 5'-methylthioadenosine/S-adenosylhomocysteine nucleosidase        | 182654 | 699  |
| ECs0165 | serine endoprotease                                               | 185083 | 1425 |
| ECs0166 | carbohydrate diacid transcriptional activator CdaR                | 186662 | 1158 |
| ECs0167 | hypothetical protein                                              | 187908 | 387  |
| ECs0168 | 2,3,4,5-tetrahydropyridine-2,6-carboxylate N-succinyltransferase  | 188609 | 825  |
| ECs0169 | P11 uridylyl-transferase                                          | 189464 | 2673 |
| ECs0170 | methionine aminopeptidase                                         | 192198 | 795  |
| ECs0171 | 30S ribosomal protein S2                                          | 193360 | 726  |
| ECs0172 | elongation factor Ts                                              | 194343 | 852  |
| ECs0173 | uridylylase kinase                                                | 195341 | 726  |
| ECs0174 | ribosome recycling factor                                         | 196216 | 558  |
| ECs0175 | 1-deoxy-D-xylulose 5-phosphate reductoisomerase                   | 196865 | 1197 |
| ECs0176 | undecaprenyl pyrophosphate synthase                               | 198247 | 762  |
| ECs0177 | CDP-diglyceride synthase                                          | 199021 | 858  |
| ECs0178 | zinc metallopeptidase RseP                                        | 199890 | 1353 |
| ECs0179 | outer membrane protein assembly factor YaeT                       | 201272 | 2433 |
| ECs0180 | periplasmic chaperone                                             | 203825 | 486  |
| ECs0181 | UDP-3-O-[3-hydroxymyristoyl] glucosamine N-acyltransferase        | 204314 | 1026 |
| ECs0182 | (3R)-hydroxymyristoyl-ACP dehydratase                             | 205444 | 456  |
| ECs0183 | UDP-N-acetylglucosamine acyltransferase                           | 205903 | 789  |
| ECs0184 | lipid-A-disaccharide synthase                                     | 206691 | 1149 |
| ECs0185 | ribonuclease H11                                                  | 207836 | 597  |
| ECs0186 | DNA polymerase III subunit alpha                                  | 208469 | 3483 |
| ECs0187 | acetyl-CoA carboxylase carboxyltransferase subunit alpha          | 211964 | 960  |
| ECs0188 | lysine decarboxylase 2                                            | 213022 | 2142 |
| ECs0189 | hypothetical protein                                              | 215220 | 390  |
| ECs0191 | Rho-binding antiterminator                                        | 217022 | 261  |
| ECs0192 | hypothetical protein                                              | 217635 | 459  |
| ECs0194 | lipoprotein involved with copper homeostasis and adhesion         | 218601 | 711  |
| ECs0196 | prolyl-tRNA synthetase                                            | 220388 | 1719 |
| ECs0197 | hypothetical protein                                              | 222217 | 708  |
| ECs0198 | outer membrane lipoprotein                                        | 222921 | 405  |
| ECs0199 | DL-methionine transporter substrate-binding subunit               | 223443 | 816  |
| ECs0201 | DL-methionine transporter ATP-binding protein                     | 224944 | 1032 |
| ECs0203 | 2,5-diketo-D-gluconate reductase B                                | 232496 | 804  |
| ECs0204 | transcriptional regulator                                         | 233296 | 915  |
| ECs0205 | hypothetical protein                                              | 234451 | 801  |
| ECs0208 | hydroxyacylglutathione hydrolase                                  | 237577 | 756  |

|         |                                                                                                       |        |      |
|---------|-------------------------------------------------------------------------------------------------------|--------|------|
| ECs0209 | hypothetical protein                                                                                  | 238348 | 741  |
| ECs0210 | ribonuclease H                                                                                        | 239085 | 468  |
| ECs0247 | C-lysozyme inhibitor                                                                                  | 278411 | 474  |
| ECs0248 | acyl-CoA dehydrogenase                                                                                | 278927 | 2445 |
| ECs0249 | phosphoheptose isomerase                                                                              | 281611 | 579  |
| ECs0250 | amidotransferase                                                                                      | 282294 | 768  |
| ECs0251 | hypothetical protein                                                                                  | 283032 | 741  |
| ECs0256 | hypothetical protein                                                                                  | 287928 | 786  |
| ECs0258 | DNA polymerase IV                                                                                     | 288784 | 1056 |
| ECs0263 | peptide chain release factor-like protein                                                             | 291589 | 501  |
| ECs0265 | xanthine-guanine phosphoribosyltransferase                                                            | 293864 | 459  |
| ECs0266 | fermentation/respiration switch protein                                                               | 294414 | 1245 |
| ECs0267 | DNA-binding transcriptional regulator Crl                                                             | 295716 | 402  |
| ECs0269 | gamma-glutamyl kinase                                                                                 | 297499 | 1104 |
| ECs0270 | gamma-glutamyl phosphate reductase                                                                    | 298614 | 1254 |
| ECs0398 | lac repressor                                                                                         | 423204 | 1092 |
| ECs0409 | nucleoprotein/polynucleotide-associated enzyme                                                        | 434970 | 540  |
| ECs0410 | esterase                                                                                              | 435634 | 834  |
| ECs0411 | alcohol dehydrogenase                                                                                 | 436560 | 1110 |
| ECs0412 | regulator protein FrmR                                                                                | 437704 | 297  |
| ECs0419 | taurine transporter substrate binding subunit                                                         | 446234 | 963  |
| ECs0421 | taurine transporter subunit                                                                           | 447973 | 828  |
| ECs0422 | taurine dioxygenase                                                                                   | 448797 | 852  |
| ECs0423 | delta-aminolevulinic acid dehydratase                                                                 | 449755 | 975  |
| ECs0425 | DNA-binding transcriptional regulator                                                                 | 454240 | 669  |
| ECs0426 | beta-lactam binding protein AmpH                                                                      | 454909 | 1158 |
| ECs0429 | hypothetical protein                                                                                  | 458804 | 309  |
| ECs0430 | hypothetical protein                                                                                  | 459240 | 345  |
| ECs0431 | D-alanyl-alanine synthetase A                                                                         | 459608 | 1095 |
| ECs0432 | hypothetical protein                                                                                  | 461165 | 261  |
| ECs0436 | hypothetical protein                                                                                  | 465543 | 459  |
| ECs0437 | pyrroline-5-carboxylate reductase                                                                     | 464614 | 810  |
| ECs0438 | shikimate kinase                                                                                      | 466184 | 525  |
| ECs0439 | hypothetical protein                                                                                  | 466758 | 192  |
| ECs0440 | hypothetical protein                                                                                  | 467207 | 678  |
| ECs0441 | hypothetical protein                                                                                  | 467956 | 285  |
| ECs0445 | recombination associated protein                                                                      | 471194 | 912  |
| ECs0446 | MFS transport protein AraJ                                                                            | 473281 | 1269 |
| ECs0447 | exonuclease SbcC                                                                                      | 474591 | 3144 |
| ECs0448 | exonuclease SbcD                                                                                      | 477731 | 1203 |
| ECs0449 | transcriptional regulator PhoB                                                                        | 479123 | 690  |
| ECs0450 | phosphate regulon sensor protein                                                                      | 479870 | 1296 |
| ECs0451 | branched-chain amino acid ABC transporter substrate-binding protein                                   | 481572 | 1320 |
| ECs0452 | permease                                                                                              | 482967 | 1374 |
| ECs0455 | ACP phosphodiesterase                                                                                 | 487967 | 582  |
| ECs0456 | S-adenosylmethionine--tRNA ribosyltransferase-isomerase                                               | 488641 | 1071 |
| ECs0457 | queuine tRNA-ribosyltransferase                                                                       | 489766 | 1128 |
| ECs0458 | preprotein translocase subunit YajC                                                                   | 490916 | 333  |
| ECs0460 | preprotein translocase subunit SecF                                                                   | 493134 | 972  |
| ECs0463 | hypothetical protein                                                                                  | 494860 | 348  |
| ECs0464 | nucleoside-specific channel-forming protein Tsx                                                       | 495384 | 885  |
| ECs0465 | hypothetical protein                                                                                  | 496567 | 540  |
| ECs0466 | transcriptional regulator NrdR                                                                        | 497257 | 450  |
| ECs0467 | bifunctional diaminohydroxyphosphoribosylaminopyrimidine deaminase/5-amino-6-(5-phosphoribosylamino)u | 497710 | 1104 |
| ECs0468 | 6,7-dimethyl-8-ribityllumazine synthase                                                               | 498902 | 471  |
| ECs0469 | transcription antitermination protein NusB                                                            | 499392 | 420  |
| ECs0470 | thiamine monophosphate kinase                                                                         | 499889 | 978  |
| ECs0471 | phosphatidylglycerophosphatase A                                                                      | 500844 | 516  |
| ECs0473 | NAD(P)H-dependent xylose reductase                                                                    | 503339 | 975  |
| ECs0474 | 1-deoxy-D-xylulose-5-phosphate synthase                                                               | 504368 | 1863 |
| ECs0475 | geranyltransferase                                                                                    | 506255 | 900  |
| ECs0476 | exodeoxyribonuclease VII small subunit                                                                | 507154 | 243  |
| ECs0477 | thiamine biosynthesis protein Thil                                                                    | 507602 | 1449 |
| ECs0478 | DJ-1 family protein                                                                                   | 509104 | 591  |
| ECs0479 | 2-dehydropantoate 2-reductase                                                                         | 509657 | 912  |
| ECs0480 | nucleotide-binding protein                                                                            | 510736 | 492  |
| ECs0481 | transporter                                                                                           | 511355 | 1365 |
| ECs0482 | protoheme IX farnesyltransferase                                                                      | 512868 | 891  |
| ECs0483 | cytochrome o ubiquinol oxidase subunit IV                                                             | 513770 | 330  |
| ECs0484 | cytochrome o ubiquinol oxidase subunit III                                                            | 514099 | 615  |
| ECs0485 | cytochrome o ubiquinol oxidase subunit I                                                              | 514703 | 1992 |
| ECs0486 | cytochrome o ubiquinol oxidase subunit II                                                             | 516716 | 948  |
| ECs0487 | muropeptide transporter                                                                               | 518123 | 1476 |
| ECs0488 | hypothetical protein                                                                                  | 519642 | 579  |
| ECs0489 | transcriptional regulator BolA                                                                        | 520525 | 318  |
| ECs0490 | trigger factor                                                                                        | 521186 | 1299 |
| ECs0491 | ATP-dependent Clp protease proteolytic subunit                                                        | 522729 | 624  |

|         |                                                                                                            |        |      |
|---------|------------------------------------------------------------------------------------------------------------|--------|------|
| ECs0492 | ATP-dependent protease ATP-binding protein ClpX                                                            | 523478 | 1275 |
| ECs0494 | transcriptional regulator HU subunit beta                                                                  | 527503 | 273  |
| ECs0495 | peptidyl-prolyl cis-trans isomerase                                                                        | 527967 | 1872 |
| ECs0496 | hypothetical protein                                                                                       | 529989 | 372  |
| ECs0497 | hypothetical protein                                                                                       | 530466 | 399  |
| ECs0498 | queuosine biosynthesis protein QueC                                                                        | 530916 | 696  |
| ECs0499 | hypothetical protein                                                                                       | 531676 | 1701 |
| ECs0500 | hypothetical protein                                                                                       | 533464 | 831  |
| ECs0501 | LRP-like transcriptional regulator                                                                         | 534446 | 459  |
| ECs0503 | multidrug transporter membrane\ATP-binding components                                                      | 536699 | 1782 |
| ECs0504 | nitrogen regulatory protein P-II 2                                                                         | 538661 | 339  |
| ECs0505 | ammonium transporter                                                                                       | 539029 | 1287 |
| ECs0506 | acyl-CoA thioesterase                                                                                      | 540364 | 861  |
| ECs0507 | glycoprotein/polysaccharide metabolism                                                                     | 541457 | 558  |
| ECs0508 | hypothetical protein                                                                                       | 542047 | 390  |
| ECs0509 | hypothetical protein                                                                                       | 542737 | 354  |
| ECs0511 | hypothetical protein                                                                                       | 544846 | 471  |
| ECs0513 | hemolysin expression-modulating protein                                                                    | 546155 | 219  |
| ECs0514 | hypothetical protein                                                                                       | 546399 | 375  |
| ECs0515 | acridine efflux pump                                                                                       | 547319 | 3150 |
| ECs0516 | acridine efflux pump                                                                                       | 550491 | 1194 |
| ECs0517 | AcrR family transcriptional regulator                                                                      | 551826 | 648  |
| ECs0520 | primosomal replication protein N"                                                                          | 556180 | 528  |
| ECs0521 | hypothetical protein                                                                                       | 556777 | 378  |
| ECs0522 | adenine phosphoribosyltransferase                                                                          | 557307 | 552  |
| ECs0524 | hypothetical protein                                                                                       | 559971 | 330  |
| ECs0525 | recombination protein RecR                                                                                 | 560300 | 606  |
| ECs0526 | heat shock protein 90                                                                                      | 561015 | 1875 |
| ECs0527 | adenylate kinase                                                                                           | 563070 | 645  |
| ECs0528 | ferrochelatase                                                                                             | 563846 | 963  |
| ECs0529 | acetyl esterase                                                                                            | 564805 | 960  |
| ECs0530 | inosine-guanosine kinase                                                                                   | 565916 | 1305 |
| ECs0531 | cation:proton antiport protein                                                                             | 567353 | 1677 |
| ECs0532 | fosmidomycin resistance protein                                                                            | 569266 | 1221 |
| ECs0533 | bifunctional UDP-sugar hydrolase/5'-nucleotidase periplasmic                                               | 570704 | 1653 |
| ECs0534 | hypothetical protein                                                                                       | 572393 | 480  |
| ECs0535 | ligase                                                                                                     | 573076 | 795  |
| ECs0538 | glutaminase                                                                                                | 577330 | 933  |
| ECs0539 | amino acid/amine transport protein                                                                         | 578265 | 1293 |
| ECs0545 | DNA-binding transcriptional regulator CueR                                                                 | 605156 | 408  |
| ECs0552 | protease                                                                                                   | 608653 | 918  |
| ECs0553 | ABC transporter ATP-binding protein                                                                        | 609716 | 678  |
| ECs0554 | metal resistance protein                                                                                   | 610380 | 780  |
| ECs0555 | thioredoxin-like protein                                                                                   | 611222 | 855  |
| ECs0556 | short chain dehydrogenase                                                                                  | 612137 | 810  |
| ECs0557 | ABC transporter ATP-binding protein                                                                        | 613530 | 687  |
| ECs0558 | multifunctional acyl-CoA thioesterase I/protease I/lysophospholipase L1                                    | 612936 | 627  |
| ECs0559 | oxidoreductase                                                                                             | 614213 | 2415 |
| ECs0564 | tRNA 2-selenouridine synthase                                                                              | 622725 | 1095 |
| ECs0565 | AIS family transcriptional regulator                                                                       | 623888 | 927  |
| ECs0566 | ureidoglycolate hydrolase                                                                                  | 625044 | 483  |
| ECs0567 | DNA-binding transcriptional repressor AlIR                                                                 | 625604 | 816  |
| ECs0568 | glyoxylate carboligase                                                                                     | 626509 | 1782 |
| ECs0569 | hydroxypyruvate isomerase                                                                                  | 628303 | 777  |
| ECs0570 | tartronic semialdehyde reductase                                                                           | 629180 | 879  |
| ECs0576 | glycerate kinase                                                                                           | 634396 | 1146 |
| ECs0577 | hypothetical protein                                                                                       | 635769 | 786  |
| ECs0579 | ureidoglycolate dehydrogenase                                                                              | 637822 | 1050 |
| ECs0580 | membrane protein FdrA                                                                                      | 639188 | 1668 |
| ECs0581 | hypothetical protein                                                                                       | 641123 | 1002 |
| ECs0582 | carboxylase                                                                                                | 642135 | 816  |
| ECs0583 | carbamate kinase                                                                                           | 642947 | 894  |
| ECs0584 | phosphoribosylaminoimidazole carboxylase ATPase subunit                                                    | 643979 | 1068 |
| ECs0585 | phosphoribosylaminoimidazole carboxylase catalytic subunit                                                 | 645043 | 510  |
| ECs0586 | UDP-2,3-diacetylglucosamine hydrolase                                                                      | 645670 | 723  |
| ECs0587 | peptidyl-prolyl cis-trans isomerase B                                                                      | 646395 | 495  |
| ECs0589 | hypothetical protein                                                                                       | 648484 | 522  |
| ECs0590 | hypothetical protein                                                                                       | 649113 | 213  |
| ECs0591 | bifunctional 5,10-methylene-tetrahydrofolate dehydrogenase/ 5,10-methylene-tetrahydrofolate cyclohydrolase | 649327 | 867  |
| ECs0599 | hypothetical protein                                                                                       | 658248 | 891  |
| ECs0600 | bacteriophage N4 receptor, outer membrane subunit                                                          | 659139 | 2973 |
| ECs0609 | CusR family transcriptional regulator                                                                      | 677420 | 684  |
| ECs0610 | copper/silver efflux system outer membrane protein CusC                                                    | 678260 | 1383 |
| ECs0611 | copper-binding protein                                                                                     | 679666 | 333  |
| ECs0612 | copper/silver efflux system membrane fusion protein CusB                                                   | 680014 | 1224 |
| ECs0613 | inner membrane component for iron transport                                                                | 681249 | 3138 |
| ECs0616 | dihydropteridine reductase                                                                                 | 687287 | 654  |

|         |                                                             |        |      |
|---------|-------------------------------------------------------------|--------|------|
| ECs0617 | hypothetical protein                                        | 688034 | 369  |
| ECs0618 | hypothetical protein                                        | 688467 | 249  |
| ECs0623 | outer membrane receptor FepA                                | 691910 | 2241 |
| ECs0625 | enterobactin synthase subunit F                             | 695813 | 3882 |
| ECs0627 | iron-enterobactin transporter ATP-binding protein           | 701040 | 816  |
| ECs0628 | iron-enterobactin transporter permease                      | 701852 | 993  |
| ECs0629 | iron-enterobactin transporter membrane protein              | 702841 | 1005 |
| ECs0630 | enterobactin exporter EntS                                  | 703956 | 1251 |
| ECs0631 | iron-enterobactin transporter periplasmic binding protein   | 705210 | 957  |
| ECs0632 | isochorismate synthase                                      | 706355 | 1176 |
| ECs0633 | enterobactin synthase subunit E                             | 707540 | 1611 |
| ECs0634 | 2,3-dihydro-2,3-dihydroxybenzoate synthetase                | 709164 | 858  |
| ECs0635 | 2,3-dihydroxybenzoate-2,3-dehydrogenase                     | 710021 | 747  |
| ECs0636 | hypothetical protein                                        | 710770 | 414  |
| ECs0637 | carbon starvation protein                                   | 711364 | 2106 |
| ECs0638 | hypothetical protein                                        | 713858 | 1089 |
| ECs0639 | aminotransferase                                            | 715055 | 1161 |
| ECs0641 | hypothetical protein                                        | 716818 | 1221 |
| ECs0643 | disulfide isomerase/thiol-disulfide oxidase                 | 719297 | 747  |
| ECs0644 | alkyl hydroperoxide reductase                               | 720415 | 564  |
| ECs0645 | alkyl hydroperoxide reductase                               | 721077 | 1596 |
| ECs0646 | hypothetical protein                                        | 722793 | 429  |
| ECs0649 | nucleoside diphosphate kinase regulator                     | 724911 | 411  |
| ECs0651 | hypothetical protein                                        | 726471 | 1464 |
| ECs0652 | triphosphoribosyl-dephospho-CoA synthase                    | 727985 | 879  |
| ECs0653 | 2-(5"-triphosphoribosyl)-3'-dephosphocoenzyme-A synthase    | 728838 | 552  |
| ECs0654 | citrate lyase subunit alpha                                 | 729393 | 1533 |
| ECs0655 | citrate lyase subunit beta                                  | 730936 | 909  |
| ECs0656 | citrate lyase subunit gamma                                 | 731841 | 297  |
| ECs0658 | sensor-type protein                                         | 733590 | 1659 |
| ECs0659 | two-component response regulator DpiA                       | 735217 | 681  |
| ECs0660 | C4-dicarboxylate transporter DcuC                           | 735938 | 1386 |
| ECs0662 | cold shock protein CspE                                     | 738647 | 210  |
| ECs0663 | camphor resistance protein CrcB                             | 738910 | 384  |
| ECs0665 | twin arginine translocase E                                 | 740303 | 204  |
| ECs0666 | lipoyl synthase                                             | 740607 | 966  |
| ECs0668 | lipoate-protein ligase B                                    | 742994 | 642  |
| ECs0669 | hypothetical protein                                        | 743736 | 264  |
| ECs0670 | D-alanyl-D-alanine carboxypeptidase                         | 744109 | 1212 |
| ECs0671 | rare lipoprotein A                                          | 745460 | 1089 |
| ECs0673 | penicillin-binding protein 2                                | 747674 | 1902 |
| ECs0674 | rRNA large subunit methyltransferase                        | 749606 | 468  |
| ECs0675 | hypothetical protein                                        | 750077 | 318  |
| ECs0676 | PhpB                                                        | 750654 | 612  |
| ECs0677 | nicotinic acid mononucleotide adenyltransferase             | 751289 | 642  |
| ECs0678 | DNA polymerase III subunit delta                            | 751932 | 1032 |
| ECs0679 | LPS-assembly lipoprotein RlpB                               | 752963 | 582  |
| ECs0680 | leucyl-tRNA synthetase                                      | 753559 | 2583 |
| ECs0681 | hypothetical protein                                        | 756377 | 483  |
| ECs0690 | ribonucleoside hydrolase 1                                  | 764837 | 936  |
| ECs0691 | glutamate/aspartate ABC transporter ATP-binding protein     | 765890 | 726  |
| ECs0692 | glutamate/aspartate transport system permease               | 766615 | 675  |
| ECs0693 | glutamate/aspartate transport system permease               | 767289 | 741  |
| ECs0694 | glutamate and aspartate transporter subunit                 | 768199 | 909  |
| ECs0696 | transporter                                                 | 771067 | 879  |
| ECs0697 | metalloprotease                                             | 772035 | 468  |
| ECs0698 | ATP-binding protein in pho regulon                          | 772499 | 1080 |
| ECs0699 | (dimethylallyl)adenosine tRNA methylthiotransferase         | 773692 | 1425 |
| ECs0700 | 2-octaprenyl-3-methyl-6-methoxy-1,4-benzoquinol hydroxylase | 775262 | 1176 |
| ECs0705 | UMP phosphatase                                             | 779597 | 753  |
| ECs0706 | transcriptional repressor of N-acetylglucosamine operon     | 780397 | 1221 |
| ECs0707 | N-acetylglucosamine-6-phosphate deacetylase                 | 781626 | 1149 |
| ECs0708 | glucosamine-6-phosphate deaminase                           | 782834 | 801  |
| ECs0710 | glutaminyl-tRNA synthetase                                  | 786116 | 1665 |
| ECs0713 | hypothetical protein                                        | 789814 | 327  |
| ECs0714 | ferric uptake regulator                                     | 790224 | 447  |
| ECs0715 | flavodoxin FldA                                             | 790959 | 531  |
| ECs0716 | LexA regulated protein                                      | 791629 | 363  |
| ECs0717 | hypothetical protein                                        | 792062 | 765  |
| ECs0718 | replication initiation regulator SeqA                       | 793011 | 546  |
| ECs0719 | phosphoglucomutase                                          | 793582 | 1641 |
| ECs0723 | sensor protein KdpD                                         | 800157 | 2685 |
| ECs0724 | potassium-transporting ATPase subunit C                     | 802834 | 573  |
| ECs0726 | potassium-transporting ATPase subunit A                     | 805486 | 1674 |
| ECs0727 | potassium-transporting ATPase subunit F                     | 807159 | 90   |
| ECs0728 | hypothetical protein                                        | 807561 | 207  |
| ECs0732 | hypothetical protein                                        | 815647 | 510  |

|         |                                                                |         |      |
|---------|----------------------------------------------------------------|---------|------|
| ECs0733 | deoxyribodipyrimidine photolyase                               | 816153  | 1419 |
| ECs0734 | transporter                                                    | 817721  | 1482 |
| ECs0735 | hydrolase-oxidase                                              | 819473  | 744  |
| ECs0736 | carboxylase                                                    | 820239  | 657  |
| ECs0737 | carboxylase                                                    | 820889  | 933  |
| ECs0738 | LamB/YcsF family protein                                       | 821811  | 735  |
| ECs0745 | type II citrate synthase                                       | 829830  | 1284 |
| ECs0746 | succinate dehydrogenase cytochrome b556 large membrane subunit | 831822  | 390  |
| ECs0747 | succinate dehydrogenase cytochrome b556 small membrane subunit | 832205  | 348  |
| ECs0748 | succinate dehydrogenase flavoprotein subunit                   | 832552  | 1767 |
| ECs0749 | succinate dehydrogenase iron-sulfur subunit                    | 834334  | 717  |
| ECs0751 | 2-oxoglutarate dehydrogenase E1                                | 835351  | 2802 |
| ECs0752 | dihydrolipoamide succinyltransferase                           | 838167  | 1218 |
| ECs0753 | succinyl-CoA synthetase subunit beta                           | 839478  | 1167 |
| ECs0754 | succinyl-CoA synthetase subunit alpha                          | 840644  | 870  |
| ECs0768 | cytochrome d terminal oxidase polypeptide subunit I            | 855961  | 1572 |
| ECs0769 | cytochrome d terminal oxidase polypeptide subunit II           | 857548  | 1140 |
| ECs0770 | hypothetical protein                                           | 858815  | 294  |
| ECs0771 | acyl-CoA thioester hydrolase                                   | 859258  | 405  |
| ECs0772 | colicin uptake protein TolQ                                    | 859659  | 693  |
| ECs0773 | colicin uptake protein TolR                                    | 860355  | 429  |
| ECs0775 | translocation protein TolB                                     | 862165  | 1293 |
| ECs0777 | tol-pal system protein YbgF                                    | 864023  | 792  |
| ECs0851 | kinase inhibitor protein                                       | 929799  | 477  |
| ECs0852 | adenosylmethionine-8-amino-7-oxononanoate aminotransferase     | 930334  | 1290 |
| ECs0853 | biotin synthase                                                | 931710  | 1041 |
| ECs0854 | 8-amino-7-oxononanoate synthase                                | 932747  | 1155 |
| ECs0855 | biotin biosynthesis protein BioC                               | 933888  | 756  |
| ECs0856 | dithiobiotin synthetase                                        | 934636  | 678  |
| ECs0857 | excinuclease ABC subunit B                                     | 935892  | 2022 |
| ECs0858 | structural protein                                             | 938104  | 909  |
| ECs0859 | molybdenum cofactor biosynthesis protein A                     | 939409  | 990  |
| ECs0860 | molybdenum cofactor biosynthesis protein B                     | 940420  | 513  |
| ECs0861 | molybdenum cofactor biosynthesis protein MoaC                  | 940935  | 486  |
| ECs0862 | molybdopterin synthase small subunit                           | 941413  | 246  |
| ECs0863 | molybdopterin guanine dinucleotide biosynthesis protein MoaE   | 941660  | 453  |
| ECs0864 | hypothetical protein                                           | 942248  | 705  |
| ECs0866 | hypothetical protein                                           | 943909  | 957  |
| ECs0867 | cardiolipin synthase 2                                         | 944865  | 1242 |
| ECs0869 | hypothetical protein                                           | 946997  | 411  |
| ECs0870 | hypothetical protein                                           | 947369  | 1107 |
| ECs0871 | hypothetical protein                                           | 948486  | 1134 |
| ECs0872 | ABC transporter ATP-binding protein                            | 949612  | 1737 |
| ECs0873 | hypothetical protein                                           | 951341  | 999  |
| ECs0874 | DNA-binding transcriptional regulator                          | 952339  | 684  |
| ECs0875 | ATP-dependent RNA helicase RhIE                                | 953239  | 1368 |
| ECs0878 | glycosyl transferase family protein                            | 959688  | 963  |
| ECs0879 | hypothetical protein                                           | 960791  | 1086 |
| ECs0880 | hypothetical protein                                           | 962105  | 261  |
| ECs0881 | hypothetical protein                                           | 962630  | 267  |
| ECs0882 | hydroxylase                                                    | 962972  | 687  |
| ECs0885 | SAM-dependent methyltransferase                                | 966702  | 1008 |
| ECs0887 | glutamine ABC transporter ATP-binding protein                  | 970048  | 723  |
| ECs0888 | glutamine ABC transporter permease                             | 970767  | 660  |
| ECs0889 | glutamine ABC transporter periplasmic protein                  | 971564  | 747  |
| ECs0890 | DNA starvation/stationary phase protection protein Dps         | 972714  | 504  |
| ECs0892 | outer membrane protein X                                       | 974756  | 516  |
| ECs0893 | hypothetical protein                                           | 975320  | 1584 |
| ECs0894 | manganese transport regulator MntR                             | 977489  | 468  |
| ECs0896 | hypothetical protein                                           | 979129  | 921  |
| ECs0897 | ABC transporter ATP-binding protein                            | 980268  | 1593 |
| ECs0899 | hypothetical protein                                           | 983445  | 816  |
| ECs0902 | pyruvate formate-lyase 2 activating enzyme                     | 986843  | 900  |
| ECs0903 | fructose-6-phosphate aldolase                                  | 987873  | 663  |
| ECs0904 | molybdopterin biosynthesis protein MoeB                        | 988714  | 750  |
| ECs0905 | molybdopterin biosynthesis protein MoeA                        | 989463  | 1236 |
| ECs0909 | transporter                                                    | 993745  | 1539 |
| ECs0910 | transport system permease                                      | 995301  | 921  |
| ECs0911 | transport system permease                                      | 996224  | 912  |
| ECs0912 | hypothetical protein                                           | 997313  | 2349 |
| ECs0915 | ribosomal protein S12 methylthiotransferase                    | 1001998 | 1326 |
| ECs0916 | biofilm formation regulatory protein BssR                      | 1003536 | 384  |
| ECs0917 | dehydrogenase                                                  | 1004030 | 1116 |
| ECs0919 | D-alanyl-D-alanine carboxypeptidase                            | 1006014 | 1203 |
| ECs0920 | DeoR family transcriptional regulator                          | 1007263 | 759  |
| ECs0921 | undecaprenyl pyrophosphate phosphatase                         | 1008079 | 597  |
| ECs0923 | hypothetical protein                                           | 1010233 | 285  |

|         |                                                                   |         |      |
|---------|-------------------------------------------------------------------|---------|------|
| ECs0924 | hypothetical protein                                              | 1010603 | 816  |
| ECs0925 | DeoR family transcriptional regulator                             | 1011418 | 1209 |
| ECs0926 | DeoR family transcriptional regulator                             | 1012710 | 537  |
| ECs0927 | hypothetical protein                                              | 1013421 | 1686 |
| ECs0928 | hypothetical protein                                              | 1015376 | 378  |
| ECs0929 | glutaredoxin                                                      | 1015783 | 258  |
| ECs0930 | hypothetical protein                                              | 1016200 | 288  |
| ECs0931 | nitroreductase A                                                  | 1016471 | 723  |
| ECs0932 | ribosomal protein S6 modification protein                         | 1017254 | 903  |
| ECs0933 | sensory transduction regulator                                    | 1018244 | 477  |
| ECs0934 | putrescine ABC transporter periplasmic-binding protein            | 1019071 | 1113 |
| ECs0935 | putrescine transporter ATP-binding protein                        | 1020278 | 1134 |
| ECs0937 | putrescine ABC transporter membrane protein                       | 1022371 | 846  |
| ECs0938 | hypothetical protein                                              | 1023276 | 489  |
| ECs0944 | arginine transporter permease ArtM                                | 1029463 | 669  |
| ECs0945 | arginine transporter permease ArtQ                                | 1030131 | 717  |
| ECs0946 | arginine ABC transporter substrate-binding protein                | 1030854 | 732  |
| ECs0947 | arginine transporter ATP-binding protein                          | 1031603 | 729  |
| ECs0952 | hypothetical protein                                              | 1035705 | 324  |
| ECs0953 | regulator                                                         | 1036025 | 831  |
| ECs0954 | nucleotide di-P-sugar epimerase or dehydratase                    | 1036852 | 1050 |
| ECs0955 | dTDP-glucose enzyme                                               | 1037964 | 1431 |
| ECs0956 | L-threonine aldolase                                              | 1039405 | 1002 |
| ECs0957 | pyruvate dehydrogenase                                            | 1040443 | 1719 |
| ECs0959 | hydroxylamine reductase                                           | 1043274 | 1653 |
| ECs0960 | surface protein                                                   | 1045070 | 900  |
| ECs0961 | aquaporin Z                                                       | 1046427 | 696  |
| ECs0962 | hypothetical protein                                              | 1047548 | 1659 |
| ECs0963 | hypothetical protein                                              | 1049203 | 993  |
| ECs0966 | stationary phase/starvation inducible regulatory protein CspD     | 1053441 | 225  |
| ECs0967 | ATP-dependent Clp protease adaptor protein ClpS                   | 1053988 | 321  |
| ECs0968 | ATP-dependent Clp protease ATP-binding protein                    | 1054339 | 2277 |
| ECs0969 | translation initiation factor IF-1                                | 1057302 | 219  |
| ECs0970 | leucyl/phenylalanyl-tRNA--protein transferase                     | 1057805 | 705  |
| ECs0971 | cysteine/glutathione ABC transporter membrane/ATP-binding protein | 1058551 | 1722 |
| ECs0972 | cysteine/glutathione ABC transporter membrane/ATP-binding protein | 1060273 | 1767 |
| ECs0973 | thioredoxin reductase                                             | 1062162 | 966  |
| ECs0974 | leucine-responsive transcriptional regulator                      | 1063672 | 495  |
| ECs0976 | outer-membrane lipoprotein carrier protein                        | 1068481 | 615  |
| ECs0977 | recombination factor protein RarA                                 | 1069106 | 1344 |
| ECs0978 | seryl-tRNA synthetase                                             | 1070540 | 1293 |
| ECs0980 | anaerobic dimethyl sulfoxide reductase subunit B                  | 1074526 | 618  |
| ECs0981 | anaerobic dimethyl sulfoxide reductase subunit C                  | 1075145 | 864  |
| ECs0983 | MFS family transporter protein                                    | 1076985 | 1149 |
| ECs0985 | pyruvate formate lyase-activating enzyme 1                        | 1079983 | 741  |
| ECs0986 | formate acetyltransferase 1                                       | 1080915 | 2283 |
| ECs0987 | formate transporter                                               | 1083252 | 858  |
| ECs0988 | hypothetical protein                                              | 1084515 | 1761 |
| ECs0989 | hypothetical protein                                              | 1086405 | 693  |
| ECs0990 | phosphoserine aminotransferase                                    | 1087296 | 1089 |
| ECs0991 | 3-phosphoshikimate 1-carboxyvinyltransferase                      | 1088455 | 1284 |
| ECs0992 | heat shock protein                                                | 1089883 | 789  |
| ECs0993 | cytidylate kinase                                                 | 1090844 | 684  |
| ECs0994 | 30S ribosomal protein S1                                          | 1091638 | 1674 |
| ECs0995 | integration host factor subunit beta                              | 1093471 | 285  |
| ECs0996 | hypothetical protein                                              | 1093962 | 2265 |
| ECs0997 | lipid transporter ATP-binding protein/permease                    | 1096263 | 1749 |
| ECs0998 | tetraacyldisaccharide 4'-kinase                                   | 1098008 | 987  |
| ECs0999 | hypothetical protein                                              | 1099031 | 1233 |
| ECs1000 | hypothetical protein                                              | 1100315 | 183  |
| ECs1001 | 3-deoxy-manno-octulosonate cytidyltransferase                     | 1100494 | 747  |
| ECs1002 | hypothetical protein                                              | 1101394 | 894  |
| ECs1003 | hypothetical protein                                              | 1102264 | 780  |
| ECs1006 | condesin subunit E                                                | 1105264 | 705  |
| ECs1008 | hypothetical protein                                              | 1110689 | 1848 |
| ECs1009 | hypothetical protein                                              | 1112717 | 549  |
| ECs1010 | hypothetical protein                                              | 1113292 | 648  |
| ECs1011 | aromatic amino acid aminotransferase                              | 1113990 | 1191 |
| ECs1013 | asparaginyl-tRNA synthetase                                       | 1117056 | 1401 |
| ECs1014 | nicotinate phosphoribosyltransferase                              | 1118625 | 1203 |
| ECs1015 | aminopeptidase                                                    | 1120093 | 2613 |
| ECs1017 | alkanesulfonate transporter permease                              | 1123512 | 792  |
| ECs1018 | alkanesulfonate monooxygenase                                     | 1124315 | 1146 |
| ECs1020 | NAD(P)H-dependent FMN reductase                                   | 1126409 | 576  |
| ECs1030 | hypothetical protein                                              | 1135423 | 543  |
| ECs1031 | hypothetical protein                                              | 1135962 | 1110 |
| ECs1032 | 23S rRNA m(2)G2445 methyltransferase                              | 1137315 | 2109 |

|         |                                                            |         |      |
|---------|------------------------------------------------------------|---------|------|
| ECs1034 | paraquat-inducible protein A                               | 1141472 | 1254 |
| ECs1035 | paraquat-inducible protein B                               | 1142730 | 1641 |
| ECs1036 | hypothetical protein                                       | 1144382 | 549  |
| ECs1037 | ribosome modulation factor                                 | 1145186 | 168  |
| ECs1038 | 3-hydroxydecanoyl-ACP dehydratase                          | 1145423 | 519  |
| ECs1040 | hypothetical protein                                       | 1147956 | 453  |
| ECs1041 | outer membrane protein A                                   | 1148484 | 1041 |
| ECs1042 | SOS cell division inhibitor                                | 1149881 | 510  |
| ECs1043 | hypothetical protein                                       | 1150609 | 630  |
| ECs1044 | hypothetical protein                                       | 1151201 | 2163 |
| ECs1045 | hypothetical protein                                       | 1153373 | 447  |
| ECs1047 | methylglyoxal synthase                                     | 1156028 | 459  |
| ECs1048 | hypothetical protein                                       | 1156582 | 663  |
| ECs1049 | hypothetical protein                                       | 1157417 | 414  |
| ECs1050 | heat shock protein HspQ                                    | 1157875 | 318  |
| ECs1053 | sulfur transfer protein TusE                               | 1159810 | 330  |
| ECs1054 | hypothetical protein                                       | 1160230 | 660  |
| ECs1128 | hydrogenase-1 small subunit                                | 1211259 | 1119 |
| ECs1129 | hydrogenase 1 large subunit                                | 1212374 | 1794 |
| ECs1130 | hydrogenase 1 b-type cytochrome subunit                    | 1214186 | 708  |
| ECs1131 | hydrogenase 1 maturation protease                          | 1214890 | 588  |
| ECs1132 | hydrogenase-1 operon protein HyaE                          | 1215474 | 399  |
| ECs1133 | hydrogenase-1 operon protein HyaF                          | 1215869 | 858  |
| ECs1135 | third cytochrome oxidase subunit II                        | 1218416 | 1137 |
| ECs1136 | phosphoanhydride phosphorylase                             | 1219737 | 1305 |
| ECs1144 | cold shock-like protein                                    | 1229317 | 213  |
| ECs1145 | cold shock protein CspG                                    | 1229815 | 213  |
| ECs1149 | TMAO reductase system periplasmic protein TorT             | 1234614 | 1029 |
| ECs1150 | DNA-binding transcriptional regulator TorR                 | 1235615 | 693  |
| ECs1151 | trimethylamine N-oxide reductase cytochrome c-type subunit | 1236437 | 1173 |
| ECs1152 | trimethylamine N-oxide reductase subunit                   | 1237609 | 2547 |
| ECs1153 | chaperone protein TorD                                     | 1240152 | 600  |
| ECs1154 | chaperone-modulator protein CbpM                           | 1240905 | 306  |
| ECs1155 | curved DNA-binding protein CbpA                            | 1241210 | 921  |
| ECs1158 | glucose-1-phosphatase/inositol phosphatase                 | 1243938 | 1242 |
| ECs1159 | hypothetical protein                                       | 1245217 | 228  |
| ECs1252 | transporter                                                | 1309331 | 1329 |
| ECs1253 | hypothetical protein                                       | 1310680 | 495  |
| ECs1254 | hypothetical protein                                       | 1311185 | 591  |
| ECs1257 | synthetase                                                 | 1312991 | 696  |
| ECs1258 | hypothetical protein                                       | 1313683 | 1095 |
| ECs1261 | major sodium/proline symporter                             | 1320125 | 1509 |
| ECs1264 | hypothetical protein                                       | 1325195 | 1128 |
| ECs1265 | hypothetical protein                                       | 1326328 | 1272 |
| ECs1412 | oxidoreductase component                                   | 1458780 | 555  |
| ECs1414 | protein CsgG                                               | 1459991 | 834  |
| ECs1415 | curli assembly protein CsgF                                | 1460851 | 417  |
| ECs1416 | curli assembly protein CsgE                                | 1461292 | 390  |
| ECs1417 | DNA-binding transcriptional regulator CsgD                 | 1461686 | 651  |
| ECs1419 | curlin minor subunit                                       | 1463090 | 456  |
| ECs1420 | cryptic curlin major subunit                               | 1463586 | 459  |
| ECs1421 | autoagglutination protein                                  | 1464103 | 333  |
| ECs1423 | hypothetical protein                                       | 1464962 | 534  |
| ECs1426 | glucan biosynthesis protein G                              | 1468476 | 1536 |
| ECs1427 | glucosyltransferase MdoH                                   | 1469974 | 2574 |
| ECs1429 | hypothetical protein                                       | 1472948 | 375  |
| ECs1431 | hypothetical protein                                       | 1473405 | 972  |
| ECs1432 | lipid A biosynthesis lauroyl acyltransferase               | 1474803 | 921  |
| ECs1433 | hypothetical protein                                       | 1475948 | 1053 |
| ECs1434 | hypothetical protein                                       | 1477042 | 576  |
| ECs1435 | cytochrome                                                 | 1477621 | 567  |
| ECs1437 | N-methyltryptophan oxidase                                 | 1478609 | 1119 |
| ECs1439 | DNA damage-inducible protein I                             | 1480386 | 246  |
| ECs1440 | dihydroorotase                                             | 1480705 | 1047 |
| ECs1441 | hypothetical protein                                       | 1481857 | 561  |
| ECs1442 | glutaredoxin                                               | 1482551 | 648  |
| ECs1443 | multidrug resistance protein MdtH                          | 1483262 | 1209 |
| ECs1444 | ribosomal-protein-S5-alanine N-acetyltransferase           | 1484706 | 585  |
| ECs1445 | hypothetical protein                                       | 1485301 | 648  |
| ECs1446 | hypothetical protein                                       | 1485950 | 924  |
| ECs1447 | hypothetical protein                                       | 1486983 | 1536 |
| ECs1449 | anti-sigma-28 factor FlgM                                  | 1488979 | 294  |
| ECs1450 | flagellar basal body P-ring biosynthesis protein FlgA      | 1489348 | 660  |
| ECs1451 | flagellar basal-body rod protein FlgB                      | 1490162 | 417  |
| ECs1452 | flagellar basal body rod protein FlgC                      | 1490582 | 405  |
| ECs1453 | flagellar basal body rod modification protein              | 1490998 | 696  |
| ECs1454 | flagellar hook protein FlgE                                | 1491718 | 1206 |



|         |                                                                                        |         |      |
|---------|----------------------------------------------------------------------------------------|---------|------|
| ECs1456 | flagellar basal body rod protein FlgG                                                  | 1493836 | 783  |
| ECs1457 | flagellar basal body L-ring protein                                                    | 1494671 | 699  |
| ECs1458 | flagellar basal body P-ring protein                                                    | 1495378 | 1101 |
| ECs1459 | flagellar rod assembly protein/muramidase FlgJ                                         | 1496478 | 942  |
| ECs1460 | flagellar hook-associated protein FlgK                                                 | 1497485 | 1644 |
| ECs1461 | flagellar hook-associated protein FlgL                                                 | 1499140 | 954  |
| ECs1462 | ribonuclease E                                                                         | 1500288 | 3186 |
| ECs1463 | hypothetical protein                                                                   | 1503554 | 375  |
| ECs1465 | Maf-like protein                                                                       | 1505106 | 585  |
| ECs1467 | 50S ribosomal protein L32                                                              | 1506462 | 174  |
| ECs1468 | glycerol-3-phosphate acyltransferase PlsX                                              | 1506716 | 1071 |
| ECs1470 | ACP S-malonyltransferase                                                               | 1508823 | 930  |
| ECs1471 | 3-ketoacyl-ACP reductase                                                               | 1509765 | 735  |
| ECs1472 | acyl carrier protein                                                                   | 1510710 | 237  |
| ECs1473 | 3-oxoacyl-ACP synthase                                                                 | 1511034 | 1242 |
| ECs1476 | thymidylate kinase                                                                     | 1514219 | 642  |
| ECs1477 | DNA polymerase III subunit delta'                                                      | 1514857 | 1005 |
| ECs1478 | metallobased hydrolase                                                                 | 1515872 | 798  |
| ECs1479 | PTS system glucose-specific transporter subunit IIBC                                   | 1516964 | 1434 |
| ECs1480 | ferric-rhodotorulic acid outer membrane transporter                                    | 1518457 | 2190 |
| ECs1481 | purine nucleoside phosphoramidase                                                      | 1520974 | 378  |
| ECs1482 | hypothetical protein                                                                   | 1521354 | 378  |
| ECs1483 | hypothetical protein                                                                   | 1521745 | 642  |
| ECs1484 | thiamine kinase                                                                        | 1522367 | 825  |
| ECs1485 | beta-hexosaminidase                                                                    | 1523202 | 1026 |
| ECs1486 | hypothetical protein                                                                   | 1524250 | 543  |
| ECs1488 | hypothetical protein                                                                   | 1526723 | 540  |
| ECs1489 | hypothetical protein                                                                   | 1527324 | 633  |
| ECs1491 | hypothetical protein                                                                   | 1528537 | 963  |
| ECs1492 | transcription-repair coupling factor                                                   | 1529643 | 3447 |
| ECs1494 | outer membrane-specific lipoprotein transporter subunit LolC                           | 1534552 | 1200 |
| ECs1495 | lipoprotein transporter ATP-binding protein                                            | 1535744 | 702  |
| ECs1496 | outer membrane-specific lipoprotein transporter subunit LolE                           | 1536445 | 1245 |
| ECs1497 | N-acetyl-D-glucosamine kinase                                                          | 1537718 | 912  |
| ECs1498 | NAD-dependent deacetylase                                                              | 1538645 | 822  |
| ECs1499 | spermidine/putrescine ABC transporter substrate-binding protein                        | 1539622 | 1047 |
| ECs1500 | spermidine/putrescine ABC transporter membrane protein                                 | 1540665 | 795  |
| ECs1668 | cell division topological specificity factor MinE                                      | 1665766 | 267  |
| ECs1669 | cell division inhibitor MinD                                                           | 1666036 | 813  |
| ECs1670 | septum formation inhibitor                                                             | 1666872 | 696  |
| ECs1671 | hypothetical protein                                                                   | 1668087 | 369  |
| ECs1674 | hypothetical protein                                                                   | 1669200 | 294  |
| ECs1675 | hypothetical protein                                                                   | 1669565 | 660  |
| ECs1676 | hypothetical protein                                                                   | 1670316 | 447  |
| ECs1678 | DNA polymerase V subunit UmuD                                                          | 1672253 | 420  |
| ECs1680 | disulfide bond formation protein B                                                     | 1673986 | 531  |
| ECs1686 | potassium/proton antiporter                                                            | 1681862 | 1737 |
| ECs1687 | murein transglycosylase E                                                              | 1684594 | 726  |
| ECs1688 | L,D-carboxypeptidase A                                                                 | 1683694 | 915  |
| ECs1832 | tryptophan synthase subunit alpha                                                      | 1817436 | 807  |
| ECs1834 | bifunctional indole-3-glycerol phosphate synthase/phosphoribosylanthranilate isomerase | 1819447 | 1362 |
| ECs1835 | bifunctional glutamine amidotransferase/anthranilate phosphoribosyltransferase         | 1820809 | 1596 |
| ECs1836 | anthranilate synthase component I                                                      | 1822404 | 1563 |
| ECs1841 | 23S rRNA pseudouridylylase synthase B                                                  | 1827562 | 873  |
| ECs1842 | cob(II)yrinic acid a,c-diamide adenosyltransferase                                     | 1828474 | 591  |
| ECs1843 | short chain dehydrogenase                                                              | 1829061 | 759  |
| ECs1844 | periplasmic protease                                                                   | 1830039 | 1050 |
| ECs1845 | hypothetical protein                                                                   | 1831124 | 252  |
| ECs1849 | aconitate hydratase                                                                    | 1836538 | 2676 |
| ECs1850 | GTP cyclohydrolase II                                                                  | 1839277 | 591  |
| ECs1851 | phosphatidylglycerophosphatase B                                                       | 1840037 | 765  |
| ECs1852 | hypothetical protein                                                                   | 1840950 | 309  |
| ECs1854 | orotidine 5'-phosphate decarboxylase                                                   | 1842627 | 738  |
| ECs1855 | translation initiation factor Sui1                                                     | 1843361 | 330  |
| ECs1856 | lipoprotein                                                                            | 1843816 | 219  |
| ECs1859 | exoribonuclease II                                                                     | 1847683 | 1935 |
| ECs1861 | enoyl-ACP reductase                                                                    | 1850956 | 789  |
| ECs1867 | peptide ABC transporter ATP-binding protein                                            | 1859761 | 807  |
| ECs1868 | peptide ABC transporter ATP-binding protein                                            | 1860569 | 993  |
| ECs1869 | peptide transport permease                                                             | 1861561 | 891  |
| ECs1870 | peptide transport permease                                                             | 1862438 | 966  |
| ECs1871 | peptide transport-like protein                                                         | 1863400 | 1644 |
| ECs1880 | phage shock protein operon transcriptional activator                                   | 1874754 | 978  |
| ECs1882 | phage shock protein B                                                                  | 1876620 | 225  |
| ECs1883 | PspC family transcriptional regulator                                                  | 1876844 | 360  |
| ECs1884 | peripheral inner membrane phage-shock protein                                          | 1877212 | 222  |
| ECs1885 | thiosulfate:cyanide sulfurtransferase                                                  | 1877508 | 315  |

|         |                                                                    |         |      |
|---------|--------------------------------------------------------------------|---------|------|
| ECs1900 | hypothetical protein                                               | 1891931 | 1398 |
| ECs1903 | thiol peroxidase                                                   | 1896119 | 507  |
| ECs1904 | muconate cycloisomerase I                                          | 1896744 | 966  |
| ECs1905 | murein peptide amidase A                                           | 1897684 | 789  |
| ECs1911 | transport periplasmic protein                                      | 1902585 | 1614 |
| ECs1912 | hypothetical protein                                               | 1904249 | 1032 |
| ECs1914 | universal stress protein UspE                                      | 1905831 | 951  |
| ECs1915 | fumarate/nitrate reduction transcriptional regulator               | 1906933 | 753  |
| ECs1924 | hypothetical protein                                               | 1915451 | 564  |
| ECs1926 | zinc transporter                                                   | 1917522 | 984  |
| ECs1927 | ATP-dependent RNA helicase DbpA                                    | 1918983 | 1374 |
| ECs1997 | filament protein                                                   | 1972708 | 435  |
| ECs2000 | oxidoreductase                                                     | 1974762 | 3525 |
| ECs2001 | heat-inducible protein                                             | 1978823 | 423  |
| ECs2002 | D-lactate dehydrogenase                                            | 1979356 | 990  |
| ECs2008 | oxidoreductase                                                     | 1990053 | 861  |
| ECs2014 | azoreductase                                                       | 1998085 | 606  |
| ECs2023 | cytochrome b561                                                    | 2008411 | 531  |
| ECs2028 | hypothetical protein                                               | 2012797 | 1344 |
| ECs2029 | glucan biosynthesis protein D                                      | 2014365 | 1656 |
| ECs2030 | hypothetical protein                                               | 2015941 | 204  |
| ECs2031 | hypothetical protein                                               | 2016160 | 225  |
| ECs2032 | ribosomal-protein-serine N-acetyltransferase                       | 2016447 | 297  |
| ECs2034 | potassium-tellurite ethidium and proflavin transporter             | 2018082 | 993  |
| ECs2035 | tellurite resistance protein TehB                                  | 2019071 | 594  |
| ECs2036 | hypothetical protein                                               | 2019968 | 669  |
| ECs2037 | hypothetical protein                                               | 2021935 | 537  |
| ECs2039 | collagenase                                                        | 2022502 | 2004 |
| ECs2040 | hypothetical protein                                               | 2024597 | 231  |
| ECs2044 | transporter                                                        | 2027417 | 1146 |
| ECs2045 | ABC transporter ATP-binding protein                                | 2028580 | 1014 |
| ECs2048 | gamma-aminobutyraldehyde dehydrogenase                             | 2031341 | 1425 |
| ECs2049 | hypothetical protein                                               | 2033104 | 222  |
| ECs2050 | hypothetical protein                                               | 2033411 | 234  |
| ECs2051 | hypothetical protein                                               | 2033645 | 450  |
| ECs2052 | resistance protein                                                 | 2034091 | 519  |
| ECs2055 | outer membrane receptor for iron transport                         | 2036726 | 2103 |
| ECs2056 | receptor                                                           | 2039070 | 1062 |
| ECs2067 | hypothetical protein                                               | 2054201 | 894  |
| ECs2069 | cryptic nitrate reductase 2 subunit delta                          | 2055850 | 696  |
| ECs2072 | nitrite extrusion protein 2                                        | 2061908 | 1389 |
| ECs2077 | hypothetical protein                                               | 2067710 | 882  |
| ECs2079 | nitrate-inducible formate dehydrogenase-N iron-sulfur beta subunit | 2071883 | 885  |
| ECs2080 | formate dehydrogenase-N subunit gamma                              | 2072760 | 654  |
| ECs2081 | hypothetical protein                                               | 2073641 | 285  |
| ECs2082 | alcohol dehydrogenase                                              | 2074071 | 1011 |
| ECs2084 | 30S ribosomal subunit S22                                          | 2077069 | 138  |
| ECs2085 | biofilm-dependent modulation protein                               | 2077308 | 216  |
| ECs2086 | osmotically inducible protein                                      | 2077868 | 432  |
| ECs2096 | hypothetical protein                                               | 2088749 | 1320 |
| ECs2097 | acid sensitivity protein                                           | 2090199 | 1536 |
| ECs2104 | transcriptional regulator YdeO                                     | 2104172 | 762  |
| ECs2105 | hypothetical protein                                               | 2105007 | 198  |
| ECs2129 | hypothetical protein                                               | 2134820 | 948  |
| ECs2130 | hypothetical protein                                               | 2136377 | 360  |
| ECs2131 | glutaminase                                                        | 2136736 | 927  |
| ECs2132 | succinate semialdehyde dehydrogenase                               | 2137726 | 1413 |
| ECs2133 | LysR family transcriptional regulator                              | 2139215 | 882  |
| ECs2135 | sugar efflux transporter                                           | 2141440 | 1191 |
| ECs2136 | multiple drug resistance protein MarC                              | 2142655 | 666  |
| ECs2137 | MarR family transcriptional regulator                              | 2143532 | 435  |
| ECs2139 | hypothetical protein                                               | 2144401 | 219  |
| ECs2141 | MFS-type transporter YdeE                                          | 2145744 | 1188 |
| ECs2148 | 3-hydroxy acid dehydrogenase                                       | 2153413 | 747  |
| ECs2150 | hypothetical protein                                               | 2155111 | 204  |
| ECs2151 | oxidoreductase                                                     | 2155350 | 1461 |
| ECs2288 | hypothetical protein                                               | 2255150 | 327  |
| ECs2289 | hypothetical protein                                               | 2255611 | 342  |
| ECs2290 | spermidine N1-acetyltransferase                                    | 2255987 | 561  |
| ECs2291 | hypothetical protein                                               | 2256550 | 711  |
| ECs2292 | hypothetical protein                                               | 2257365 | 309  |
| ECs2296 | DMSO reductase anchor subunit                                      | 2263412 | 855  |
| ECs2297 | twin-arginine leader-binding protein DmsD                          | 2264309 | 615  |
| ECs2300 | NAGC-like transcriptional regulator                                | 2267146 | 1221 |
| ECs2301 | LysR family transcriptional regulator                              | 2268501 | 894  |
| ECs2302 | transporter                                                        | 2269501 | 1254 |
| ECs2305 | multidrug efflux system protein MdtI                               | 2272621 | 330  |

|         |                                                                                |         |      |
|---------|--------------------------------------------------------------------------------|---------|------|
| ECs2306 | multidrug efflux system protein MdtJ                                           | 2272937 | 366  |
| ECs2308 | pyridine nucleotide transhydrogenase                                           | 2274773 | 1389 |
| ECs2309 | NAD(P) transhydrogenase subunit alpha                                          | 2276172 | 1533 |
| ECs2310 | hypothetical protein                                                           | 2278228 | 945  |
| ECs2311 | arginine/ornithine antiporter                                                  | 2279358 | 1383 |
| ECs2312 | short chain dehydrogenase                                                      | 2280777 | 723  |
| ECs2313 | hypothetical protein                                                           | 2281496 | 336  |
| ECs2315 | sensor protein RstB                                                            | 2282683 | 1302 |
| ECs2317 | fumarate hydratase                                                             | 2284986 | 1404 |
| ECs2318 | fumarase A                                                                     | 2286532 | 1647 |
| ECs2319 | mannose-6-phosphate isomerase                                                  | 2288377 | 1176 |
| ECs2320 | hypothetical protein                                                           | 2289653 | 1509 |
| ECs2323 | glucuronide transporter                                                        | 2292509 | 1374 |
| ECs2326 | repressor for uid operon                                                       | 2296083 | 591  |
| ECs2329 | bifunctional PTS system maltose and glucose-specific transporter subunits IICB | 2298984 | 1593 |
| ECs2330 | aminotrasferase                                                                | 2300586 | 1173 |
| ECs2331 | adenosine deaminase                                                            | 2301862 | 1002 |
| ECs2333 | beta-lactam resistance protein                                                 | 2304182 | 126  |
| ECs2334 | oriC-binding nucleoid-associated protein                                       | 2304580 | 216  |
| ECs2335 | hypothetical protein                                                           | 2304857 | 465  |
| ECs2336 | Na(+)-translocating NADH-quinone reductase subunit E                           | 2305398 | 582  |
| ECs2339 | electron transport complex protein RnfD                                        | 2308869 | 1059 |
| ECs2340 | electron transport complex protein RnfG                                        | 2309931 | 621  |
| ECs2341 | electron transport complex protein RxsE                                        | 2310555 | 696  |
| ECs2342 | endonuclease III                                                               | 2311250 | 636  |
| ECs2343 | tripeptide transporter permease                                                | 2312496 | 1503 |
| ECs2344 | glutathionine S-transferase                                                    | 2314104 | 606  |
| ECs2345 | pyridoxamine kinase                                                            | 2314753 | 864  |
| ECs2346 | tyrosyl-tRNA synthetase                                                        | 2315675 | 1275 |
| ECs2347 | pyridoxamine 5'-phosphate oxidase                                              | 2317078 | 657  |
| ECs2349 | anhydro-N-acetylmuramic acid kinase                                            | 2318220 | 1110 |
| ECs2350 | outer membrane protein                                                         | 2319602 | 468  |
| ECs2351 | transcriptional regulator SlyA                                                 | 2320116 | 435  |
| ECs2352 | hypothetical protein                                                           | 2320751 | 237  |
| ECs2353 | hypothetical protein                                                           | 2320990 | 858  |
| ECs2356 | hypothetical protein                                                           | 2324570 | 789  |
| ECs2357 | hypothetical protein                                                           | 2325749 | 600  |
| ECs2358 | hypothetical protein                                                           | 2325407 | 378  |
| ECs2360 | glyoxalase I                                                                   | 2327563 | 408  |
| ECs2361 | ribonuclease T                                                                 | 2328073 | 648  |
| ECs2363 | hypothetical protein                                                           | 2333480 | 348  |
| ECs2365 | superoxide dismutase                                                           | 2335105 | 582  |
| ECs2367 | DNA-binding transcriptional repressor PurR                                     | 2337555 | 1026 |
| ECs2368 | DNA-binding transcriptional regulator                                          | 2338577 | 933  |
| ECs2369 | inner membrane transport protein YdhC                                          | 2339622 | 1212 |
| ECs2370 | cyclopropane-fatty-acyl-phospholipid synthase                                  | 2341124 | 1149 |
| ECs2371 | riboflavin synthase subunit alpha                                              | 2342312 | 642  |
| ECs2372 | multidrug efflux protein                                                       | 2343168 | 1374 |
| ECs2373 | hypothetical protein                                                           | 2344582 | 1257 |
| ECs2375 | hypothetical protein                                                           | 2346842 | 1605 |
| ECs2377 | hypothetical protein                                                           | 2349274 | 786  |
| ECs2378 | oxidoreductase Fe-S subunit                                                    | 2350056 | 720  |
| ECs2379 | hypothetical protein                                                           | 2350788 | 648  |
| ECs2381 | hypothetical protein                                                           | 2353562 | 627  |
| ECs2382 | hypothetical protein                                                           | 2354644 | 210  |
| ECs2384 | murein lipoprotein                                                             | 2357133 | 237  |
| ECs2385 | hypothetical protein                                                           | 2357432 | 1005 |
| ECs2386 | cysteine desulfuration protein SufE                                            | 2358585 | 417  |
| ECs2387 | bifunctional cysteine desulfurase/selenocysteine lyase                         | 2359014 | 1221 |
| ECs2388 | cysteine desulfurase activator complex subunit SufD                            | 2360231 | 1272 |
| ECs2389 | cysteine desulfurase                                                           | 2361477 | 747  |
| ECs2390 | cysteine desulfurase activator complex subunit SufB                            | 2362233 | 1488 |
| ECs2391 | iron-sulfur cluster assembly scaffold protein                                  | 2363729 | 369  |
| ECs2392 | hypothetical protein                                                           | 2364646 | 270  |
| ECs2393 | hypothetical protein                                                           | 2364934 | 411  |
| ECs2394 | oxidase                                                                        | 2365341 | 3057 |
| ECs2398 | amino acid/amine transport protein                                             | 2372218 | 1272 |
| ECs2399 | quininate/shikimate dehydrogenase                                              | 2373501 | 867  |
| ECs2400 | 3-dehydroquininate dehydratase                                                 | 2374398 | 759  |
| ECs2402 | acyl-CoA dehydrogenase                                                         | 2376910 | 1152 |
| ECs2403 | AraC family transcriptional regulator                                          | 2378104 | 912  |
| ECs2404 | electron transfer flavoprotein YdiQ                                            | 2379331 | 765  |
| ECs2405 | electron transfer flavoprotein subunit YdiR                                    | 2380115 | 939  |
| ECs2406 | hypothetical protein                                                           | 2381109 | 1290 |
| ECs2407 | hypothetical protein                                                           | 2382395 | 294  |
| ECs2409 | phosphoenolpyruvate synthase                                                   | 2384448 | 2379 |
| ECs2410 | hypothetical protein                                                           | 2387159 | 834  |

|         |                                                                          |         |      |
|---------|--------------------------------------------------------------------------|---------|------|
| ECs2411 | phospho-2-dehydro-3-deoxyheptonate aldolase                              | 2388149 | 1047 |
| ECs2412 | hypothetical protein                                                     | 2389327 | 192  |
| ECs2413 | hypothetical protein                                                     | 2389522 | 1437 |
| ECs2414 | hypothetical protein                                                     | 2391021 | 714  |
| ECs2415 | lipoprotein                                                              | 2391981 | 465  |
| ECs2416 | vitamin B12-transporter ATPase                                           | 2392523 | 750  |
| ECs2418 | vitamin B12-transporter permease                                         | 2393886 | 981  |
| ECs2419 | integration host factor subunit alpha                                    | 2394967 | 300  |
| ECs2420 | phenylalanyl-tRNA synthetase subunit beta                                | 2395271 | 2388 |
| ECs2421 | phenylalanyl-tRNA synthetase subunit alpha                               | 2397673 | 984  |
| ECs2423 | 50S ribosomal protein L20                                                | 2399106 | 357  |
| ECs2425 | translation initiation factor IF-3                                       | 2399809 | 543  |
| ECs2426 | threonyl-tRNA synthetase                                                 | 2400355 | 1929 |
| ECs2429 | 6-phosphofructokinase                                                    | 2406081 | 933  |
| ECs2430 | hypothetical protein                                                     | 2407114 | 291  |
| ECs2431 | hypothetical protein                                                     | 2407510 | 861  |
| ECs2432 | hypothetical protein                                                     | 2408411 | 537  |
| ECs2433 | 2-deoxyglucose-6-phosphatase                                             | 2409094 | 669  |
| ECs2434 | hypothetical protein                                                     | 2409925 | 591  |
| ECs2435 | hypothetical protein                                                     | 2410648 | 1392 |
| ECs2438 | hydroperoxidase II                                                       | 2413580 | 2262 |
| ECs2439 | hypothetical protein                                                     | 2415888 | 759  |
| ECs2440 | 6-phospho-beta-glucosidase                                               | 2416659 | 1353 |
| ECs2441 | DNA-binding transcriptional regulator ChbR                               | 2418117 | 843  |
| ECs2442 | PTS system N,N'-diacetylchitobiose-specific transporter subunit IIA      | 2418967 | 351  |
| ECs2444 | PTS system N,N'-diacetylchitobiose-specific transporter subunit IIB      | 2420811 | 321  |
| ECs2445 | OsmE family transcriptional regulator                                    | 2421431 | 339  |
| ECs2446 | NAD synthetase                                                           | 2421971 | 828  |
| ECs2447 | nucleotide excision repair endonuclease                                  | 2423028 | 888  |
| ECs2448 | hypothetical protein                                                     | 2423875 | 639  |
| ECs2449 | hypothetical protein                                                     | 2424653 | 486  |
| ECs2450 | succinylglutamate desuccinylase                                          | 2425467 | 969  |
| ECs2451 | succinylarginine dihydrolase                                             | 2426428 | 1344 |
| ECs2452 | succinylglutamic semialdehyde dehydrogenase                              | 2427768 | 1479 |
| ECs2453 | arginine succinyltransferase                                             | 2429243 | 1035 |
| ECs2454 | bifunctional succinylornithine transaminase/acetylornithine transaminase | 2430274 | 1221 |
| ECs2455 | exonuclease III                                                          | 2431940 | 807  |
| ECs2456 | hypothetical protein                                                     | 2432913 | 711  |
| ECs2457 | hypothetical protein                                                     | 2433628 | 678  |
| ECs2458 | hypothetical protein                                                     | 2434320 | 708  |
| ECs2459 | hypothetical protein                                                     | 2435027 | 549  |
| ECs2460 | ABC transporter substrate-binding protein                                | 2435582 | 1170 |
| ECs2461 | transport system permease                                                | 2436724 | 1536 |
| ECs2466 | hypothetical protein                                                     | 2441375 | 273  |
| ECs2467 | glutamate dehydrogenase                                                  | 2441883 | 1344 |
| ECs2470 | selenophosphate synthetase                                               | 2446477 | 1044 |
| ECs2472 | protease 4                                                               | 2448349 | 1857 |
| ECs2475 | nicotinamidase/pyrazinamidase                                            | 2452190 | 642  |
| ECs2486 | hypothetical protein                                                     | 2463304 | 273  |
| ECs2488 | glyceraldehyde-3-phosphate dehydrogenase                                 | 2464373 | 996  |
| ECs2489 | hypothetical protein                                                     | 2465452 | 885  |
| ECs2490 | aldehyde reductase                                                       | 2466387 | 855  |
| ECs2491 | scaffolding protein in the formation of a murein-synthesizing holoenzyme | 2467331 | 747  |
| ECs2492 | hypothetical protein                                                     | 2468513 | 1935 |
| ECs2493 | hypothetical protein                                                     | 2470560 | 1284 |
| ECs2495 | hypothetical protein                                                     | 2473646 | 1491 |
| ECs2496 | hypothetical protein                                                     | 2475179 | 504  |
| ECs2497 | hypothetical protein                                                     | 2475683 | 153  |
| ECs2498 | hypothetical protein                                                     | 2475957 | 447  |
| ECs2499 | AraC family transcriptional regulator                                    | 2476360 | 822  |
| ECs2501 | hypothetical protein                                                     | 2478514 | 348  |
| ECs2502 | hypothetical protein                                                     | 2478883 | 255  |
| ECs2503 | hypothetical protein                                                     | 2479320 | 849  |
| ECs2504 | hypothetical protein                                                     | 2480612 | 249  |
| ECs2507 | leucine export protein LeuE                                              | 2481725 | 639  |
| ECs2513 | ribonuclease D                                                           | 2488693 | 1128 |
| ECs2514 | long-chain-fatty-acid--CoA ligase                                        | 2489890 | 1686 |
| ECs2515 | outer membrane protein                                                   | 2491780 | 582  |
| ECs2516 | hypothetical protein                                                     | 2492401 | 696  |
| ECs2517 | hypothetical protein                                                     | 2493154 | 1911 |
| ECs2518 | hypothetical protein                                                     | 2495148 | 393  |
| ECs2520 | hypothetical protein                                                     | 2496381 | 180  |
| ECs2521 | para-aminobenzoate synthase component I                                  | 2496634 | 1362 |
| ECs2522 | hypothetical protein                                                     | 2497999 | 579  |
| ECs2523 | L-serine dehydratase 1                                                   | 2498761 | 1365 |
| ECs2525 | transporter                                                              | 2501858 | 1557 |
| ECs2526 | hypothetical protein                                                     | 2503402 | 210  |

|         |                                                                      |         |      |
|---------|----------------------------------------------------------------------|---------|------|
| ECs2527 | PTS system mannose-specific transporter subunit IIAB                 | 2503877 | 972  |
| ECs2528 | mannose-specific PTS enzyme IIC                                      | 2504911 | 801  |
| ECs2529 | PTS system mannose-specific transporter subunit IID                  | 2505715 | 861  |
| ECs2531 | hypothetical protein                                                 | 2507464 | 621  |
| ECs2533 | cold shock-like protein CspC                                         | 2509056 | 210  |
| ECs2534 | hypothetical protein                                                 | 2509278 | 144  |
| ECs2535 | hypothetical protein                                                 | 2510090 | 288  |
| ECs2536 | hypothetical protein                                                 | 2510452 | 144  |
| ECs2538 | transporter                                                          | 2512106 | 1374 |
| ECs2539 | heat shock protein HtpX                                              | 2513525 | 882  |
| ECs2540 | carboxy-terminal protease                                            | 2514598 | 2049 |
| ECs2541 | solute/DNA competence effector                                       | 2516666 | 699  |
| ECs2542 | hypothetical protein                                                 | 2517461 | 498  |
| ECs2543 | hypothetical protein                                                 | 2518088 | 1284 |
| ECs2544 | hypothetical protein                                                 | 2519334 | 2640 |
| ECs2545 | rRNA (cytosine-C(5)-)-methyltransferase RsmF                         | 2522048 | 1446 |
| ECs2546 | hypothetical protein                                                 | 2523596 | 252  |
| ECs2547 | hypothetical protein                                                 | 2523868 | 276  |
| ECs2548 | serine/threonine protein phosphatase 1                               | 2524144 | 657  |
| ECs2550 | resistance protein                                                   | 2525550 | 873  |
| ECs2551 | hypothetical protein                                                 | 2526426 | 375  |
| ECs2552 | DNA polymerase III subunit theta                                     | 2526939 | 231  |
| ECs2553 | hypothetical protein                                                 | 2527271 | 657  |
| ECs2554 | exodeoxyribonuclease X                                               | 2527951 | 663  |
| ECs2556 | hypothetical protein                                                 | 2530879 | 660  |
| ECs2558 | DNA damage-inducible protein YebG                                    | 2532288 | 291  |
| ECs2559 | phosphoribosylglycinamide formyltransferase 2                        | 2532712 | 1179 |
| ECs2560 | keto-hydroxyglutarate-aldolase/keto-deoxy- phosphogluconate aldolase | 2533946 | 642  |
| ECs2561 | phosphogluconate dehydratase                                         | 2534624 | 1812 |
| ECs2562 | glucose-6-phosphate 1-dehydrogenase                                  | 2536670 | 1476 |
| ECs2563 | DNA-binding transcriptional regulator HexR                           | 2538483 | 870  |
| ECs2564 | pyruvate kinase                                                      | 2539480 | 1443 |
| ECs2567 | high-affinity zinc transporter periplasmic protein                   | 2543482 | 933  |
| ECs2568 | high-affinity zinc transporter ATPase                                | 2544493 | 756  |
| ECs2569 | high-affinity zinc transporter membrane protein                      | 2545245 | 786  |
| ECs2570 | Holliday junction DNA helicase RuvB                                  | 2546276 | 1011 |
| ECs2571 | Holliday junction DNA helicase RuvA                                  | 2547295 | 612  |
| ECs2572 | hypothetical protein                                                 | 2548181 | 603  |
| ECs2573 | Holliday junction resolvase                                          | 2548785 | 522  |
| ECs2574 | hypothetical protein                                                 | 2549341 | 741  |
| ECs2575 | dATP pyrophosphohydrolase                                            | 2550110 | 453  |
| ECs2576 | aspartyl-tRNA synthetase                                             | 2550680 | 1773 |
| ECs2579 | hypothetical protein                                                 | 2554196 | 396  |
| ECs2580 | hypothetical protein                                                 | 2554632 | 744  |
| ECs2581 | hypothetical protein                                                 | 2555372 | 972  |
| ECs2582 | biotin sulfoxide reductase                                           | 2556508 | 2430 |
| ECs2583 | cytochrome C-type protein                                            | 2558962 | 1101 |
| ECs2585 | hypothetical protein                                                 | 2561210 | 567  |
| ECs2586 | arginyl-tRNA synthetase                                              | 2561992 | 1734 |
| ECs2588 | flagellar protein                                                    | 2564510 | 393  |
| ECs2590 | flagellar biosynthesis protein FlhB                                  | 2566973 | 1149 |
| ECs2591 | chemotaxis protein CheZ                                              | 2568323 | 645  |
| ECs2592 | chemotaxis regulatory protein CheY                                   | 2568978 | 390  |
| ECs2593 | chemotaxis-specific methylesterase                                   | 2569382 | 1050 |
| ECs2594 | chemotaxis methyltransferase CheR                                    | 2570434 | 861  |
| ECs2597 | purine-binding chemotaxis protein                                    | 2574764 | 504  |
| ECs2598 | chemotaxis protein CheA                                              | 2575288 | 1965 |
| ECs2599 | flagellar motor protein MotB                                         | 2577257 | 927  |
| ECs2600 | flagellar motor protein MotA                                         | 2578180 | 888  |
| ECs2601 | transcriptional activator FlhC                                       | 2579194 | 579  |
| ECs2602 | transcriptional activator FlhD                                       | 2579775 | 351  |
| ECs2603 | universal stress protein UspC                                        | 2580905 | 429  |
| ECs2604 | trehalose-6-phosphate synthase                                       | 2581340 | 1425 |
| ECs2605 | trehalose-6-phosphate phosphatase                                    | 2582739 | 801  |
| ECs2608 | L-arabinose transporter ATP-binding protein                          | 2584707 | 1515 |
| ECs2609 | L-arabinose-binding periplasmic protein                              | 2586291 | 990  |
| ECs2610 | ferritin                                                             | 2588077 | 504  |
| ECs2612 | hypothetical protein                                                 | 2589374 | 324  |
| ECs2613 | ferritin                                                             | 2589868 | 498  |
| ECs2614 | hypothetical protein                                                 | 2590402 | 240  |
| ECs2615 | tyrosine-specific transporter                                        | 2590833 | 1212 |
| ECs2616 | hypothetical protein                                                 | 2592106 | 666  |
| ECs2650 | phosphatidylglycerophosphate synthetase                              | 2614540 | 549  |
| ECs2653 | hypothetical protein                                                 | 2618089 | 225  |
| ECs2655 | amino-acid ABC transporter ATP-binding protein                       | 2619333 | 753  |
| ECs2656 | transport system permease                                            | 2620082 | 669  |
| ECs2660 | flagella biosynthesis protein FlhZ                                   | 2622743 | 588  |

|         |                                                                        |         |      |
|---------|------------------------------------------------------------------------|---------|------|
| ECs2661 | flagellar biosynthesis sigma factor                                    | 2623340 | 720  |
| ECs2664 | flagellar protein FliS                                                 | 2627824 | 411  |
| ECs2665 | flagellar biosynthesis protein FliT                                    | 2628234 | 366  |
| ECs2666 | alpha-amylase                                                          | 2628677 | 1488 |
| ECs2676 | flagellar hook-basal body protein FliE                                 | 2637184 | 315  |
| ECs2678 | flagellar motor switch protein G                                       | 2639364 | 996  |
| ECs2679 | flagellar assembly protein H                                           | 2640352 | 687  |
| ECs2681 | flagellar biosynthesis chaperone                                       | 2642492 | 444  |
| ECs2682 | flagellar hook-length control protein                                  | 2642932 | 1128 |
| ECs2683 | flagellar basal body-associated protein FliL                           | 2644164 | 465  |
| ECs2684 | flagellar motor switch protein FliM                                    | 2644633 | 1005 |
| ECs2686 | flagellar biosynthesis protein FliO                                    | 2646050 | 366  |
| ECs2687 | flagellar biosynthesis protein FliP                                    | 2646415 | 738  |
| ECs2688 | flagellar biosynthesis protein FliQ                                    | 2647162 | 270  |
| ECs2689 | flagellar biosynthesis protein FliR                                    | 2647439 | 786  |
| ECs2691 | hypothetical protein                                                   | 2649181 | 189  |
| ECs2692 | hypothetical protein                                                   | 2649529 | 231  |
| ECs2695 | hypothetical protein                                                   | 2652734 | 183  |
| ECs2696 | hypothetical protein                                                   | 2652995 | 918  |
| ECs2697 | hypothetical protein                                                   | 2654085 | 921  |
| ECs2698 | DNA mismatch endonuclease                                              | 2654994 | 471  |
| ECs2699 | DNA cytosine methylase                                                 | 2655445 | 1419 |
| ECs2706 | 2-component sensor protein                                             | 2661333 | 1359 |
| ECs2707 | transcriptional regulatory protein YedW                                | 2662691 | 672  |
| ECs2708 | hypothetical protein                                                   | 2663495 | 414  |
| ECs2709 | sulfite oxidase subunit YedY                                           | 2664016 | 1005 |
| ECs2710 | sulfite oxidase subunit YedZ                                           | 2665021 | 636  |
| ECs2711 | hypothetical protein                                                   | 2665913 | 651  |
| ECs2774 | hypothetical protein                                                   | 2712219 | 798  |
| ECs2780 | hypothetical protein                                                   | 2726332 | 717  |
| ECs2783 | transcriptional regulator Cbl                                          | 2729435 | 951  |
| ECs2784 | nitrogen assimilation transcriptional regulator                        | 2730487 | 918  |
| ECs2786 | nicotinate-nucleotide--dimethylbenzimidazole phosphoribosyltransferase | 2732858 | 1080 |
| ECs2787 | cobalamin synthase                                                     | 2733949 | 744  |
| ECs2816 | amino acid/amine transport protein                                     | 2758211 | 1365 |
| ECs2817 | LysR family transcriptional regulator                                  | 2759836 | 930  |
| ECs2818 | hypothetical protein                                                   | 2760811 | 825  |
| ECs2819 | his operon leader peptide                                              | 2762061 | 51   |
| ECs2820 | ATP phosphoribosyltransferase                                          | 2762257 | 900  |
| ECs2821 | histidinol dehydrogenase                                               | 2763162 | 1305 |
| ECs2866 | tyrosine phosphatase                                                   | 2811030 | 444  |
| ECs2867 | polysaccharide export protein                                          | 2811479 | 1140 |
| ECs2868 | transporter                                                            | 2813277 | 1584 |
| ECs2871 | assembly protein                                                       | 2815606 | 1854 |
| ECs2872 | deoxycytidine triphosphate deaminase                                   | 2817481 | 582  |
| ECs2873 | uridine kinase                                                         | 2818154 | 642  |
| ECs2878 | chaperone                                                              | 2823515 | 1353 |
| ECs2880 | hypothetical protein                                                   | 2826817 | 762  |
| ECs2881 | hypothetical protein                                                   | 2827575 | 660  |
| ECs2882 | multidrug efflux system subunit MdtA                                   | 2829450 | 1248 |
| ECs2883 | multidrug efflux system subunit MdtB                                   | 2830697 | 3123 |
| ECs2884 | multidrug efflux system subunit MdtC                                   | 2833820 | 3078 |
| ECs2886 | signal transduction histidine-protein kinase BaeS                      | 2838310 | 1404 |
| ECs2887 | BaeR family transcriptional regulator                                  | 2839710 | 723  |
| ECs2888 | hypothetical protein                                                   | 2840623 | 333  |
| ECs2889 | hypothetical protein                                                   | 2841103 | 1362 |
| ECs2892 | lipid kinase                                                           | 2843517 | 900  |
| ECs2894 | galactitol-1-phosphate dehydrogenase                                   | 2845377 | 1041 |
| ECs2897 | PTS system galactitol-specific transporter subunit IIA                 | 2848139 | 453  |
| ECs2900 | fructose-bisphosphate aldolase                                         | 2851045 | 1053 |
| ECs2902 | hypothetical protein                                                   | 2853628 | 1005 |
| ECs2903 | kinase                                                                 | 2854629 | 966  |
| ECs2904 | transcriptional regulator                                              | 2855568 | 747  |
| ECs2905 | hypothetical protein                                                   | 2856366 | 828  |
| ECs2906 | phosphomethylpyrimidine kinase                                         | 2857249 | 801  |
| ECs2907 | hydroxyethylthiazole kinase                                            | 2858046 | 789  |
| ECs2911 | hypothetical protein                                                   | 2861239 | 273  |
| ECs2913 | hypothetical protein                                                   | 2862689 | 339  |
| ECs2919 | ATPase                                                                 | 2868789 | 1110 |
| ECs2935 | hypothetical protein                                                   | 2892718 | 471  |
| ECs2936 | two-component response-regulatory protein YehT                         | 2893235 | 720  |
| ECs3014 | transcriptional regulator                                              | 2943822 | 648  |
| ECs3015 | transport system permease                                              | 2944617 | 732  |
| ECs3016 | ABC transporter ATP-binding protein                                    | 2945353 | 927  |
| ECs3017 | transport system permease                                              | 2946272 | 1158 |
| ECs3018 | transport system permease                                              | 2947436 | 918  |
| ECs3019 | beta-D-glucoside glucohydrolase                                        | 2948605 | 2298 |

|         |                                                                                           |         |      |
|---------|-------------------------------------------------------------------------------------------|---------|------|
| ECs3020 | D-lactate dehydrogenase                                                                   | 2951098 | 1716 |
| ECs3022 | hypothetical protein                                                                      | 2953957 | 612  |
| ECs3023 | hypothetical protein                                                                      | 2954678 | 615  |
| ECs3024 | acetoin dehydrogenase                                                                     | 2955422 | 762  |
| ECs3033 | hypothetical protein                                                                      | 2965618 | 399  |
| ECs3035 | cytidine deaminase                                                                        | 2966838 | 885  |
| ECs3036 | hypothetical protein                                                                      | 2967872 | 720  |
| ECs3037 | hypothetical protein                                                                      | 2968594 | 240  |
| ECs3038 | oxidoreductase                                                                            | 2969027 | 1239 |
| ECs3040 | beta-methylgalactoside transporter inner membrane protein                                 | 2971737 | 1011 |
| ECs3041 | galactose/methyl galactoside transporter ATP-binding protein                              | 2972763 | 1521 |
| ECs3042 | galactose-binding transport protein                                                       | 2974344 | 999  |
| ECs3043 | DNA-binding transcriptional regulator GalS                                                | 2975621 | 1041 |
| ECs3044 | hypothetical protein                                                                      | 2976803 | 1158 |
| ECs3045 | GTP cyclohydrolase I                                                                      | 2977977 | 669  |
| ECs3046 | esterase                                                                                  | 2978903 | 837  |
| ECs3048 | lysine transporter                                                                        | 2982042 | 1470 |
| ECs3049 | DNA-binding transcriptional regulator                                                     | 2983716 | 882  |
| ECs3050 | hypothetical protein                                                                      | 2984696 | 1050 |
| ECs3051 | endonuclease IV                                                                           | 2985819 | 858  |
| ECs3054 | ribonucleoside hydrolase 2                                                                | 2989173 | 942  |
| ECs3055 | YeiL family transcriptional regulator                                                     | 2990244 | 699  |
| ECs3059 | PTS system fructose-specific transporter subunit IIBC                                     | 2994648 | 1692 |
| ECs3060 | 1-phosphofructokinase                                                                     | 2996356 | 939  |
| ECs3061 | bifunctional PTS system fructose-specific transporter subunit IIA/HP <sub>r</sub> protein | 2997294 | 1131 |
| ECs3062 | sugar efflux transport protein                                                            | 2998792 | 1182 |
| ECs3065 | hypothetical protein                                                                      | 3002758 | 987  |
| ECs3066 | hypothetical protein                                                                      | 3003783 | 714  |
| ECs3067 | outer membrane lipoprotein                                                                | 3004909 | 567  |
| ECs3070 | transport system permease                                                                 | 3009109 | 1095 |
| ECs3072 | ABC transporter ATP-binding protein                                                       | 3011230 | 1590 |
| ECs3073 | hypothetical protein                                                                      | 3012823 | 345  |
| ECs3074 | bicyclomycin/multidrug efflux system protein                                              | 3013500 | 1191 |
| ECs3075 | 16S rRNA pseudouridylyl synthase A                                                        | 3014718 | 696  |
| ECs3077 | 50S ribosomal protein L25                                                                 | 3017447 | 285  |
| ECs3078 | nucleoid-associated protein NdpA                                                          | 3017870 | 1008 |
| ECs3079 | hypothetical protein                                                                      | 3019059 | 228  |
| ECs3082 | transcriptional regulator NarP                                                            | 3024229 | 648  |
| ECs3083 | CcmH precursor                                                                            | 3024911 | 1053 |
| ECs3084 | DsbE                                                                                      | 3025960 | 558  |
| ECs3085 | cytochrome c-type biogenesis protein                                                      | 3026514 | 1944 |
| ECs3086 | cytochrome c-type biogenesis protein CcmE                                                 | 3028454 | 480  |
| ECs3087 | heme exporter protein C                                                                   | 3028930 | 210  |
| ECs3088 | heme exporter protein C                                                                   | 3029136 | 738  |
| ECs3089 | heme exporter protein B                                                                   | 3029915 | 663  |
| ECs3090 | cytochrome c biogenesis protein CcmA                                                      | 3030574 | 618  |
| ECs3091 | cytochrome c-type protein NapC                                                            | 3031210 | 603  |
| ECs3092 | citrate reductase cytochrome c-type subunit                                               | 3031822 | 450  |
| ECs3093 | quinol dehydrogenase membrane component                                                   | 3032268 | 864  |
| ECs3094 | quinol dehydrogenase periplasmic component                                                | 3033118 | 696  |
| ECs3095 | nitrate reductase catalytic subunit                                                       | 3033820 | 2487 |
| ECs3096 | assembly protein for periplasmic nitrate reductase                                        | 3036303 | 264  |
| ECs3097 | ferredoxin-type protein                                                                   | 3036556 | 495  |
| ECs3098 | ecotin                                                                                    | 3037457 | 489  |
| ECs3099 | malate:quinone oxidoreductase                                                             | 3038095 | 1647 |
| ECs3102 | O6-methylguanine-DNA methyltransferase                                                    | 3042328 | 1065 |
| ECs3103 | thiamine biosynthesis lipoprotein ApbE                                                    | 3043466 | 1056 |
| ECs3105 | phosphotransfer intermediate protein in two-component regulatory system with RcsBC        | 3046475 | 2673 |
| ECs3106 | transcriptional regulator RcsB                                                            | 3049164 | 651  |
| ECs3107 | hybrid sensory kinase in two-component regulatory system with RcsB and YojN               | 3050014 | 2850 |
| ECs3113 | hypothetical protein                                                                      | 3060727 | 1599 |
| ECs3114 | DNA gyrase subunit A                                                                      | 3062563 | 2628 |
| ECs3115 | 3-demethylubiquinone-9 3-methyltransferase                                                | 3065337 | 723  |
| ECs3117 | ribonucleotide-diphosphate reductase subunit alpha                                        | 3070648 | 2286 |
| ECs3118 | ribonucleotide-diphosphate reductase subunit beta                                         | 3073160 | 1131 |
| ECs3119 | 2Fe-2S ferredoxin                                                                         | 3074290 | 255  |
| ECs3120 | hypothetical protein                                                                      | 3074598 | 651  |
| ECs3124 | glycerophosphodiester phosphodiesterase                                                   | 3079307 | 1077 |
| ECs3125 | sn-glycerol-3-phosphate transporter                                                       | 3080388 | 1359 |
| ECs3126 | sn-glycerol-3-phosphate dehydrogenase subunit A                                           | 3082019 | 1629 |
| ECs3127 | anaerobic glycerol-3-phosphate dehydrogenase subunit B                                    | 3083637 | 1260 |
| ECs3128 | sn-glycerol-3-phosphate dehydrogenase subunit C                                           | 3084893 | 1191 |
| ECs3138 | hypothetical protein                                                                      | 3094246 | 543  |
| ECs3139 | hypothetical protein                                                                      | 3095067 | 426  |
| ECs3142 | undecaprenyl phosphate 4-deoxy-4-formamido-L-arabinose transferase                        | 3097584 | 969  |
| ECs3145 | 4-amino-4-deoxy-L-arabinose transferase                                                   | 3101421 | 1653 |
| ECs3146 | hypothetical protein                                                                      | 3103405 | 387  |

|         |                                                                          |         |      |
|---------|--------------------------------------------------------------------------|---------|------|
| ECs3148 | O-succinylbenzoic acid--CoA ligase                                       | 3104161 | 1356 |
| ECs3150 | naphthoate synthase                                                      | 3106475 | 858  |
| ECs3151 | acyl-CoA thioester hydrolase                                             | 3107347 | 759  |
| ECs3152 | 2-succinyl-5-enolpyruvyl-6-hydroxy-3- cyclohexene-1-carboxylate synthase | 3108102 | 1671 |
| ECs3153 | menaquinone-specific isochorismate synthase                              | 3109861 | 1296 |
| ECs3154 | hypothetical protein                                                     | 3111235 | 306  |
| ECs3160 | NADH dehydrogenase subunit N                                             | 3116151 | 1458 |
| ECs3161 | NADH dehydrogenase subunit M                                             | 3117615 | 1530 |
| ECs3162 | NADH dehydrogenase subunit L                                             | 3119375 | 1842 |
| ECs3163 | NADH dehydrogenase subunit K                                             | 3121213 | 303  |
| ECs3164 | NADH dehydrogenase subunit J                                             | 3121512 | 555  |
| ECs3165 | NADH dehydrogenase subunit I                                             | 3122078 | 543  |
| ECs3166 | NADH dehydrogenase subunit H                                             | 3122635 | 978  |
| ECs3167 | NADH dehydrogenase subunit G                                             | 3123609 | 2727 |
| ECs3168 | NADH dehydrogenase I subunit F                                           | 3126388 | 1338 |
| ECs3169 | NADH dehydrogenase subunit E                                             | 3127722 | 501  |
| ECs3170 | bifunctional NADH:ubiquinone oxidoreductase subunit C/D                  | 3128225 | 1803 |
| ECs3171 | NADH dehydrogenase subunit B                                             | 3130121 | 663  |
| ECs3172 | NADH dehydrogenase subunit A                                             | 3130799 | 438  |
| ECs3173 | LysR family transcriptional regulator                                    | 3131873 | 939  |
| ECs3174 | aminotransferase                                                         | 3133731 | 1218 |
| ECs3175 | hypothetical protein                                                     | 3135032 | 600  |
| ECs3176 | transporter                                                              | 3135690 | 1833 |
| ECs3177 | phosphatase                                                              | 3137609 | 651  |
| ECs3178 | hypothetical protein                                                     | 3138270 | 495  |
| ECs3180 | acetate kinase                                                           | 3139641 | 1203 |
| ECs3181 | phosphate acetyltransferase                                              | 3140918 | 2145 |
| ECs3182 | hypothetical protein                                                     | 3143252 | 1521 |
| ECs3183 | regulator                                                                | 3144805 | 543  |
| ECs3184 | phosphodiesterase                                                        | 3145405 | 552  |
| ECs3185 | hypothetical protein                                                     | 3146012 | 645  |
| ECs3186 | glutathione S-transferase                                                | 3146792 | 648  |
| ECs3187 | D-erythro-7,8-dihydroneopterin triphosphate 2'-epimerase                 | 3147496 | 363  |
| ECs3188 | sugar nucleotide epimerase                                               | 3147879 | 894  |
| ECs3189 | hypothetical protein                                                     | 3148820 | 891  |
| ECs3190 | histidine/lysine/arginine/ornithine transporter subunit                  | 3149907 | 774  |
| ECs3191 | histidine transport system membrane protein M                            | 3150688 | 717  |
| ECs3192 | histidine transport system permease                                      | 3151401 | 687  |
| ECs3193 | histidine transport system histidine-binding periplasmic protein         | 3152177 | 783  |
| ECs3195 | 3-octaprenyl-4-hydroxybenzoate carboxy-lyase                             | 3154228 | 570  |
| ECs3196 | amidophosphoribosyltransferase                                           | 3154892 | 1518 |
| ECs3197 | colicin V production protein                                             | 3156446 | 489  |
| ECs3198 | hypothetical protein                                                     | 3157375 | 663  |
| ECs3199 | bifunctional folylpolyglutamate synthase/ dihydrofolate synthase         | 3158027 | 1269 |
| ECs3200 | acetyl-CoA carboxylase subunit beta                                      | 3159365 | 915  |
| ECs3202 | tRNA pseudouridine synthase A                                            | 3161177 | 813  |
| ECs3203 | semialdehyde dehydrogenase                                               | 3161989 | 1014 |
| ECs3204 | erythronate-4-phosphate dehydrogenase                                    | 3163068 | 1137 |
| ECs3207 | 3-oxoacyl-ACP synthase                                                   | 3166748 | 1221 |
| ECs3208 | 5-methylaminomethyl-2-thiouridine methyltransferase                      | 3168127 | 2007 |
| ECs3209 | hypothetical protein                                                     | 3170254 | 279  |
| ECs3210 | transporting ATPase                                                      | 3170566 | 549  |
| ECs3211 | hypothetical protein                                                     | 3171114 | 810  |
| ECs3212 | penicillin-insensitive murein endopeptidase                              | 3171923 | 825  |
| ECs3213 | chorismate synthase                                                      | 3172751 | 1086 |
| ECs3215 | N5-glutamine S-adenosyl-L-methionine-dependent methyltransferase         | 3173871 | 933  |
| ECs3223 | phosphohistidine phosphatase                                             | 3182742 | 486  |
| ECs3224 | multifunctional fatty acid oxidation complex subunit alpha               | 3183430 | 2145 |
| ECs3225 | 3-ketoacyl-CoA thiolase                                                  | 3185574 | 1311 |
| ECs3226 | hypothetical protein                                                     | 3187064 | 285  |
| ECs3229 | lipoprotein precursor                                                    | 3190851 | 756  |
| ECs3230 | transport                                                                | 3191900 | 933  |
| ECs3254 | formyl-coenzyme A transferase                                            | 3220137 | 1251 |
| ECs3255 | hypothetical protein                                                     | 3221900 | 636  |
| ECs3256 | hypothetical protein                                                     | 3222831 | 276  |
| ECs3257 | hypothetical protein                                                     | 3223183 | 243  |
| ECs3258 | lipid A biosynthesis palmitoleoyl acyltransferase                        | 3223778 | 921  |
| ECs3259 | aminotransferase                                                         | 3225190 | 1239 |
| ECs3261 | 2-component transcriptional regulator                                    | 3228517 | 735  |
| ECs3262 | AraC family transcriptional regulator                                    | 3229264 | 858  |
| ECs3264 | exoaminopeptidase                                                        | 3232644 | 1038 |
| ECs3265 | aminopeptidase                                                           | 3233681 | 1086 |
| ECs3266 | transporter                                                              | 3234781 | 1248 |
| ECs3267 | PTS system enzyme IIB component                                          | 3236050 | 327  |
| ECs3268 | glucokinase                                                              | 3236595 | 966  |
| ECs3269 | hypothetical protein                                                     | 3237764 | 1257 |
| ECs3270 | hypothetical protein                                                     | 3239135 | 327  |



|         |                                                                  |         |      |
|---------|------------------------------------------------------------------|---------|------|
| ECs3271 | manganese transport protein MntH                                 | 3239601 | 1239 |
| ECs3272 | permease of transport system for 3 nucleosides                   | 3241175 | 1203 |
| ECs3273 | hypothetical protein                                             | 3242427 | 2190 |
| ECs3274 | hypothetical protein                                             | 3245235 | 360  |
| ECs3278 | glutamyl-tRNA synthetase                                         | 3247787 | 1416 |
| ECs3282 | cytochrome oxidase                                               | 3251325 | 999  |
| ECs3283 | NAD-dependent DNA ligase LigA                                    | 3252540 | 2016 |
| ECs3284 | cell division protein ZipA                                       | 3254626 | 999  |
| ECs3285 | sulfate transport protein CysZ                                   | 3255854 | 762  |
| ECs3286 | cysteine synthase A                                              | 3256800 | 972  |
| ECs3287 | PTS system phosphohistidinoprotein-hexose phosphotransferase Hpr | 3258155 | 258  |
| ECs3290 | pyridoxal kinase                                                 | 3260777 | 852  |
| ECs3292 | cysteine synthase B                                              | 3262103 | 912  |
| ECs3293 | sulfate/thiosulfate transporter subunit                          | 3263148 | 1098 |
| ECs3294 | sulfate/thiosulfate transporter permease                         | 3264235 | 876  |
| ECs3295 | sulfate/thiosulfate transporter subunit                          | 3265110 | 834  |
| ECs3296 | thiosulfate transporter subunit                                  | 3265943 | 1017 |
| ECs3297 | short chain dehydrogenase                                        | 3267117 | 792  |
| ECs3299 | N-acetylmuramic acid 6-phosphate etherase                        | 3269058 | 897  |
| ECs3302 | hypothetical protein                                             | 3272749 | 900  |
| ECs3304 | hypothetical protein                                             | 3274380 | 450  |
| ECs3305 | acetyltransferase                                                | 3274816 | 426  |
| ECs3306 | N-acetylmuramoyl-l-alanine amidase I                             | 3275455 | 870  |
| ECs3307 | coproporphyrinogen III oxidase                                   | 3276328 | 900  |
| ECs3308 | transcriptional regulator EutR                                   | 3277233 | 1053 |
| ECs3309 | hypothetical protein                                             | 3278331 | 501  |
| ECs3310 | hypothetical protein                                             | 3278844 | 660  |
| ECs3312 | ethanolamine ammonia-lyase heavy chain                           | 3280421 | 1362 |
| ECs3315 | hypothetical protein                                             | 3284520 | 1188 |
| ECs3317 | EutE                                                             | 3286544 | 1404 |
| ECs3319 | detox protein                                                    | 3288353 | 294  |
| ECs3320 | phosphotransacetylase                                            | 3288685 | 1017 |
| ECs3322 | ethanolamine utilization protein EutQ                            | 3290426 | 702  |
| ECs3323 | hypothetical protein                                             | 3291102 | 480  |
| ECs3324 | hypothetical protein                                             | 3291594 | 336  |
| ECs3325 | malic enzyme                                                     | 3292222 | 2280 |
| ECs3329 | hypothetical protein                                             | 3299027 | 576  |
| ECs3330 | oxidoreductase Fe-S binding subunit                              | 3299670 | 1980 |
| ECs3331 | nitrate/nitrite sensor protein NarQ                              | 3301855 | 1701 |
| ECs3332 | aminoglycoside/multidrug efflux system                           | 3303719 | 3114 |
| ECs3333 | hypothetical protein                                             | 3307371 | 357  |
| ECs3334 | succinyl-diaminopimelate desuccinylase                           | 3307731 | 1128 |
| ECs3335 | esterase                                                         | 3309167 | 699  |
| ECs3336 | hypothetical protein                                             | 3309939 | 2016 |
| ECs3337 | hypothetical protein                                             | 3311969 | 864  |
| ECs3338 | phosphoribosylaminoimidazole-succinocarboxamide synthase         | 3313000 | 714  |
| ECs3339 | lipoprotein                                                      | 3313926 | 1035 |
| ECs3340 | dihydrodipicolinate synthase                                     | 3314977 | 879  |
| ECs3341 | glycine cleavage system transcriptional repressor                | 3316001 | 573  |
| ECs3342 | thioredoxin-dependent thiol peroxidase                           | 3316573 | 471  |
| ECs3355 | permease                                                         | 3330963 | 1062 |
| ECs3358 | DNA replication initiation factor                                | 3334218 | 747  |
| ECs3359 | uracil transporter                                               | 3335014 | 1290 |
| ECs3360 | uracil phosphoribosyltransferase                                 | 3336389 | 627  |
| ECs3361 | phosphoribosylaminoimidazole synthetase                          | 3337340 | 1038 |
| ECs3362 | phosphoribosylglycinamide formyltransferase                      | 3338377 | 639  |
| ECs3363 | polyphosphate kinase                                             | 3339186 | 2067 |
| ECs3364 | exopolyphosphatase                                               | 3341257 | 1542 |
| ECs3366 | hypothetical protein                                             | 3345432 | 192  |
| ECs3367 | outer membrane lipoprotein                                       | 3345934 | 519  |
| ECs3368 | hypothetical protein                                             | 3346468 | 540  |
| ECs3369 | GMP synthase                                                     | 3347100 | 1578 |
| ECs3370 | inosine 5'-monophosphate dehydrogenase                           | 3348746 | 1467 |
| ECs3373 | GTP-binding protein EngA                                         | 3352025 | 1473 |
| ECs3374 | outer membrane protein assembly complex subunit YfgL             | 3353615 | 1179 |
| ECs3375 | hypothetical protein                                             | 3354804 | 621  |
| ECs3376 | histidyl-tRNA synthetase                                         | 3355442 | 1275 |
| ECs3377 | 4-hydroxy-3-methylbut-2-en-1-yl diphosphate synthase             | 3356827 | 1119 |
| ECs3380 | nucleoside diphosphate kinase                                    | 3360574 | 432  |
| ECs3386 | hypothetical protein                                             | 3368298 | 4962 |
| ECs3387 | 3-mercaptopyruvate sulfurtransferase                             | 3373466 | 846  |
| ECs3390 | hypothetical protein                                             | 3377191 | 201  |
| ECs3391 | [2FE-2S] ferredoxin                                              | 3377403 | 336  |
| ECs3392 | chaperone protein HscA                                           | 3377740 | 1851 |
| ECs3393 | co-chaperone HscB                                                | 3379607 | 516  |
| ECs3394 | iron-sulfur cluster assembly protein                             | 3380218 | 324  |
| ECs3395 | scaffold protein                                                 | 3380558 | 387  |

|         |                                                         |         |      |
|---------|---------------------------------------------------------|---------|------|
| ECs3396 | cysteine desulfurase                                    | 3380972 | 1215 |
| ECs3397 | DNA-binding transcriptional regulator IscR              | 3382298 | 489  |
| ECs3399 | inositol monophosphatase                                | 3383943 | 804  |
| ECs3400 | hypothetical protein                                    | 3384891 | 855  |
| ECs3401 | stationary phase inducible protein CsiE                 | 3385936 | 1281 |
| ECs3402 | 3-phenylpropionic acid transporter                      | 3387208 | 1140 |
| ECs3409 | hypothetical protein                                    | 3393847 | 423  |
| ECs3411 | hypothetical protein                                    | 3395201 | 789  |
| ECs3412 | transport system permease                               | 3396328 | 999  |
| ECs3415 | hypothetical protein                                    | 3399965 | 3375 |
| ECs3417 | serine hydroxymethyltransferase                         | 3404620 | 1254 |
| ECs3418 | nitric oxide dioxygenase                                | 3406201 | 1191 |
| ECs3419 | nitrogen regulatory protein P-II 1                      | 3407436 | 339  |
| ECs3420 | 2-component transcriptional regulator                   | 3407835 | 1335 |
| ECs3423 | phosphoribosylformylglycinamide synthase                | 3412040 | 3888 |
| ECs3424 | transglycosylase                                        | 3416322 | 1419 |
| ECs3425 | tRNA-specific adenosine deaminase                       | 3417737 | 537  |
| ECs3426 | hypothetical protein                                    | 3418298 | 636  |
| ECs3427 | DNA-binding transcriptional regulator                   | 3419142 | 849  |
| ECs3429 | 4'-phosphopantetheinyl transferase                      | 3421002 | 381  |
| ECs3430 | pyridoxine 5'-phosphate synthase                        | 3421382 | 732  |
| ECs3431 | DNA repair protein RecO                                 | 3422125 | 729  |
| ECs3432 | GTP-binding protein Era                                 | 3422865 | 906  |
| ECs3433 | ribonuclease III                                        | 3423767 | 681  |
| ECs3434 | signal peptidase I                                      | 3424720 | 975  |
| ECs3435 | GTP-binding protein LepA                                | 3425710 | 1800 |
| ECs3436 | SoxR reducing system protein RseC                       | 3427707 | 480  |
| ECs3437 | periplasmic negative regulator of sigmaE                | 3428183 | 957  |
| ECs3439 | RNA polymerase sigma factor RpoE                        | 3429810 | 576  |
| ECs3440 | L-aspartate oxidase                                     | 3430793 | 1623 |
| ECs3441 | hypothetical protein                                    | 3432400 | 858  |
| ECs3443 | LysR family transcriptional regulator                   | 3434636 | 882  |
| ECs3445 | autonomous glycyl radical cofactor GrcA                 | 3436263 | 384  |
| ECs3447 | methyltransferase                                       | 3437689 | 1038 |
| ECs3448 | thioredoxin 2                                           | 3438933 | 420  |
| ECs3449 | hypothetical protein                                    | 3439421 | 699  |
| ECs3452 | phosphatidylserine synthase                             | 3442926 | 1356 |
| ECs3453 | hypothetical protein                                    | 3444378 | 273  |
| ECs3454 | alpha-ketoglutarate transporter                         | 3444647 | 1299 |
| ECs3455 | protein disaggregation chaperone                        | 3451719 | 2574 |
| ECs3456 | hypothetical protein                                    | 3454422 | 732  |
| ECs3457 | 23S rRNA pseudouridine synthase D                       | 3455150 | 981  |
| ECs3458 | outer membrane protein assembly complex subunit YfiO    | 3456265 | 738  |
| ECs3460 | translation inhibitor protein RaiA                      | 3457273 | 342  |
| ECs3462 | bifunctional chorismate mutase/prephenate dehydratase   | 3457864 | 1161 |
| ECs3463 | bifunctional chorismate mutase/prephenate dehydrogenase | 3459067 | 1122 |
| ECs3464 | phospho-2-dehydro-3-deoxyheptonate aldolase             | 3460199 | 1071 |
| ECs3465 | hypothetical protein                                    | 3461440 | 405  |
| ECs3466 | hypothetical protein                                    | 3461994 | 519  |
| ECs3467 | hypothetical protein                                    | 3462502 | 1227 |
| ECs3469 | 50S ribosomal protein L19                               | 3464303 | 348  |
| ECs3470 | tRNA (guanine-N(1)-)-methyltransferase                  | 3464692 | 768  |
| ECs3471 | 16S rRNA-processing protein RimM                        | 3465490 | 549  |
| ECs3472 | 30S ribosomal protein S16                               | 3466057 | 249  |
| ECs3473 | signal recognition particle protein                     | 3466442 | 1362 |
| ECs3474 | hypothetical protein                                    | 3467970 | 792  |
| ECs3476 | heat shock protein GrpE                                 | 3470124 | 594  |
| ECs3478 | recombination and repair protein                        | 3471804 | 1662 |
| ECs3479 | small membrane protein A                                | 3473803 | 153  |
| ECs3480 | hypothetical protein                                    | 3474017 | 291  |
| ECs3481 | hypothetical protein                                    | 3474297 | 477  |
| ECs3482 | SsrA-binding protein                                    | 3474905 | 483  |
| ECs3520 | hypothetical protein                                    | 3511172 | 978  |
| ECs3522 | succinate-semialdehyde dehydrogenase I                  | 3513460 | 1449 |
| ECs3523 | 4-aminobutyrate aminotransferase                        | 3514922 | 1281 |
| ECs3524 | gamma-aminobutyrate transporter                         | 3516440 | 1401 |
| ECs3525 | DNA-binding transcriptional regulator CsiR              | 3517861 | 663  |
| ECs3526 | LysM domain/BON superfamily protein                     | 3518524 | 450  |
| ECs3527 | hypothetical protein                                    | 3519057 | 159  |
| ECs3528 | hypothetical protein                                    | 3519398 | 300  |
| ECs3529 | hypothetical protein                                    | 3519707 | 519  |
| ECs3530 | DNA binding protein                                     | 3520278 | 405  |
| ECs3531 | hypothetical protein                                    | 3521350 | 450  |
| ECs3532 | hypothetical protein                                    | 3521836 | 345  |
| ECs3533 | hypothetical protein                                    | 3522332 | 330  |
| ECs3536 | glutaredoxin-like protein                               | 3524873 | 246  |
| ECs3537 | ribonucleotide reductase stimulatory protein            | 3525115 | 411  |

|         |                                                            |         |      |
|---------|------------------------------------------------------------|---------|------|
| ECs3538 | ribonucleotide-diphosphate reductase subunit alpha         | 3525498 | 2145 |
| ECs3539 | ribonucleotide-diphosphate reductase subunit beta          | 3527652 | 960  |
| ECs3540 | glycine betaine transporter ATP-binding protein            | 3528967 | 1203 |
| ECs3541 | glycine betaine transporter membrane protein               | 3530162 | 1065 |
| ECs3542 | glycine betaine transporter periplasmic subunit            | 3531283 | 993  |
| ECs3544 | hypothetical protein                                       | 3533775 | 738  |
| ECs3545 | hypothetical protein                                       | 3534502 | 336  |
| ECs3546 | transcriptional repressor MprA                             | 3534928 | 531  |
| ECs3547 | multidrug resistance secretion protein                     | 3535585 | 1173 |
| ECs3548 | multidrug resistance protein B                             | 3536774 | 1539 |
| ECs3549 | S-ribosylhomocysteinase                                    | 3538376 | 516  |
| ECs3550 | glutamate--cysteine ligase                                 | 3539041 | 1557 |
| ECs3552 | fructose-1-phosphatase                                     | 3541095 | 567  |
| ECs3553 | carbon storage regulator                                   | 3542889 | 186  |
| ECs3554 | alanyl-tRNA synthetase                                     | 3543309 | 2631 |
| ECs3555 | recombination regulator RecX                               | 3546067 | 501  |
| ECs3556 | recombinase A                                              | 3546635 | 1062 |
| ECs3557 | competence damage-inducible protein A                      | 3547776 | 498  |
| ECs3564 | D-arabinose 5-phosphate isomerase                          | 3553736 | 966  |
| ECs3565 | anaerobic nitric oxide reductase transcriptional regulator | 3554698 | 1515 |
| ECs3567 | nitric oxide reductase                                     | 3557631 | 1134 |
| ECs3568 | transcriptional regulatory protein                         | 3558892 | 2253 |
| ECs3569 | electron transport protein HydN                            | 3561297 | 528  |
| ECs3573 | hydrogenase 3 maturation protease                          | 3566257 | 471  |
| ECs3574 | formate hydrogenlyase maturation protein                   | 3566720 | 411  |
| ECs3576 | formate hydrogenlyase complex iron-sulfur subunit          | 3567894 | 543  |
| ECs3577 | hydrogenase 3 large subunit                                | 3568446 | 1710 |
| ECs3578 | membrane-spanning protein of hydrogenase 3                 | 3570173 | 924  |
| ECs3579 | formate hydrogenlyase subunit 3                            | 3571099 | 1827 |
| ECs3580 | formate hydrogenlyase subunit-7 component B                | 3572922 | 612  |
| ECs3581 | formate hydrogenlyase regulatory protein HycA              | 3573658 | 462  |
| ECs3582 | hydrogenase nickel incorporation protein                   | 3574331 | 351  |
| ECs3583 | hydrogenase nickel incorporation protein HypB              | 3574685 | 873  |
| ECs3584 | hydrogenase assembly chaperone                             | 3575548 | 273  |
| ECs3585 | hypothetical protein                                       | 3575820 | 1122 |
| ECs3586 | hypothetical protein                                       | 3576980 | 969  |
| ECs3587 | formate hydrogenlyase transcriptional activator            | 3578022 | 2079 |
| ECs3598 | stationary phase survival protein SurE                     | 3590036 | 762  |
| ECs3599 | tRNA pseudouridine synthase D                              | 3590778 | 1050 |
| ECs3600 | 2-C-methyl-D-erythritol 2,4-cyclodiphosphate synthase      | 3591824 | 480  |
| ECs3601 | 2-C-methyl-D-erythritol 4-phosphate cytidyltransferase     | 3592303 | 711  |
| ECs3602 | cell division protein FtsB                                 | 3593032 | 312  |
| ECs3604 | adenylsulfate kinase                                       | 3593910 | 606  |
| ECs3605 | sulfate adenyltransferase subunit 1                        | 3594515 | 1428 |
| ECs3606 | sulfate adenyltransferase subunit 2                        | 3595944 | 909  |
| ECs3617 | phosphoadenosine phosphosulfate reductase                  | 3607697 | 735  |
| ECs3618 | sulfite reductase subunit beta                             | 3608505 | 1713 |
| ECs3619 | sulfite reductase subunit alpha                            | 3610217 | 1800 |
| ECs3620 | 6-pyruvoyl tetrahydrobiopterin synthase                    | 3612332 | 366  |
| ECs3623 | anti-terminator regulatory protein                         | 3614314 | 576  |
| ECs3629 | hypothetical protein                                       | 3618081 | 1455 |
| ECs3631 | transporter                                                | 3620709 | 1278 |
| ECs3639 | phosphopyruvate hydratase                                  | 3629042 | 1299 |
| ECs3640 | CTP synthetase                                             | 3630428 | 1638 |
| ECs3641 | nucleoside triphosphate pyrophosphohydrolase               | 3632293 | 792  |
| ECs3644 | GDP/GTP pyrophosphokinase                                  | 3633816 | 2235 |
| ECs3647 | glucarate dehydratase                                      | 3640445 | 1341 |
| ECs3648 | glucarate dehydratase                                      | 3641806 | 1023 |
| ECs3649 | transporter                                                | 3643148 | 1353 |
| ECs3650 | flavodoxin                                                 | 3644935 | 450  |
| ECs3651 | tRNA pseudouridine synthase C                              | 3645402 | 783  |
| ECs3652 | hypothetical protein                                       | 3646184 | 330  |
| ECs3653 | SecY interacting protein Syd                               | 3647135 | 546  |
| ECs3654 | 7-cyano-7-deazaguanine reductase                           | 3647748 | 849  |
| ECs3655 | hypothetical protein                                       | 3648708 | 1365 |
| ECs3656 | serine transporter                                         | 3650629 | 1290 |
| ECs3657 | L-serine dehydratase                                       | 3651976 | 1368 |
| ECs3658 | exonuclease IX                                             | 3653455 | 756  |
| ECs3659 | L-1,2-propanediol oxidoreductase                           | 3654265 | 1152 |
| ECs3660 | L-fucose phosphate aldolase                                | 3655441 | 648  |
| ECs3662 | L-fucose isomerase                                         | 3657984 | 1776 |
| ECs3663 | L-fuculokinase                                             | 3659838 | 1449 |
| ECs3667 | hypothetical protein                                       | 3663636 | 396  |
| ECs3668 | GcvA family transcriptional regulator                      | 3664050 | 918  |
| ECs3669 | hypothetical protein                                       | 3665318 | 231  |
| ECs3670 | cysteine sulfinate desulfinase                             | 3665737 | 1206 |
| ECs3671 | hypothetical protein                                       | 3666942 | 444  |

|         |                                                                                   |         |      |
|---------|-----------------------------------------------------------------------------------|---------|------|
| ECs3672 | hypothetical protein                                                              | 3667436 | 807  |
| ECs3673 | murein transglycosylase A                                                         | 3668481 | 1098 |
| ECs3674 | amidase                                                                           | 3670157 | 1254 |
| ECs3675 | N-acetylglutamate synthase                                                        | 3671642 | 1332 |
| ECs3676 | exonuclease V subunit alpha                                                       | 3673035 | 1827 |
| ECs3678 | protease III                                                                      | 3678396 | 2889 |
| ECs3679 | exonuclease V subunit gamma                                                       | 3681460 | 3369 |
| ECs3680 | hypothetical protein                                                              | 3684841 | 324  |
| ECs3681 | hypothetical protein                                                              | 3685149 | 408  |
| ECs3682 | hypothetical protein                                                              | 3685553 | 564  |
| ECs3684 | thymidylate synthase                                                              | 3686761 | 795  |
| ECs3685 | prolipoprotein diacylglycerol transferase                                         | 3687562 | 876  |
| ECs3686 | fused phosphoenolpyruvate-protein phosphotransferase PtsP/GAF domain              | 3688588 | 2247 |
| ECs3687 | dinucleoside polyphosphate hydrolase                                              | 3690847 | 531  |
| ECs3688 | DNA mismatch repair protein                                                       | 3692062 | 690  |
| ECs3689 | transporter                                                                       | 3692820 | 714  |
| ECs3690 | hypothetical protein                                                              | 3693671 | 219  |
| ECs3691 | aldo/keto reductase                                                               | 3693997 | 1041 |
| ECs3692 | lysophospholipid transporter LpIT                                                 | 3695069 | 1194 |
| ECs3693 | bifunctional acyl-ACP synthetase/2-acylglycerophosphoethanolamine acyltransferase | 3696255 | 2160 |
| ECs3694 | DNA-binding transcriptional regulator GalR                                        | 3699000 | 1032 |
| ECs3695 | diaminopimelate decarboxylase                                                     | 3700038 | 1263 |
| ECs3696 | LysR family transcriptional regulator                                             | 3701422 | 936  |
| ECs3697 | racemase                                                                          | 3702344 | 693  |
| ECs3698 | low-affinity L-arabinose transport system proton symport protein                  | 3703165 | 1419 |
| ECs3699 | 2-deoxy-D-gluconate 3-dehydrogenase                                               | 3704898 | 762  |
| ECs3700 | 5-keto-4-deoxyuronate isomerase                                                   | 3705689 | 837  |
| ECs3701 | acetyl-CoA acetyltransferase                                                      | 3706812 | 1182 |
| ECs3738 | lipoprotein                                                                       | 3737466 | 756  |
| ECs3739 | xanthine dehydrogenase subunit XdhA                                               | 3738676 | 2259 |
| ECs3741 | xanthine dehydrogenase subunit XdhC                                               | 3741820 | 480  |
| ECs3742 | transcriptional regulator                                                         | 3742339 | 1779 |
| ECs3744 | diaminopropionate ammonia-lyase                                                   | 3745841 | 1197 |
| ECs3745 | peptidase                                                                         | 3747095 | 1212 |
| ECs3746 | phenylhydantoinase                                                                | 3748359 | 1386 |
| ECs3747 | carbamate kinase                                                                  | 3749792 | 933  |
| ECs3749 | hypothetical protein                                                              | 3752438 | 708  |
| ECs3750 | hypothetical protein                                                              | 3753311 | 579  |
| ECs3753 | selenate reductase subunit YgfM                                                   | 3758690 | 780  |
| ECs3755 | transporter                                                                       | 3762444 | 1458 |
| ECs3756 | guanine deaminase                                                                 | 3763916 | 1320 |
| ECs3758 | oxidoreductase Fe-S subunit                                                       | 3766674 | 396  |
| ECs3760 | permease                                                                          | 3769448 | 1518 |
| ECs3761 | isopentenyl-diphosphate delta-isomerase                                           | 3771215 | 549  |
| ECs3762 | lysyl-tRNA synthetase                                                             | 3771806 | 1518 |
| ECs3764 | ssDNA exonuclease RecJ                                                            | 3774522 | 1734 |
| ECs3765 | thiol:disulfide interchange protein DsbC                                          | 3776261 | 711  |
| ECs3766 | site-specific tyrosine recombinase XerD                                           | 3776996 | 897  |
| ECs3767 | flavodoxin FldB                                                                   | 3778004 | 522  |
| ECs3768 | hypothetical protein                                                              | 3778565 | 408  |
| ECs3769 | hypothetical protein                                                              | 3778953 | 267  |
| ECs3770 | global regulator                                                                  | 3779462 | 981  |
| ECs3771 | oxidoreductase                                                                    | 3780519 | 660  |
| ECs3772 | hypothetical protein                                                              | 3781342 | 312  |
| ECs3773 | 6-phospho-beta-glucosidase                                                        | 3781692 | 1440 |
| ECs3774 | glycine dehydrogenase                                                             | 3783297 | 2874 |
| ECs3775 | glycine cleavage system protein H                                                 | 3786288 | 390  |
| ECs3776 | glycine cleavage system aminomethyltransferase T                                  | 3786701 | 1095 |
| ECs3777 | hypothetical protein                                                              | 3788243 | 1203 |
| ECs3778 | 2-octaprenyl-6-methoxyphenyl hydroxylase                                          | 3789469 | 1179 |
| ECs3779 | proline aminopeptidase P II                                                       | 3790644 | 1326 |
| ECs3780 | hypothetical protein                                                              | 3791995 | 579  |
| ECs3781 | Z-ring-associated protein                                                         | 3792741 | 330  |
| ECs3782 | ligase                                                                            | 3793370 | 549  |
| ECs3784 | D-3-phosphoglycerate dehydrogenase                                                | 3794700 | 1233 |
| ECs3785 | ribose-5-phosphate isomerase A                                                    | 3796187 | 660  |
| ECs3786 | chromosome replication initiation inhibitor protein                               | 3797229 | 894  |
| ECs3793 | hypothetical protein                                                              | 3804816 | 741  |
| ECs3794 | arginine exporter protein                                                         | 3805649 | 636  |
| ECs3795 | mechanosensitive channel MscS                                                     | 3806423 | 861  |
| ECs3796 | fructose-bisphosphate aldolase                                                    | 3807641 | 1080 |
| ECs3797 | phosphoglycerate kinase                                                           | 3808935 | 1164 |
| ECs3798 | erythrose 4-phosphate dehydrogenase                                               | 3810148 | 1020 |
| ECs3805 | DNA-binding transcriptional regulator                                             | 3815297 | 510  |
| ECs3807 | oxidoreductase                                                                    | 3816790 | 1278 |
| ECs3809 | mannitol phosphotransferase subunit EIIA                                          | 3819498 | 444  |
| ECs3810 | transketolase                                                                     | 3820255 | 1992 |

|         |                                                                                                       |         |      |
|---------|-------------------------------------------------------------------------------------------------------|---------|------|
| ECs3811 | hypothetical protein                                                                                  | 3822524 | 759  |
| ECs3814 | arginine decarboxylase                                                                                | 3825421 | 1977 |
| ECs3815 | hypothetical protein                                                                                  | 3827406 | 147  |
| ECs3816 | hypothetical protein                                                                                  | 3827673 | 216  |
| ECs3818 | S-adenosylmethionine synthetase                                                                       | 3828192 | 1155 |
| ECs3820 | hypothetical protein                                                                                  | 3831254 | 498  |
| ECs3821 | DNA-specific endonuclease I                                                                           | 3831846 | 708  |
| ECs3823 | glutathione synthetase                                                                                | 3833377 | 948  |
| ECs3824 | hypothetical protein                                                                                  | 3834436 | 564  |
| ECs3825 | Holliday junction resolvase-like protein                                                              | 3834999 | 417  |
| ECs3826 | hypothetical protein                                                                                  | 3836604 | 705  |
| ECs3829 | hypothetical protein                                                                                  | 3837889 | 291  |
| ECs3830 | deoxyribonucleotide triphosphate pyrophosphatase                                                      | 3838187 | 594  |
| ECs3831 | coproporphyrinogen III oxidase                                                                        | 3838773 | 1137 |
| ECs3832 | hypothetical protein                                                                                  | 3840152 | 1008 |
| ECs3834 | hypothetical protein                                                                                  | 3842498 | 720  |
| ECs3835 | hypothetical protein                                                                                  | 3843401 | 327  |
| ECs3836 | tRNA (guanine-N(7)-)-methyltransferase                                                                | 3843727 | 720  |
| ECs3839 | murein transglycosylase C                                                                             | 3846024 | 1083 |
| ECs3840 | protein NupG                                                                                          | 3847308 | 1257 |
| ECs3841 | ornithine decarboxylase                                                                               | 3848614 | 2136 |
| ECs3842 | transporter                                                                                           | 3851147 | 708  |
| ECs3874 | glutathione S-transferase                                                                             | 3879081 | 867  |
| ECs3875 | hydrogenase 2 accessory protein HypG                                                                  | 3880070 | 249  |
| ECs3876 | hydrogenase nickel incorporation protein HybF                                                         | 3880331 | 342  |
| ECs3877 | hydrogenase 2-specific chaperone                                                                      | 3880665 | 489  |
| ECs3878 | hydrogenase 2 maturation endopeptidase                                                                | 3881146 | 495  |
| ECs3879 | hydrogenase 2 large subunit                                                                           | 3881640 | 1704 |
| ECs3880 | hydrogenase 2 b cytochrome subunit                                                                    | 3883340 | 1179 |
| ECs3881 | hydrogenase 2 protein HybA                                                                            | 3884508 | 987  |
| ECs3882 | hydrogenase 2 small subunit                                                                           | 3885497 | 1119 |
| ECs3883 | hypothetical protein                                                                                  | 3886804 | 288  |
| ECs3884 | hypothetical protein                                                                                  | 3887210 | 888  |
| ECs3886 | hypothetical protein                                                                                  | 3889334 | 495  |
| ECs3887 | oxidoreductase                                                                                        | 3890019 | 885  |
| ECs3889 | biopolymer transport protein ExbD                                                                     | 3891175 | 426  |
| ECs3890 | biopolymer transport protein ExbB                                                                     | 3891607 | 735  |
| ECs3891 | hypothetical protein                                                                                  | 3892334 | 156  |
| ECs3892 | cystathionine beta-lyase                                                                              | 3892593 | 1188 |
| ECs3895 | AraC family transcriptional regulator                                                                 | 3894619 | 957  |
| ECs3896 | 2,5-diketo-D-gluconate reductase A                                                                    | 3896980 | 828  |
| ECs3898 | hypothetical protein                                                                                  | 3898276 | 654  |
| ECs3899 | outer membrane lipoprotein                                                                            | 3898978 | 258  |
| ECs3900 | hypothetical protein                                                                                  | 3899278 | 2220 |
| ECs3903 | DNA topoisomerase IV subunit A                                                                        | 3904066 | 2259 |
| ECs3905 | hypothetical protein                                                                                  | 3908178 | 483  |
| ECs3906 | hypothetical protein                                                                                  | 3908713 | 393  |
| ECs3907 | DNA-binding transcriptional regulator QseB                                                            | 3909257 | 660  |
| ECs3910 | modulator of drug activity B                                                                          | 3911371 | 582  |
| ECs3911 | hypothetical protein                                                                                  | 3911983 | 315  |
| ECs3918 | DNA topoisomerase IV subunit B                                                                        | 3919598 | 1893 |
| ECs3919 | esterase                                                                                              | 3921519 | 582  |
| ECs3920 | cyclic 3',5'-adenosine monophosphate phosphodiesterase                                                | 3922100 | 828  |
| ECs3921 | hypothetical protein                                                                                  | 3922952 | 423  |
| ECs3922 | ADP-ribose pyrophosphatase                                                                            | 3923375 | 630  |
| ECs3923 | outer membrane channel protein                                                                        | 3924209 | 1482 |
| ECs3924 | hypothetical protein                                                                                  | 3925690 | 261  |
| ECs3925 | hypothetical protein                                                                                  | 3925838 | 672  |
| ECs3926 | synthetase/amidase                                                                                    | 3926515 | 1161 |
| ECs3927 | hypothetical protein                                                                                  | 3927713 | 816  |
| ECs3929 | 3,4-dihydroxy-2-butanone 4-phosphate synthase                                                         | 3929907 | 654  |
| ECs3931 | glycogen synthesis protein GlgS                                                                       | 3931268 | 201  |
| ECs3935 | bifunctional heptose 7-phosphate kinase/heptose 1-phosphate adenyltransferase                         | 3934848 | 1434 |
| ECs3936 | bifunctional glutamine-synthetase adenyltransferase/deadenyltransferase                               | 3936329 | 2841 |
| ECs3937 | hypothetical protein                                                                                  | 3939192 | 1302 |
| ECs3938 | signal transduction protein                                                                           | 3940735 | 621  |
| ECs3939 | multifunctional tRNA nucleotidyl transferase/2'3'-cyclic phosphodiesterase/2'nucleotidase/phosphatase | 3941419 | 1239 |
| ECs3940 | UDP pyrophosphate phosphatase                                                                         | 3942838 | 822  |
| ECs3941 | bifunctional dihydroneopterin aldolase/dihydroneopterin triphosphate 2'-epimerase                     | 3943750 | 372  |
| ECs3942 | glycerol-3-phosphate acyltransferase PlsY                                                             | 3944224 | 618  |
| ECs3943 | transcriptional activator TtdR                                                                        | 3944854 | 933  |
| ECs3944 | tartrate dehydratase subunit alpha                                                                    | 3945993 | 912  |
| ECs3945 | L(+)-tartrate dehydratase subunit beta                                                                | 3946901 | 606  |
| ECs3946 | hypothetical protein                                                                                  | 3947555 | 1464 |
| ECs3947 | DNA-binding/iron metalloprotein/AP endonuclease                                                       | 3949061 | 1014 |
| ECs3948 | 30S ribosomal protein S21                                                                             | 3950312 | 216  |
| ECs3949 | DNA primase                                                                                           | 3950638 | 1746 |

|         |                                                                   |         |      |
|---------|-------------------------------------------------------------------|---------|------|
| ECs3950 | RNA polymerase sigma factor RpoD                                  | 3952578 | 1842 |
| ECs3951 | G/U mismatch-specific DNA glycosylase                             | 3954498 | 507  |
| ECs3954 | aerotaxis sensor receptor                                         | 3957087 | 1521 |
| ECs3955 | putrescine--2-oxoglutarate aminotransferase                       | 3958998 | 1407 |
| ECs3956 | hypothetical protein                                              | 3960446 | 333  |
| ECs3957 | DNA-binding transcriptional repressor EbgR                        | 3960997 | 984  |
| ECs3958 | cryptic beta-D-galactosidase subunit alpha                        | 3962164 | 3093 |
| ECs3959 | cryptic beta-D-galactosidase subunit beta                         | 3965253 | 450  |
| ECs3961 | hypothetical protein                                              | 3967332 | 1071 |
| ECs3964 | hypothetical protein                                              | 3973359 | 417  |
| ECs3966 | hypothetical protein                                              | 3974370 | 1137 |
| ECs3969 | hypothetical protein                                              | 3976924 | 1005 |
| ECs3970 | transporter                                                       | 3978212 | 966  |
| ECs3971 | serine/threonine transporter SstT                                 | 3979576 | 1245 |
| ECs3974 | glucuronate isomerase                                             | 3982961 | 1413 |
| ECs3976 | DNA-binding transcriptional repressor ExuR                        | 3986284 | 777  |
| ECs3977 | hypothetical protein                                              | 3987405 | 663  |
| ECs3978 | hypothetical protein                                              | 3988071 | 384  |
| ECs3979 | hypothetical protein                                              | 3988601 | 369  |
| ECs3980 | hypothetical protein                                              | 3989007 | 306  |
| ECs3981 | hypothetical protein                                              | 3989315 | 405  |
| ECs3982 | hypothetical protein                                              | 3989709 | 300  |
| ECs3984 | transferase                                                       | 3990656 | 987  |
| ECs3985 | cytochrome                                                        | 3991934 | 366  |
| ECs3987 | LysR family transcriptional regulator                             | 3992947 | 897  |
| ECs3988 | hypothetical protein                                              | 3993948 | 702  |
| ECs3989 | hypothetical protein                                              | 3994666 | 171  |
| ECs3990 | hypothetical protein                                              | 3994970 | 1311 |
| ECs3991 | transport system permease                                         | 3996308 | 1332 |
| ECs3992 | L-serine deaminase                                                | 3997914 | 1365 |
| ECs3993 | hypothetical protein                                              | 3999350 | 390  |
| ECs3994 | formate acetyltransferase 3                                       | 3999753 | 2295 |
| ECs3995 | propionate/acetate kinase                                         | 4002081 | 1221 |
| ECs3996 | threonine/serine transporter TdcC                                 | 4003315 | 1332 |
| ECs3997 | threonine dehydratase                                             | 4004668 | 990  |
| ECs3998 | TdcA family transcriptional regulator                             | 4005756 | 939  |
| ECs4002 | glycerate kinase                                                  | 4009860 | 1146 |
| ECs4003 | tartronate semialdehyde reductase                                 | 4011102 | 891  |
| ECs4011 | PTS system N-acetylgalactosamine-specific transporter subunit IIB | 4019452 | 474  |
| ECs4016 | tagatose-6-phosphate aldose/ketose isomerase                      | 4023516 | 1155 |
| ECs4017 | tagatose-bisphosphate aldolase                                    | 4024683 | 861  |
| ECs4019 | PTS system N-acetylgalactosamine-specific transporter subunit IID | 4027018 | 792  |
| ECs4027 | hypothetical protein                                              | 4034973 | 861  |
| ECs4029 | hypothetical protein                                              | 4037892 | 396  |
| ECs4030 | DnaA initiator-associating protein DiaA                           | 4038307 | 591  |
| ECs4031 | hypothetical protein                                              | 4038907 | 576  |
| ECs4036 | GIY-YIG nuclease superfamily protein                              | 4042464 | 303  |
| ECs4037 | hypothetical protein                                              | 4042753 | 504  |
| ECs4038 | hypothetical protein                                              | 4043250 | 525  |
| ECs4039 | collagenase                                                       | 4043983 | 996  |
| ECs4040 | hypothetical protein                                              | 4044969 | 897  |
| ECs4041 | hypothetical protein                                              | 4045946 | 1008 |
| ECs4042 | tryptophan permease                                               | 4047070 | 1245 |
| ECs4043 | ATP-dependent RNA helicase DeaD                                   | 4048468 | 1890 |
| ECs4044 | Nlp family transcriptional regulator                              | 4050537 | 885  |
| ECs4045 | polynucleotide phosphorylase                                      | 4051530 | 2205 |
| ECs4046 | 30S ribosomal protein S15                                         | 4053912 | 270  |
| ECs4047 | tRNA pseudouridine synthase B                                     | 4054330 | 945  |
| ECs4048 | ribosome-binding factor A                                         | 4055274 | 402  |
| ECs4049 | translation initiation factor IF-2                                | 4055840 | 2673 |
| ECs4050 | transcription elongation factor NusA                              | 4058537 | 1488 |
| ECs4051 | hypothetical protein                                              | 4060052 | 453  |
| ECs4052 | argininosuccinate synthase                                        | 4061135 | 1344 |
| ECs4054 | preprotein translocase subunit SecG                               | 4064671 | 333  |
| ECs4055 | phosphoglucosamine mutase                                         | 4065231 | 1338 |
| ECs4056 | dihydropteroate synthase                                          | 4066561 | 849  |
| ECs4057 | ATP-dependent metalloprotease                                     | 4067499 | 1935 |
| ECs4058 | 23S rRNA methyltransferase                                        | 4069533 | 630  |
| ECs4059 | RNA-binding protein YhbY                                          | 4070288 | 294  |
| ECs4060 | transcription elongation factor GreA                              | 4070737 | 477  |
| ECs4061 | D-alanyl-D-alanine carboxypeptidase                               | 4071461 | 1434 |
| ECs4062 | GTPase ObgE                                                       | 4072934 | 1173 |
| ECs4063 | hypothetical protein                                              | 4074122 | 966  |
| ECs4064 | 50S ribosomal protein L27                                         | 4075214 | 258  |
| ECs4065 | 50S ribosomal protein L21                                         | 4075492 | 312  |
| ECs4066 | octaprenyl diphosphate synthase                                   | 4076062 | 972  |
| ECs4068 | UDP-N-acetylglucosamine 1-carboxyvinyltransferase                 | 4077588 | 1260 |

|         |                                                                                             |         |      |
|---------|---------------------------------------------------------------------------------------------|---------|------|
| ECs4069 | hypothetical protein                                                                        | 4078902 | 270  |
| ECs4070 | hypothetical protein                                                                        | 4079316 | 294  |
| ECs4071 | hypothetical protein                                                                        | 4079609 | 636  |
| ECs4073 | hypothetical protein                                                                        | 4080819 | 783  |
| ECs4074 | ABC transporter ATP-binding protein                                                         | 4081609 | 810  |
| ECs4075 | calcium/sodium:proton antiporter                                                            | 4082628 | 978  |
| ECs4076 | D-arabinose 5-phosphate isomerase                                                           | 4083619 | 987  |
| ECs4077 | 3-deoxy-D-manno-octulosonate 8-phosphate phosphatase                                        | 4084626 | 567  |
| ECs4078 | hypothetical protein                                                                        | 4085189 | 576  |
| ECs4079 | lipopolysaccharide transport periplasmic protein LptA                                       | 4085733 | 558  |
| ECs4080 | ABC transporter ATP-binding protein                                                         | 4086297 | 726  |
| ECs4081 | RNA polymerase factor sigma-54                                                              | 4087070 | 1434 |
| ECs4082 | sigma(54) modulation protein                                                                | 4088526 | 288  |
| ECs4083 | PTS system transporter subunit IIA-like nitrogen-regulatory protein PtsN                    | 4088931 | 492  |
| ECs4084 | hypothetical protein                                                                        | 4089468 | 855  |
| ECs4085 | phosphohistidinoprotein-hexose phosphotransferase component of N-regulated PTS system (Npr) | 4090319 | 273  |
| ECs4086 | hypothetical protein                                                                        | 4090805 | 633  |
| ECs4087 | monofunctional biosynthetic peptidoglycan transglycosylase                                  | 4091434 | 729  |
| ECs4089 | aerobic respiration control sensor protein ArcB                                             | 4093042 | 2337 |
| ECs4090 | hypothetical protein                                                                        | 4095474 | 930  |
| ECs4091 | glutamate synthase subunit alpha                                                            | 4096984 | 4554 |
| ECs4092 | glutamate synthase subunit beta                                                             | 4101550 | 1419 |
| ECs4094 | hypothetical protein                                                                        | 4104261 | 465  |
| ECs4095 | N-acetylmannosamine kinase                                                                  | 4104722 | 876  |
| ECs4096 | N-acetylmannosamine-6-phosphate 2-epimerase                                                 | 4105594 | 690  |
| ECs4097 | sialic acid transporter                                                                     | 4106331 | 1491 |
| ECs4098 | N-acetylneuraminase lyase                                                                   | 4107930 | 894  |
| ECs4099 | transcriptional regulator NanR                                                              | 4108945 | 783  |
| ECs4101 | ClpXP protease specificity-enhancing factor                                                 | 4111515 | 498  |
| ECs4102 | stringent starvation protein A                                                              | 4112018 | 639  |
| ECs4103 | 30S ribosomal protein S9                                                                    | 4113051 | 393  |
| ECs4104 | 50S ribosomal protein L13                                                                   | 4113459 | 429  |
| ECs4105 | hypothetical protein                                                                        | 4114106 | 1128 |
| ECs4106 | cytochrome d ubiquinol oxidase subunit III                                                  | 4115421 | 405  |
| ECs4107 | serine endoprotease                                                                         | 4115979 | 1368 |
| ECs4108 | serine endoprotease                                                                         | 4117436 | 1068 |
| ECs4109 | malate dehydrogenase                                                                        | 4118567 | 939  |
| ECs4110 | arginine repressor ArgR                                                                     | 4119940 | 471  |
| ECs4111 | hypothetical protein                                                                        | 4120724 | 315  |
| ECs4112 | hypothetical protein                                                                        | 4121094 | 273  |
| ECs4113 | p-hydroxybenzoic acid efflux subunit AaeB                                                   | 4121458 | 1968 |
| ECs4114 | p-hydroxybenzoic acid efflux subunit AaeA                                                   | 4123431 | 930  |
| ECs4115 | hypothetical protein                                                                        | 4124368 | 204  |
| ECs4116 | DNA-binding transcriptional regulator                                                       | 4124754 | 930  |
| ECs4117 | protease TldD                                                                               | 4125817 | 1446 |
| ECs4118 | hypothetical protein                                                                        | 4127418 | 3801 |
| ECs4119 | ribonuclease G                                                                              | 4131286 | 1470 |
| ECs4120 | Maf-like protein                                                                            | 4132745 | 594  |
| ECs4121 | rod shape-determining protein MreD                                                          | 4133347 | 489  |
| ECs4123 | rod shape-determining protein MreB                                                          | 4135004 | 1044 |
| ECs4125 | dehydrogenase                                                                               | 4138444 | 975  |
| ECs4127 | acetyl-CoA carboxylase biotin carboxyl carrier protein subunit                              | 4140396 | 471  |
| ECs4128 | acetyl-CoA carboxylase biotin carboxylase subunit                                           | 4140877 | 1350 |
| ECs4129 | hypothetical protein                                                                        | 4142335 | 243  |
| ECs4130 | sodium/pantothenate symporter                                                               | 4142567 | 1452 |
| ECs4131 | 50S ribosomal protein L11 methyltransferase                                                 | 4144030 | 882  |
| ECs4132 | tRNA-dihydrouridine synthase B                                                              | 4145240 | 966  |
| ECs4133 | DNA-binding protein Fis                                                                     | 4146231 | 297  |
| ECs4140 | hypothetical protein                                                                        | 4153394 | 222  |
| ECs4144 | ABC transporter ATP-binding protein                                                         | 4157441 | 759  |
| ECs4146 | hypothetical protein                                                                        | 4164778 | 258  |
| ECs4147 | shikimate 5-dehydrogenase                                                                   | 4165032 | 819  |
| ECs4148 | ribosome maturation factor                                                                  | 4165855 | 573  |
| ECs4149 | hypothetical protein                                                                        | 4166432 | 306  |
| ECs4150 | hypothetical protein                                                                        | 4167003 | 474  |
| ECs4152 | peptide deformylase                                                                         | 4168702 | 510  |
| ECs4153 | methionyl-tRNA formyltransferase                                                            | 4169226 | 948  |
| ECs4155 | potassium transporter peripheral membrane protein                                           | 4171530 | 1377 |
| ECs4156 | large-conductance mechanosensitive channel                                                  | 4173036 | 411  |
| ECs4159 | 50S ribosomal protein L17                                                                   | 4174628 | 384  |
| ECs4160 | DNA-directed RNA polymerase subunit alpha                                                   | 4175052 | 990  |
| ECs4161 | 30S ribosomal protein S4                                                                    | 4176067 | 621  |
| ECs4162 | 30S ribosomal protein S11                                                                   | 4176721 | 390  |
| ECs4163 | 30S ribosomal protein S13                                                                   | 4177127 | 357  |
| ECs4164 | 50S ribosomal protein L36                                                                   | 4177630 | 117  |
| ECs4165 | preprotein translocase subunit SecY                                                         | 4177778 | 1332 |
| ECs4166 | 50S ribosomal protein L15                                                                   | 4179117 | 435  |

|         |                                              |         |      |
|---------|----------------------------------------------|---------|------|
| ECs4167 | 50S ribosomal protein L30                    | 4179555 | 180  |
| ECs4168 | 30S ribosomal protein S5                     | 4179738 | 504  |
| ECs4169 | 50S ribosomal protein L18                    | 4180256 | 354  |
| ECs4170 | 50S ribosomal protein L6                     | 4180619 | 534  |
| ECs4171 | 30S ribosomal protein S8                     | 4181165 | 393  |
| ECs4172 | 30S ribosomal protein S14                    | 4181591 | 306  |
| ECs4173 | 50S ribosomal protein L5                     | 4181911 | 540  |
| ECs4174 | 50S ribosomal protein L24                    | 4182465 | 315  |
| ECs4175 | 50S ribosomal protein L14                    | 4182790 | 372  |
| ECs4176 | 30S ribosomal protein S17                    | 4183326 | 255  |
| ECs4177 | 50S ribosomal protein L29                    | 4183580 | 192  |
| ECs4178 | 50S ribosomal protein L16                    | 4183771 | 411  |
| ECs4179 | 30S ribosomal protein S3                     | 4184194 | 702  |
| ECs4180 | 50S ribosomal protein L22                    | 4184913 | 333  |
| ECs4181 | 30S ribosomal protein S19                    | 4185260 | 279  |
| ECs4182 | 50S ribosomal protein L2                     | 4185555 | 822  |
| ECs4183 | 50S ribosomal protein L23                    | 4186394 | 303  |
| ECs4184 | 50S ribosomal protein L4                     | 4186693 | 606  |
| ECs4185 | 50S ribosomal protein L3                     | 4187309 | 630  |
| ECs4186 | 30S ribosomal protein S10                    | 4187971 | 312  |
| ECs4191 | elongation factor G                          | 4191306 | 2115 |
| ECs4192 | 30S ribosomal protein S7                     | 4193517 | 471  |
| ECs4193 | 30S ribosomal protein S12                    | 4194084 | 375  |
| ECs4194 | sulfur transfer complex subunit TusB         | 4194584 | 288  |
| ECs4196 | sulfur transfer complex subunit TusD         | 4195238 | 387  |
| ECs4197 | hypothetical protein                         | 4195624 | 723  |
| ECs4198 | FKBP-type peptidylprolyl isomerase           | 4196513 | 813  |
| ECs4199 | hypothetical protein                         | 4197546 | 219  |
| ECs4200 | FKBP-type peptidylprolyl isomerase           | 4197813 | 591  |
| ECs4203 | ABC transporter ATP-binding protein          | 4201195 | 1914 |
| ECs4204 | hydrolase                                    | 4203108 | 1023 |
| ECs4205 | hypothetical protein                         | 4204124 | 219  |
| ECs4206 | phosphoribulokinase                          | 4204396 | 870  |
| ECs4207 | hypothetical protein                         | 4205320 | 405  |
| ECs4208 | cAMP-regulatory protein                      | 4206026 | 633  |
| ECs4209 | hypothetical protein                         | 4206709 | 2091 |
| ECs4211 | para-aminobenzoate synthase component II     | 4210172 | 564  |
| ECs4212 | cell filamentation protein Fic               | 4210767 | 603  |
| ECs4213 | hypothetical protein                         | 4211359 | 168  |
| ECs4215 | hypothetical protein                         | 4212474 | 1182 |
| ECs4216 | nitrite reductase (NAD(P)H) subunit          | 4213917 | 2544 |
| ECs4217 | nitrite reductase small subunit              | 4216457 | 327  |
| ECs4218 | nitrite transporter NirC                     | 4216909 | 807  |
| ECs4219 | siroheme synthase                            | 4217734 | 1374 |
| ECs4220 | hypothetical protein                         | 4219362 | 168  |
| ECs4226 | tryptophanyl-tRNA synthetase                 | 4224830 | 1005 |
| ECs4228 | ribulose-phosphate 3-epimerase               | 4226578 | 678  |
| ECs4229 | DNA adenine methylase                        | 4227273 | 837  |
| ECs4230 | hypothetical protein                         | 4228216 | 1287 |
| ECs4231 | 3-dehydroquinate synthase                    | 4229594 | 1089 |
| ECs4232 | shikimate kinase I                           | 4230739 | 522  |
| ECs4233 | outer membrane porin HofQ                    | 4231661 | 1239 |
| ECs4236 | hypothetical protein                         | 4233629 | 540  |
| ECs4238 | peptidoglycan synthetase                     | 4235066 | 2553 |
| ECs4239 | ADP-ribose diphosphatase NudE                | 4237783 | 561  |
| ECs4241 | phosphatase                                  | 4240863 | 669  |
| ECs4242 | ribosome-associated heat shock protein Hsp15 | 4241542 | 402  |
| ECs4243 | Hsp33-like chaperonin                        | 4241968 | 879  |
| ECs4244 | transport                                    | 4242909 | 1725 |
| ECs4246 | osmolarity sensor protein                    | 4246710 | 1353 |
| ECs4247 | osmolarity response regulator                | 4248059 | 720  |
| ECs4248 | transcription elongation factor GreB         | 4249006 | 477  |
| ECs4249 | hypothetical protein                         | 4249678 | 2223 |
| ECs4252 | hypothetical protein                         | 4254903 | 237  |
| ECs4255 | carboxylesterase BioH                        | 4256247 | 771  |
| ECs4256 | DNA uptake protein                           | 4257797 | 576  |
| ECs4257 | gluconate permease                           | 4258733 | 1317 |
| ECs4259 | maltodextrin phosphorylase                   | 4262188 | 2394 |
| ECs4260 | transcriptional regulator MalT               | 4265193 | 2706 |
| ECs4266 | DNA-binding transcriptional repressor GlpR   | 4272795 | 759  |
| ECs4267 | intramembrane serine protease GlpG           | 4273570 | 831  |
| ECs4268 | thiosulfate sulfurtransferase                | 4274445 | 327  |
| ECs4269 | glycerol-3-phosphate dehydrogenase           | 4274961 | 1506 |
| ECs4274 | glycogen synthase                            | 4282400 | 1434 |
| ECs4275 | glucose-1-phosphate adenylyltransferase      | 4283833 | 1296 |
| ECs4276 | glycogen debranching protein                 | 4285146 | 1974 |
| ECs4277 | glycogen branching protein                   | 4287116 | 2187 |



|         |                                                                                |         |      |
|---------|--------------------------------------------------------------------------------|---------|------|
| ECs4278 | aspartate-semialdehyde dehydrogenase                                           | 4289575 | 1104 |
| ECs4279 | dITP- and XTP- hydrolase                                                       | 4290870 | 594  |
| ECs4285 | low affinity gluconate transporter                                             | 4294975 | 1341 |
| ECs4286 | gluconate kinase                                                               | 4296319 | 528  |
| ECs4287 | regulator of gluconate operon                                                  | 4296985 | 996  |
| ECs4288 | hypothetical protein                                                           | 4298204 | 696  |
| ECs4289 | dehydrogenase                                                                  | 4299022 | 1038 |
| ECs4295 | glycerophosphodiester phosphodiesterase                                        | 4305029 | 744  |
| ECs4296 | glycerol-3-phosphate transporter ATP-binding protein                           | 4305769 | 1071 |
| ECs4297 | glycerol-3-phosphate transporter membrane protein                              | 4306841 | 846  |
| ECs4299 | glycerol-3-phosphate transporter periplasmic binding protein                   | 4308668 | 1317 |
| ECs4301 | leucine/isoleucine/valine transporter ATP-binding protein                      | 4311209 | 714  |
| ECs4302 | leucine/isoleucine/valine transporter ATP-binding protein                      | 4311924 | 768  |
| ECs4303 | leucine/isoleucine/valine transporter permease                                 | 4312688 | 1278 |
| ECs4304 | branched-chain amino acid transporter permease LivH                            | 4313962 | 927  |
| ECs4305 | periplasmic binding protein of high-affinity leucine-specific transport system | 4314936 | 1110 |
| ECs4306 | hypothetical protein                                                           | 4316469 | 384  |
| ECs4309 | periplasmic binding protein of high-affinity amino acid transport system       | 4317799 | 1161 |
| ECs4310 | RNA polymerase factor sigma-32                                                 | 4319173 | 855  |
| ECs4311 | cell division protein FtsX                                                     | 4320272 | 1059 |
| ECs4312 | cell division protein FtsE                                                     | 4321323 | 669  |
| ECs4316 | receptor                                                                       | 4324498 | 360  |
| ECs4317 | hypothetical protein                                                           | 4324998 | 627  |
| ECs4318 | zinc/cadmium/mercury/lead-transporting ATPase                                  | 4325698 | 2199 |
| ECs4319 | sulfur transfer protein SirA                                                   | 4327998 | 246  |
| ECs4320 | hypothetical protein                                                           | 4328464 | 666  |
| ECs4321 | hypothetical protein                                                           | 4329202 | 558  |
| ECs4323 | hypothetical protein                                                           | 4331112 | 1050 |
| ECs4342 | holo-ACP synthase                                                              | 4347574 | 588  |
| ECs4343 | periplasmic binding protein for nickel                                         | 4348272 | 1575 |
| ECs4344 | nickel transporter permease NikB                                               | 4349846 | 945  |
| ECs4345 | nickel transporter permease NikC                                               | 4350787 | 834  |
| ECs4346 | nickel transporter ATP-binding protein NikD                                    | 4351620 | 765  |
| ECs4347 | nickel transporter ATP-binding protein NikE                                    | 4352381 | 807  |
| ECs4348 | nickel responsive regulator                                                    | 4353193 | 402  |
| ECs4358 | transporter                                                                    | 4360156 | 1125 |
| ECs4359 | ABC transporter ATP-binding protein                                            | 4361280 | 2685 |
| ECs4365 | low-affinity phosphate transport protein                                       | 4372127 | 1500 |
| ECs4366 | universal stress protein UspB                                                  | 4373697 | 336  |
| ECs4367 | hypothetical protein                                                           | 4374423 | 435  |
| ECs4368 | inner membrane transporter YhiP                                                | 4375174 | 1470 |
| ECs4369 | methyltransferase                                                              | 4376692 | 753  |
| ECs4371 | hypothetical protein                                                           | 4379697 | 843  |
| ECs4372 | glutathione reductase                                                          | 4380611 | 1353 |
| ECs4375 | arsenate reductase                                                             | 4384553 | 426  |
| ECs4377 | hypothetical protein                                                           | 4387074 | 567  |
| ECs4378 | hypothetical protein                                                           | 4387796 | 531  |
| ECs4389 | acid-resistance protein                                                        | 4398101 | 339  |
| ECs4390 | acid-resistance protein                                                        | 4398543 | 333  |
| ECs4391 | acid-resistance membrane protein                                               | 4399130 | 573  |
| ECs4393 | multidrug efflux system protein MdtE                                           | 4401367 | 1158 |
| ECs4394 | transport system permease                                                      | 4402549 | 3114 |
| ECs4395 | AraC family transcriptional regulator                                          | 4406025 | 729  |
| ECs4399 | trehalase                                                                      | 4411729 | 1650 |
| ECs4400 | regulator                                                                      | 4413429 | 603  |
| ECs4401 | LysR family transcriptional regulator                                          | 4414479 | 972  |
| ECs4402 | hypothetical protein                                                           | 4415499 | 1014 |
| ECs4403 | transporter                                                                    | 4416924 | 1323 |
| ECs4404 | hypothetical protein                                                           | 4418428 | 2076 |
| ECs4405 | EAL domain-containing protein                                                  | 4420558 | 771  |
| ECs4408 | C4-dicarboxylate transporter DctA                                              | 4424299 | 1287 |
| ECs4410 | oxidoreductase subunit                                                         | 4427838 | 3009 |
| ECs4411 | endo-1,4-D-glucanase                                                           | 4431283 | 1107 |
| ECs4414 | hypothetical protein                                                           | 4437379 | 537  |
| ECs4415 | hypothetical protein                                                           | 4438143 | 189  |
| ECs4416 | protease                                                                       | 4438604 | 1572 |
| ECs4417 | hypothetical protein                                                           | 4440175 | 189  |
| ECs4418 | hypothetical protein                                                           | 4440360 | 1680 |
| ECs4419 | transporter protein                                                            | 4442709 | 1272 |
| ECs4421 | peptide ABC transporter ATP-binding protein                                    | 4445011 | 984  |
| ECs4422 | peptide ABC transporter                                                        | 4446005 | 903  |
| ECs4423 | peptide ABC transporter permease                                               | 4446917 | 1020 |
| ECs4424 | peptide ABC transporter                                                        | 4448087 | 1608 |
| ECs4425 | phosphoethanolamine transferase                                                | 4450607 | 1692 |
| ECs4434 | 3-methyladenine DNA glycosylase                                                | 4460666 | 564  |
| ECs4437 | outer membrane lipoprotein                                                     | 4464121 | 660  |
| ECs4438 | 2-hydroxyacid dehydrogenase                                                    | 4464884 | 975  |

|         |                                                                                                |         |      |
|---------|------------------------------------------------------------------------------------------------|---------|------|
| ECs4440 | transcriptional regulator                                                                      | 4467052 | 291  |
| ECs4441 | major cold shock protein                                                                       | 4467623 | 213  |
| ECs4442 | glycyl-tRNA synthetase subunit beta                                                            | 4468498 | 2070 |
| ECs4443 | glycyl-tRNA synthetase subunit alpha                                                           | 4470577 | 912  |
| ECs4444 | hypothetical protein                                                                           | 4472057 | 996  |
| ECs4445 | hypothetical protein                                                                           | 4473094 | 438  |
| ECs4446 | hypothetical protein                                                                           | 4473577 | 354  |
| ECs4448 | xylose isomerase                                                                               | 4475613 | 1323 |
| ECs4449 | D-xylose transporter subunit XylF                                                              | 4477301 | 993  |
| ECs4450 | xylose transporter ATP-binding protein                                                         | 4478371 | 1542 |
| ECs4451 | membrane component of xylose transport system                                                  | 4479890 | 1182 |
| ECs4453 | hypothetical protein                                                                           | 4482435 | 825  |
| ECs4454 | periplasmic alpha-amylase                                                                      | 4483579 | 2031 |
| ECs4455 | valine--pyruvate transaminase                                                                  | 4485787 | 1254 |
| ECs4456 | hypothetical protein                                                                           | 4487192 | 474  |
| ECs4464 | aldehyde dehydrogenase                                                                         | 4496306 | 1539 |
| ECs4466 | alcohol dehydrogenase                                                                          | 4499377 | 1152 |
| ECs4468 | selenocysteine synthase                                                                        | 4502558 | 1392 |
| ECs4469 | glutathione S-transferase                                                                      | 4504047 | 609  |
| ECs4474 | hypothetical protein                                                                           | 4512329 | 363  |
| ECs4475 | mannitol-specific PTS system enzyme IIABC components                                           | 4513228 | 1914 |
| ECs4476 | mannitol-1-phosphate 5-dehydrogenase                                                           | 4515236 | 1149 |
| ECs4477 | mannitol repressor protein                                                                     | 4516384 | 588  |
| ECs4481 | L-lactate permease                                                                             | 4524243 | 1656 |
| ECs4482 | DNA-binding transcriptional repressor LldR                                                     | 4525898 | 777  |
| ECs4483 | L-lactate dehydrogenase                                                                        | 4526671 | 1191 |
| ECs4484 | tRNA/rRNA methyltransferase YibK                                                               | 4528047 | 474  |
| ECs4485 | serine acetyltransferase                                                                       | 4528573 | 822  |
| ECs4486 | NAD(P)H-dependent glycerol-3-phosphate dehydrogenase                                           | 4529474 | 1020 |
| ECs4487 | preprotein translocase subunit SecB                                                            | 4530493 | 468  |
| ECs4488 | glutaredoxin 3                                                                                 | 4531023 | 252  |
| ECs4489 | hypothetical protein                                                                           | 4531416 | 432  |
| ECs4490 | phosphoglyceromutase                                                                           | 4532092 | 1545 |
| ECs4491 | hypothetical protein                                                                           | 4533646 | 1284 |
| ECs4492 | hypothetical protein                                                                           | 4534933 | 960  |
| ECs4495 | 2-amino-3-ketobutyrate CoA ligase                                                              | 4538188 | 1197 |
| ECs4497 | ADP-L-glycero-D-manno-heptose-6-epimerase                                                      | 4540820 | 933  |
| ECs4508 | 3-deoxy-D-manno-octulosonic-acid transferase                                                   | 4552399 | 1278 |
| ECs4509 | phosphopantetheine adenylyltransferase                                                         | 4553684 | 480  |
| ECs4510 | formamidopyrimidine-DNA glycosylase                                                            | 4554202 | 810  |
| ECs4511 | 50S ribosomal protein L33                                                                      | 4555109 | 168  |
| ECs4512 | 50S ribosomal protein L28                                                                      | 4555297 | 237  |
| ECs4513 | DNA repair protein RadC                                                                        | 4555750 | 675  |
| ECs4514 | bifunctional phosphopantothienoylcysteine decarboxylase/phosphopantothenate synthase           | 4556590 | 1221 |
| ECs4515 | deoxyuridine 5'-triphosphate nucleotidohydrolase                                               | 4557791 | 456  |
| ECs4516 | nucleoid occlusion protein                                                                     | 4558353 | 597  |
| ECs4517 | orotate phosphoribosyltransferase                                                              | 4558986 | 642  |
| ECs4519 | hypothetical protein                                                                           | 4560536 | 864  |
| ECs4521 | hypothetical protein                                                                           | 4562736 | 618  |
| ECs4523 | guanylate kinase                                                                               | 4565290 | 624  |
| ECs4524 | DNA-directed RNA polymerase subunit omega                                                      | 4565968 | 276  |
| ECs4525 | bifunctional (p)ppGpp synthetase II/ guanosine-3',5'-bis pyrophosphate 3'-pyrophosphohydrolase | 4566262 | 2109 |
| ECs4526 | tRNA guanosine-2'-O-methyltransferase                                                          | 4568377 | 690  |
| ECs4527 | ATP-dependent DNA helicase RecG                                                                | 4569072 | 2082 |
| ECs4529 | glutamate transport protein                                                                    | 4572007 | 1206 |
| ECs4530 | transporter                                                                                    | 4573492 | 1392 |
| ECs4531 | hypothetical protein                                                                           | 4575004 | 1710 |
| ECs4533 | transporter                                                                                    | 4579094 | 1383 |
| ECs4599 | hypothetical protein                                                                           | 4629083 | 480  |
| ECs4600 | hypothetical protein                                                                           | 4629588 | 426  |
| ECs4603 | sugar phosphate antiporter                                                                     | 4632908 | 1392 |
| ECs4605 | sensory histidine kinase UhpB                                                                  | 4635766 | 1503 |
| ECs4606 | UhpA family transcriptional regulator                                                          | 4637268 | 591  |
| ECs4611 | acetolactate synthase 1 regulatory subunit                                                     | 4641277 | 291  |
| ECs4612 | acetolactate synthase catalytic subunit                                                        | 4641571 | 1689 |
| ECs4613 | ilvB operon leader peptide                                                                     | 4643365 | 99   |
| ECs4614 | multidrug resistance protein D                                                                 | 4644391 | 1191 |
| ECs4615 | transcriptional regulator                                                                      | 4645589 | 498  |
| ECs4616 | hypothetical protein                                                                           | 4646083 | 363  |
| ECs4617 | hypothetical protein                                                                           | 4646435 | 348  |
| ECs4625 | hypothetical protein                                                                           | 4655596 | 1662 |
| ECs4626 | heat shock chaperone IbpB                                                                      | 4657453 | 429  |
| ECs4627 | heat shock protein IbpA                                                                        | 4657993 | 414  |
| ECs4628 | hypothetical protein                                                                           | 4658712 | 333  |
| ECs4629 | hypothetical protein                                                                           | 4659046 | 1251 |
| ECs4630 | oxidoreductase                                                                                 | 4660361 | 1065 |
| ECs4632 | sugar phosphatase                                                                              | 4662373 | 813  |

|         |                                                                                                            |         |      |
|---------|------------------------------------------------------------------------------------------------------------|---------|------|
| ECs4634 | DNA gyrase subunit B                                                                                       | 4663938 | 2415 |
| ECs4635 | recombination protein F                                                                                    | 4666381 | 1074 |
| ECs4636 | DNA polymerase III subunit beta                                                                            | 4667454 | 1101 |
| ECs4637 | chromosomal replication initiation protein                                                                 | 4668559 | 1404 |
| ECs4638 | 50S ribosomal protein L34                                                                                  | 4670569 | 141  |
| ECs4639 | ribonuclease P                                                                                             | 4670726 | 360  |
| ECs4640 | inner membrane protein translocase component YidC                                                          | 4671309 | 1647 |
| ECs4641 | tRNA modification GTPase TrmE                                                                              | 4673061 | 1365 |
| ECs4644 | tryptophanase leader peptide                                                                               | 4677144 | 75   |
| ECs4645 | tryptophanase                                                                                              | 4677439 | 1416 |
| ECs4647 | multidrug efflux system protein MdtL                                                                       | 4680324 | 1176 |
| ECs4648 | DNA-binding transcriptional regulator YidZ                                                                 | 4681474 | 960  |
| ECs4649 | hypothetical protein                                                                                       | 4682578 | 762  |
| ECs4650 | hypothetical protein                                                                                       | 4683361 | 567  |
| ECs4651 | membrane/transport protein                                                                                 | 4683981 | 1338 |
| ECs4660 | transcriptional regulator PhoU                                                                             | 4693561 | 726  |
| ECs4661 | phosphate transporter ATP-binding protein                                                                  | 4694301 | 774  |
| ECs4662 | phosphate transporter permease PtsA                                                                        | 4695257 | 891  |
| ECs4663 | phosphate transporter permease PstC                                                                        | 4696147 | 960  |
| ECs4664 | phosphate ABC transporter substrate-binding protein                                                        | 4697193 | 1041 |
| ECs4671 | glucosamine--fructose-6-phosphate aminotransferase                                                         | 4705284 | 1830 |
| ECs4672 | bifunctional N-acetylglucosamine-1-phosphate uridylyltransferase/glucosamine-1-phosphate acetyltransferase | 4707275 | 1371 |
| ECs4673 | ATP synthase F0F1 subunit epsilon                                                                          | 4708997 | 420  |
| ECs4674 | ATP synthase F0F1 subunit beta                                                                             | 4709437 | 1383 |
| ECs4676 | ATP synthase F0F1 subunit alpha                                                                            | 4711760 | 1542 |
| ECs4677 | ATP synthase F0F1 subunit delta                                                                            | 4713314 | 534  |
| ECs4678 | ATP synthase F0F1 subunit B                                                                                | 4713862 | 471  |
| ECs4679 | ATP synthase F0F1 subunit C                                                                                | 4714394 | 240  |
| ECs4680 | ATP synthase F0F1 subunit A                                                                                | 4714680 | 816  |
| ECs4681 | F0F1 ATP synthase subunit I                                                                                | 4715504 | 381  |
| ECs4683 | tRNA uridine 5-carboxymethylaminomethyl modification protein GidA                                          | 4717188 | 1890 |
| ECs4684 | flavodoxin                                                                                                 | 4719456 | 444  |
| ECs4685 | AsnC family transcriptional regulator                                                                      | 4719989 | 459  |
| ECs4686 | asparagine synthetase AsnA                                                                                 | 4720599 | 993  |
| ECs4687 | hypothetical protein                                                                                       | 4721596 | 1452 |
| ECs4688 | regulatory ATPase RavA                                                                                     | 4723041 | 1497 |
| ECs4689 | potassium transport protein Kup                                                                            | 4724760 | 1869 |
| ECs4690 | D-ribose pyranase                                                                                          | 4726795 | 420  |
| ECs4691 | sugar ABC transporter ATP-binding protein                                                                  | 4727222 | 1506 |
| ECs4692 | ribose ABC transporter permease                                                                            | 4728732 | 966  |
| ECs4693 | D-ribose transporter subunit RbsB                                                                          | 4729722 | 891  |
| ECs4694 | ribokinase                                                                                                 | 4730738 | 930  |
| ECs4696 | transporter                                                                                                | 4732629 | 1428 |
| ECs4697 | hypothetical protein                                                                                       | 4734079 | 693  |
| ECs4698 | transcriptional regulator HdfR                                                                             | 4740572 | 840  |
| ECs4699 | hypothetical protein                                                                                       | 4741530 | 339  |
| ECs4700 | ATP-dependent protease                                                                                     | 4741893 | 1551 |
| ECs4701 | ilvG operon leader peptide                                                                                 | 4743766 | 99   |
| ECs4703 | acetolactate synthase 2 regulatory subunit                                                                 | 4745647 | 264  |
| ECs4704 | branched-chain amino acid aminotransferase                                                                 | 4745930 | 930  |
| ECs4705 | dihydroxy-acid dehydratase                                                                                 | 4746924 | 1851 |
| ECs4706 | threonine dehydratase                                                                                      | 4748777 | 1545 |
| ECs4707 | DNA-binding transcriptional regulator IlvY                                                                 | 4750373 | 894  |
| ECs4708 | ketol-acid reductoisomerase                                                                                | 4751416 | 1476 |
| ECs4709 | peptidyl-prolyl cis-trans isomerase C                                                                      | 4752937 | 282  |
| ECs4711 | ATP-dependent DNA helicase Rep                                                                             | 4754083 | 2022 |
| ECs4712 | guanosine pentaphosphate phosphohydrolase                                                                  | 4756151 | 1485 |
| ECs4713 | ATP-dependent RNA helicase RhlB                                                                            | 4757771 | 1266 |
| ECs4714 | thioredoxin                                                                                                | 4759113 | 384  |
| ECs4715 | rho operon leader peptide                                                                                  | 4759637 | 102  |
| ECs4716 | transcription termination factor Rho                                                                       | 4759823 | 1260 |
| ECs4717 | UDP-GlcNAc:undecaprenylphosphate GlcNAc-1-phosphate transferase                                            | 4761322 | 1104 |
| ECs4718 | lipopolysaccharide biosynthesis protein WzzE                                                               | 4762434 | 1050 |
| ECs4720 | UDP-N-acetyl-D-mannosamine dehydrogenase                                                                   | 4764666 | 1263 |
| ECs4721 | dTDP-glucose 4,6-dehydratase                                                                               | 4765928 | 1068 |
| ECs4722 | glucose-1-phosphate thymidyltransferase                                                                    | 4767014 | 882  |
| ECs4723 | TDP-fucosamine acetyltransferase                                                                           | 4768002 | 546  |
| ECs4724 | TDP-4-oxo-6-deoxy-D-glucose transaminase                                                                   | 4768552 | 1131 |
| ECs4727 | common antigen polymerase                                                                                  | 4772007 | 1353 |
| ECs4728 | UDP-N-acetyl-D-mannosaminuronic acid transferase                                                           | 4773362 | 741  |
| ECs4729 | transporter                                                                                                | 4774293 | 1386 |
| ECs4730 | arylsulfatase                                                                                              | 4776589 | 1236 |
| ECs4732 | protoheme IX biogenesis protein                                                                            | 4780326 | 1197 |
| ECs4734 | uroporphyrinogen-III synthase                                                                              | 4782746 | 741  |
| ECs4735 | porphobilinogen deaminase                                                                                  | 4783483 | 963  |
| ECs4740 | hypothetical protein                                                                                       | 4789241 | 708  |
| ECs4741 | site-specific tyrosine recombinase XerC                                                                    | 4789945 | 897  |

|         |                                                                               |         |      |
|---------|-------------------------------------------------------------------------------|---------|------|
| ECs4742 | flavin mononucleotide phosphatase                                             | 4790841 | 717  |
| ECs4743 | DNA-dependent helicase II                                                     | 4791641 | 2163 |
| ECs4750 | hypothetical protein                                                          | 4800540 | 468  |
| ECs4751 | phospholipase A                                                               | 4801172 | 870  |
| ECs4752 | ATP-dependent DNA helicase RecQ                                               | 4802168 | 1836 |
| ECs4754 | homoserine/homoserine lactone efflux protein                                  | 4804749 | 621  |
| ECs4755 | lysophospholipase L2                                                          | 4805480 | 1023 |
| ECs4756 | sugar phosphatase                                                             | 4806510 | 801  |
| ECs4757 | hypothetical protein                                                          | 4807386 | 900  |
| ECs4758 | regulator for metE and metH                                                   | 4808173 | 954  |
| ECs4759 | 5- methyltetrahydropteroyltrimethylglutamate/homocysteine S-methyltransferase | 4809362 | 2262 |
| ECs4761 | uridine phosphorylase                                                         | 4812740 | 762  |
| ECs4762 | DNA recombination protein RmuC                                                | 4813642 | 1428 |
| ECs4763 | ubiquinone/menaquinone biosynthesis methyltransferase                         | 4815164 | 756  |
| ECs4764 | hypothetical protein                                                          | 4815933 | 606  |
| ECs4765 | ubiquinone biosynthesis protein UbiB                                          | 4816535 | 1641 |
| ECs4766 | twin arginine translocase A                                                   | 4818254 | 270  |
| ECs4767 | sec-independent translocase                                                   | 4818527 | 516  |
| ECs4768 | twin-arginine protein translocation system subunit TatC                       | 4819045 | 777  |
| ECs4769 | DNase TatD                                                                    | 4819863 | 783  |
| ECs4770 | transcriptional activator RfaH                                                | 4820642 | 489  |
| ECs4771 | 3-octaprenyl-4-hydroxybenzoate carboxy-lyase                                  | 4821297 | 1494 |
| ECs4772 | FMN reductase                                                                 | 4822836 | 702  |
| ECs4773 | 3-ketoacyl-CoA thiolase                                                       | 4823729 | 1164 |
| ECs4774 | multifunctional fatty acid oxidation complex subunit alpha                    | 4824902 | 2190 |
| ECs4775 | proline dipeptidase                                                           | 4827281 | 1332 |
| ECs4776 | hypothetical protein                                                          | 4828612 | 615  |
| ECs4777 | potassium transporter                                                         | 4829265 | 1452 |
| ECs4778 | protoporphyrinogen oxidase                                                    | 4830728 | 546  |
| ECs4779 | molybdopterin-guanine dinucleotide biosynthesis protein B                     | 4836858 | 513  |
| ECs4780 | molybdopterin-guanine dinucleotide biosynthesis protein MobA                  | 4837367 | 585  |
| ECs4781 | hypothetical protein                                                          | 4838021 | 270  |
| ECs4782 | serine/threonine protein kinase                                               | 4838367 | 987  |
| ECs4783 | protein disulfide isomerase I                                                 | 4839370 | 627  |
| ECs4787 | ribosome biogenesis GTP-binding protein YsxC                                  | 4846086 | 633  |
| ECs4788 | hypothetical protein                                                          | 4847300 | 507  |
| ECs4789 | coproporphyrinogen III oxidase                                                | 4847995 | 1374 |
| ECs4790 | nitrogen regulation protein NR(I)                                             | 4849780 | 1410 |
| ECs4791 | nitrogen regulation protein NR(II)                                            | 4851201 | 1050 |
| ECs4792 | glutamine synthetase                                                          | 4852424 | 1410 |
| ECs4793 | GTP-binding protein                                                           | 4854206 | 1824 |
| ECs4808 | phosphatase                                                                   | 4872124 | 600  |
| ECs4809 | ribonuclease BN                                                               | 4872717 | 873  |
| ECs4810 | D-tyrosyl-tRNA(Tyr) deacylase                                                 | 4873586 | 438  |
| ECs4811 | acetyltransferase                                                             | 4874020 | 990  |
| ECs4817 | formate dehydrogenase accessory protein FdhE                                  | 4878935 | 930  |
| ECs4818 | formate dehydrogenase-O subunit gamma                                         | 4879861 | 636  |
| ECs4819 | formate dehydrogenase-O iron-sulfur subunit                                   | 4880493 | 903  |
| ECs4821 | formate dehydrogenase accessory protein                                       | 4884652 | 834  |
| ECs4828 | hypothetical protein                                                          | 4893360 | 315  |
| ECs4830 | L-rhamnose isomerase                                                          | 4894683 | 1260 |
| ECs4831 | rhamnulokinase                                                                | 4895939 | 1470 |
| ECs4834 | superoxide dismutase                                                          | 4900764 | 627  |
| ECs4836 | hypothetical protein                                                          | 4902782 | 675  |
| ECs4837 | two-component sensor protein                                                  | 4903562 | 1374 |
| ECs4838 | CpxR family transcriptional regulator                                         | 4904932 | 699  |
| ECs4839 | repressor CpxP                                                                | 4905780 | 501  |
| ECs4840 | ferrous iron efflux protein F                                                 | 4906429 | 903  |
| ECs4842 | sulfate transporter subunit                                                   | 4908793 | 990  |
| ECs4844 | triosephosphate isomerase                                                     | 4910699 | 768  |
| ECs4845 | hypothetical protein                                                          | 4911574 | 600  |
| ECs4846 | hypothetical protein                                                          | 4912274 | 441  |
| ECs4848 | universal stress protein UspD                                                 | 4913252 | 429  |
| ECs4849 | ferredoxin-NADP reductase                                                     | 4913685 | 747  |
| ECs4850 | fructose 1,6-bisphosphatase II                                                | 4914528 | 1011 |
| ECs4856 | ribonuclease activity regulator protein RraA                                  | 4920337 | 486  |
| ECs4857 | 1,4-dihydroxy-2-naphthoate octaprenyltransferase                              | 4920915 | 927  |
| ECs4858 | ATP-dependent protease ATP-binding protein HslU                               | 4921908 | 1332 |
| ECs4859 | ATP-dependent protease peptidase subunit                                      | 4923249 | 531  |
| ECs4863 | 50S ribosomal protein L31                                                     | 4928505 | 213  |
| ECs4867 | transcriptional repressor protein MetJ                                        | 4934960 | 318  |
| ECs4868 | cystathionine gamma-synthase                                                  | 4935554 | 1161 |
| ECs4869 | bifunctional aspartate kinase II/homoserine dehydrogenase II                  | 4936717 | 2433 |
| ECs4870 | 5,10-methylenetetrahydrofolate reductase                                      | 4939498 | 891  |
| ECs4871 | hydroperoxidase HPI(I)                                                        | 4940717 | 2181 |
| ECs4873 | hypothetical protein                                                          | 4943923 | 618  |
| ECs4874 | glycerol dehydrogenase                                                        | 4944814 | 1104 |

|         |                                                                                           |         |      |
|---------|-------------------------------------------------------------------------------------------|---------|------|
| ECs4875 | fructose-6-phosphate aldolase                                                             | 4945928 | 663  |
| ECs4876 | hypothetical protein                                                                      | 4948712 | 492  |
| ECs4879 | PTS system fructose-like transporter subunit EIIB                                         | 4950506 | 321  |
| ECs4880 | formate acetyltransferase 2                                                               | 4950877 | 2298 |
| ECs4881 | pyruvate formate lyase II activase                                                        | 4953179 | 840  |
| ECs4882 | fructose-like phosphotransferase EIIB subunit 3                                           | 4954020 | 342  |
| ECs4883 | AraC family transcriptional regulator                                                     | 4954348 | 852  |
| ECs4884 | hypothetical protein                                                                      | 4955414 | 1734 |
| ECs4885 | phosphoenolpyruvate carboxylase                                                           | 4957330 | 2652 |
| ECs4886 | acetylornithine deacetylase                                                               | 4960333 | 1152 |
| ECs4887 | N-acetyl-gamma-glutamyl-phosphate reductase                                               | 4961638 | 1005 |
| ECs4888 | acetylglutamate kinase                                                                    | 4962653 | 774  |
| ECs4889 | argininosuccinate lyase                                                                   | 4963487 | 1374 |
| ECs4890 | DNA-binding transcriptional regulator OxyR                                                | 4965127 | 918  |
| ECs4895 | hypothetical protein                                                                      | 4971036 | 360  |
| ECs4896 | tRNA (uracil-5-)-methyltransferase                                                        | 4971435 | 1101 |
| ECs4898 | glutamate racemase                                                                        | 4974693 | 858  |
| ECs4899 | UDP-N-acetylenolpyruvoylglucosamine reductase                                             | 4981074 | 1029 |
| ECs4900 | biotin--protein ligase                                                                    | 4982099 | 966  |
| ECs4901 | pantothenate kinase                                                                       | 4983093 | 951  |
| ECs4904 | preprotein translocase subunit SecE                                                       | 4986375 | 384  |
| ECs4905 | transcription antitermination protein NusG                                                | 4986760 | 546  |
| ECs4906 | 50S ribosomal protein L11                                                                 | 4987464 | 429  |
| ECs4907 | 50S ribosomal protein L1                                                                  | 4987896 | 705  |
| ECs4909 | 50S ribosomal protein L7/L12                                                              | 4989456 | 366  |
| ECs4910 | DNA-directed RNA polymerase subunit beta                                                  | 4990141 | 4029 |
| ECs4911 | DNA-directed RNA polymerase subunit beta'                                                 | 4994246 | 4224 |
| ECs4913 | thiamine biosynthesis protein ThiH                                                        | 4999560 | 1134 |
| ECs4914 | thiazole synthase                                                                         | 5000690 | 771  |
| ECs4915 | thiamine biosynthesis protein ThiF                                                        | 5001646 | 756  |
| ECs4916 | thiamine-phosphate pyrophosphorylase                                                      | 5002394 | 636  |
| ECs4917 | thiamine biosynthesis protein ThiC                                                        | 5003029 | 1896 |
| ECs4918 | anti-RNA polymerase sigma 70 factor                                                       | 5005157 | 477  |
| ECs4919 | NADH pyrophosphatase                                                                      | 5005728 | 774  |
| ECs4920 | uroporphyrinogen decarboxylase                                                            | 5006541 | 1065 |
| ECs4921 | endonuclease V                                                                            | 5007615 | 672  |
| ECs4922 | hypothetical protein                                                                      | 5008329 | 591  |
| ECs4923 | transcriptional regulator HU subunit alpha                                                | 5009106 | 273  |
| ECs4924 | hypothetical protein                                                                      | 5009391 | 696  |
| ECs4925 | zinc resistance protein                                                                   | 5010088 | 426  |
| ECs4927 | transcriptional regulatory protein ZraR                                                   | 5012124 | 1326 |
| ECs4928 | phosphoribosylamine--glycine ligase                                                       | 5013446 | 1290 |
| ECs4929 | bifunctional phosphoribosylaminoimidazolecarboxamide formyltransferase/IMP cyclohydrolase | 5014747 | 1590 |
| ECs4931 | homoserine O-succinyltransferase                                                          | 5022680 | 930  |
| ECs4932 | malate synthase                                                                           | 5023878 | 1602 |
| ECs4933 | isocitrate lyase                                                                          | 5025509 | 1305 |
| ECs4936 | lclR family transcriptional regulator                                                     | 5031205 | 825  |
| ECs4937 | B12-dependent methionine synthase                                                         | 5032229 | 3684 |
| ECs4939 | peptidase E                                                                               | 5037854 | 690  |
| ECs5005 | 23S rRNA pseudouridine synthase F                                                         | 5083746 | 873  |
| ECs5007 | aspartate kinase                                                                          | 5085144 | 1350 |
| ECs5008 | glucose-6-phosphate isomerase                                                             | 5087018 | 1650 |
| ECs5010 | hypothetical protein                                                                      | 5089536 | 639  |
| ECs5011 | hypothetical protein                                                                      | 5090171 | 738  |
| ECs5012 | hypothetical protein                                                                      | 5090908 | 2097 |
| ECs5013 | phosphate-starvation-inducible protein PsiE                                               | 5093599 | 411  |
| ECs5015 | maltose transporter permease                                                              | 5095900 | 891  |
| ECs5017 | maltose ABC transporter periplasmic protein                                               | 5098503 | 1191 |
| ECs5018 | maltose/maltodextrin transporter ATP-binding protein                                      | 5100058 | 1116 |
| ECs5019 | maltoporin                                                                                | 5101245 | 1341 |
| ECs5022 | chorismate pyruvate lyase                                                                 | 5105688 | 498  |
| ECs5023 | 4-hydroxybenzoate octaprenyltransferase                                                   | 5106198 | 873  |
| ECs5024 | glycerol-3-phosphate acyltransferase                                                      | 5107225 | 2424 |
| ECs5025 | diacylglycerol kinase                                                                     | 5109819 | 369  |
| ECs5026 | LexA repressor                                                                            | 5110297 | 609  |
| ECs5028 | stress-response protein                                                                   | 5112419 | 210  |
| ECs5029 | zinc uptake transcriptional repressor                                                     | 5112670 | 516  |
| ECs5032 | phage shock protein G                                                                     | 5115994 | 243  |
| ECs5036 | aromatic amino acid aminotransferase                                                      | 5120268 | 1194 |
| ECs5038 | hypothetical protein                                                                      | 5123384 | 417  |
| ECs5039 | hypothetical protein                                                                      | 5123804 | 357  |
| ECs5040 | excinuclease ABC subunit A                                                                | 5124195 | 2823 |
| ECs5041 | single-stranded DNA-binding protein                                                       | 5127272 | 537  |
| ECs5043 | hypothetical protein                                                                      | 5128617 | 1587 |
| ECs5044 | DNA-binding transcriptional regulator SoxS                                                | 5130206 | 324  |
| ECs5045 | redox-sensitive transcriptional activator SoxR                                            | 5130615 | 465  |
| ECs5046 | hypothetical protein                                                                      | 5131625 | 1350 |

|         |                                                          |         |      |
|---------|----------------------------------------------------------|---------|------|
| ECs5047 | hypothetical protein                                     | 5133125 | 1650 |
| ECs5049 | acetate permease                                         | 5136401 | 1650 |
| ECs5050 | hypothetical protein                                     | 5138047 | 315  |
| ECs5051 | acetyl-CoA synthetase                                    | 5138562 | 1959 |
| ECs5053 | cytochrome c nitrite reductase pentaheme subunit         | 5142388 | 573  |
| ECs5054 | NrfC                                                     | 5142957 | 672  |
| ECs5055 | hypothetical protein                                     | 5143625 | 957  |
| ECs5057 | formate-dependent nitrite reductase complex subunit NrfF | 5146312 | 384  |
| ECs5058 | formate-dependent nitrite reductase complex subunit NrfG | 5146692 | 597  |
| ECs5059 | glutamate/aspartate:proton symporter                     | 5147630 | 1314 |
| ECs5064 | multidrug resistance protein MdtN                        | 5155763 | 1032 |
| ECs5065 | hypothetical protein                                     | 5156813 | 276  |
| ECs5077 | ribose 1,5-bisphosphokinase                              | 5170380 | 558  |
| ECs5078 | protein PhnM                                             | 5170937 | 1137 |
| ECs5079 | phosphonate ABC transporter ATP-binding protein          | 5172070 | 681  |
| ECs5080 | phosphonate C-P lyase system protein PhnK                | 5172861 | 759  |
| ECs5081 | protein PhnJ                                             | 5173616 | 846  |
| ECs5082 | protein PhnI                                             | 5174454 | 1065 |
| ECs5083 | carbon-phosphorus lyase complex subunit                  | 5175518 | 585  |
| ECs5084 | protein PhnG                                             | 5176099 | 453  |
| ECs5085 | phosphonate metabolism transcriptional regulator PhnF    | 5176552 | 726  |
| ECs5087 | periplasmic binding protein component of Pn transporter  | 5178183 | 1017 |
| ECs5089 | hypothetical protein                                     | 5180145 | 444  |
| ECs5090 | hypothetical protein                                     | 5180847 | 336  |
| ECs5091 | hypothetical protein                                     | 5181584 | 2229 |
| ECs5092 | hypothetical protein                                     | 5183809 | 879  |
| ECs5094 | sensor protein BasS/PmrB                                 | 5186630 | 1092 |
| ECs5095 | DNA-binding transcriptional regulator BasR               | 5187731 | 669  |
| ECs5097 | arginine:agmatin antiporter                              | 5190143 | 1338 |
| ECs5098 | AraC family transcriptional regulator                    | 5191617 | 762  |
| ECs5099 | biodegradative arginine decarboxylase                    | 5192703 | 2271 |
| ECs5100 | DNA-binding transcriptional regulator MeiR               | 5195169 | 909  |
| ECs5101 | alpha-galactosidase                                      | 5196360 | 1356 |
| ECs5103 | hypothetical protein                                     | 5199378 | 630  |
| ECs5104 | fumarase B                                               | 5200130 | 1647 |
| ECs5105 | anaerobic C4-dicarboxylate transporter                   | 5201854 | 1341 |
| ECs5106 | DcuR family transcriptional regulator                    | 5203765 | 720  |
| ECs5107 | sensory histidine kinase DcuS                            | 5204481 | 1632 |
| ECs5108 | hypothetical protein                                     | 5206293 | 231  |
| ECs5109 | hypothetical protein                                     | 5206535 | 273  |
| ECs5110 | hypothetical protein                                     | 5207034 | 297  |
| ECs5116 | transcriptional regulator                                | 5217184 | 600  |
| ECs5117 | thiol:disulfide interchange protein                      | 5217796 | 1698 |
| ECs5118 | divalent-cation tolerance protein CutA                   | 5219469 | 339  |
| ECs5120 | aspartate ammonia-lyase                                  | 5221342 | 1437 |
| ECs5121 | FxsA protein                                             | 5223115 | 477  |
| ECs5122 | hypothetical protein                                     | 5223607 | 1257 |
| ECs5123 | co-chaperonin GroES                                      | 5225139 | 294  |
| ECs5124 | molecular chaperone GroEL                                | 5225476 | 1647 |
| ECs5125 | hypothetical protein                                     | 5227227 | 387  |
| ECs5127 | hypothetical protein                                     | 5228910 | 1029 |
| ECs5128 | elongation factor P                                      | 5229980 | 567  |
| ECs5130 | outer membrane lipoprotein Blc                           | 5231470 | 534  |
| ECs5132 | fumarate reductase subunit D                             | 5233287 | 360  |
| ECs5133 | fumarate reductase subunit C                             | 5233657 | 396  |
| ECs5134 | fumarate reductase iron-sulfur subunit                   | 5234063 | 735  |
| ECs5136 | lysyl-tRNA synthetase                                    | 5236923 | 978  |
| ECs5138 | hypothetical protein                                     | 5239772 | 3324 |
| ECs5139 | phosphatidylserine decarboxylase                         | 5243117 | 969  |
| ECs5140 | ribosome-associated GTPase                               | 5244182 | 1053 |
| ECs5141 | oligoribonuclease                                        | 5245329 | 546  |
| ECs5143 | hypothetical protein                                     | 5246653 | 1140 |
| ECs5144 | ATPase                                                   | 5249310 | 462  |
| ECs5145 | N-acetylmuramoyl-L-alanine amidase II                    | 5249790 | 1338 |
| ECs5146 | DNA mismatch repair protein                              | 5251137 | 1848 |
| ECs5148 | RNA-binding protein Hfq                                  | 5254013 | 309  |
| ECs5149 | GTPase HflX                                              | 5254398 | 1281 |
| ECs5150 | FtsH protease regulator HflK                             | 5255764 | 1260 |
| ECs5152 | hypothetical protein                                     | 5258112 | 198  |
| ECs5154 | transcriptional repressor NsrR                           | 5259916 | 426  |
| ECs5162 | synthetase/amidase                                       | 5266755 | 1164 |
| ECs5163 | isovaleryl CoA dehydrogenase                             | 5267987 | 1641 |
| ECs5164 | hypothetical protein                                     | 5269744 | 288  |
| ECs5165 | biofilm stress and motility protein A                    | 5270168 | 330  |
| ECs5167 | transcriptional repressor UlaR                           | 5271425 | 756  |
| ECs5168 | L-ascorbate 6-phosphate lactonase                        | 5272288 | 1071 |
| ECs5169 | PTS system ascorbate-specific transporter subunit IIC    | 5273707 | 1398 |

|         |                                                                             |         |      |
|---------|-----------------------------------------------------------------------------|---------|------|
| ECs5170 | PTS system L-ascorbate-specific transporter subunit IIB                     | 5275120 | 306  |
| ECs5171 | PTS system L-ascorbate-specific transporter subunit IIA                     | 5275435 | 465  |
| ECs5172 | 3-keto-L-gulonate-6-phosphate decarboxylase                                 | 5275913 | 651  |
| ECs5173 | L-xylulose 5-phosphate 3-epimerase                                          | 5276573 | 855  |
| ECs5174 | L-ribulose-5-phosphate 4-epimerase                                          | 5277427 | 687  |
| ECs5175 | hypothetical protein                                                        | 5278242 | 276  |
| ECs5176 | 30S ribosomal protein S6                                                    | 5278844 | 396  |
| ECs5177 | primosomal replication protein N                                            | 5279246 | 315  |
| ECs5178 | 30S ribosomal protein S18                                                   | 5279565 | 228  |
| ECs5179 | 50S ribosomal protein L9                                                    | 5279834 | 450  |
| ECs5185 | peptidyl-prolyl cis-trans isomerase                                         | 5284409 | 621  |
| ECs5187 | iron-sulfur cluster repair di-iron protein                                  | 5286795 | 663  |
| ECs5188 | transmembrane subunit                                                       | 5287565 | 975  |
| ECs5189 | hypothetical protein                                                        | 5289587 | 381  |
| ECs5190 | oxidoreductase                                                              | 5288638 | 861  |
| ECs5192 | adenosine-3'(2'),5'-bisphosphate nucleotidase                               | 5292218 | 741  |
| ECs5195 | hypothetical protein                                                        | 5295011 | 246  |
| ECs5196 | transporter                                                                 | 5295352 | 1344 |
| ECs5197 | methionine sulfoxide reductase A                                            | 5297018 | 639  |
| ECs5198 | hypothetical protein                                                        | 5297862 | 1734 |
| ECs5199 | hypothetical protein                                                        | 5299592 | 3780 |
| ECs5200 | hypothetical protein                                                        | 5303374 | 342  |
| ECs5204 | inorganic pyrophosphatase                                                   | 5304602 | 531  |
| ECs5205 | LACI-type transcriptional regulator                                         | 5305442 | 957  |
| ECs5207 | transport system permease                                                   | 5308051 | 1026 |
| ECs5208 | ABC transporter permease                                                    | 5309087 | 972  |
| ECs5209 | fructose-1,6-bisphosphatase                                                 | 5310091 | 999  |
| ECs5210 | UDP-N-acetylmuramate:L-alanyl-gamma-D-glutamyl- meso-diaminopimelate ligase | 5311265 | 1374 |
| ECs5211 | hypothetical protein                                                        | 5312794 | 552  |
| ECs5212 | peptidase PmbA                                                              | 5313439 | 1353 |
| ECs5214 | anaerobic ribonucleotide reductase-activating protein                       | 5315406 | 465  |
| ECs5215 | anaerobic ribonucleoside triphosphate reductase                             | 5316060 | 2139 |
| ECs5216 | trehalose-6-phosphate hydrolase                                             | 5318592 | 1656 |
| ECs5218 | trehalose repressor                                                         | 5321837 | 948  |
| ECs5219 | magnesium-transporting ATPase MgtA                                          | 5323163 | 2697 |
| ECs5220 | hypothetical protein                                                        | 5326065 | 426  |
| ECs5221 | aspartate carbamoyltransferase                                              | 5326524 | 462  |
| ECs5222 | aspartate carbamoyltransferase                                              | 5326998 | 936  |
| ECs5224 | pyrBI operon leader peptide                                                 | 5327937 | 135  |
| ECs5232 | hypothetical protein                                                        | 5333970 | 417  |
| ECs5235 | valyl-tRNA synthetase                                                       | 5336379 | 2856 |
| ECs5236 | DNA polymerase III subunit chi                                              | 5339234 | 444  |
| ECs5237 | leucyl aminopeptidase                                                       | 5340031 | 1512 |
| ECs5238 | hypothetical protein                                                        | 5341809 | 1101 |
| ECs5239 | hypothetical protein                                                        | 5342909 | 1083 |
| ECs5241 | oxidoreductase                                                              | 5345784 | 1020 |
| ECs5281 | mannonate dehydratase                                                       | 5406458 | 1185 |
| ECs5282 | D-mannonate oxidoreductase                                                  | 5407723 | 1461 |
| ECs5283 | DNA-binding transcriptional repressor UxuR                                  | 5409398 | 774  |
| ECs5286 | isoaspartyl dipeptidase                                                     | 5413176 | 1173 |
| ECs5287 | hypothetical protein                                                        | 5414361 | 462  |
| ECs5297 | hypothetical protein                                                        | 5427047 | 768  |
| ECs5298 | hypothetical protein                                                        | 5427824 | 1152 |
| ECs5299 | hypothetical protein                                                        | 5429091 | 1272 |
| ECs5311 | GTP-binding protein YjiA                                                    | 5445573 | 957  |
| ECs5312 | hypothetical protein                                                        | 5446540 | 204  |
| ECs5313 | carbon starvation protein                                                   | 5446793 | 2166 |
| ECs5315 | methyl-accepting chemotaxis protein I                                       | 5450007 | 1665 |
| ECs5318 | oxidoreductase                                                              | 5454334 | 1038 |
| ECs5319 | phosphoglycerol transferase I                                               | 5455508 | 2292 |
| ECs5320 | hypothetical protein                                                        | 5458053 | 498  |
| ECs5321 | DNA replication protein DnaC                                                | 5458596 | 738  |
| ECs5322 | primosomal protein Dnal                                                     | 5459336 | 540  |
| ECs5323 | hypothetical protein                                                        | 5459982 | 474  |
| ECs5324 | structural protein                                                          | 5460446 | 825  |
| ECs5327 | ferric hydroximate transport ferric iron reductase                          | 5463235 | 789  |
| ECs5329 | 16S ribosomal RNA m2G1207 methyltransferase                                 | 5464715 | 1032 |
| ECs5330 | DNA polymerase III subunit psi                                              | 5465849 | 414  |
| ECs5331 | ribosomal-protein-alanine N-acetyltransferase                               | 5466231 | 447  |
| ECs5332 | nucleotidase                                                                | 5466692 | 678  |
| ECs5334 | hypothetical protein                                                        | 5469442 | 606  |
| ECs5335 | hypothetical protein                                                        | 5470457 | 1074 |
| ECs5337 | activating enzyme                                                           | 5472523 | 864  |
| ECs5340 | deoxyribose-phosphate aldolase                                              | 5475165 | 780  |
| ECs5341 | thymidine phosphorylase                                                     | 5476199 | 1194 |
| ECs5342 | phosphopentomutase                                                          | 5477444 | 1224 |
| ECs5343 | purine nucleoside phosphorylase                                             | 5478724 | 720  |

|         |                                                        |         |      |
|---------|--------------------------------------------------------|---------|------|
| ECs5345 | unknown domain/lipoate-protein ligase A fusion protein | 5479899 | 1689 |
| ECs5346 | phosphoserine phosphatase                              | 5481693 | 969  |
| ECs5347 | DNA repair protein RadA                                | 5482710 | 1383 |
| ECs5348 | nicotinamide-nucleotide adenylyltransferase            | 5484113 | 1233 |
| ECs5349 | ABC transporter ATP-binding protein                    | 5485653 | 1668 |
| ECs5350 | lytic murein transglycosylase                          | 5487531 | 1938 |
| ECs5351 | Trp operon repressor                                   | 5489558 | 327  |
| ECs5352 | NTPase                                                 | 5490031 | 513  |
| ECs5353 | phosphoglycerate mutase                                | 5490595 | 648  |
| ECs5354 | right origin-binding protein                           | 5491239 | 870  |
| ECs5355 | hypothetical protein                                   | 5492319 | 474  |
| ECs5356 | DNA-binding response regulator CreB                    | 5492805 | 690  |
| ECs5359 | two-component response regulator                       | 5496388 | 717  |
| ECs5365 | hypothetical protein                                   | 217269  | 219  |
| ECs5381 | hypothetical protein                                   | 695598  | 219  |
| ECs5382 | hypothetical protein                                   | 713651  | 198  |
| ECs5391 | hypothetical protein                                   | 858702  | 114  |
| ECs5432 | hypothetical protein                                   | 1845142 | 174  |
| ECs5439 | hypothetical protein                                   | 1978560 | 267  |
| ECs5463 | hypothetical protein                                   | 2510779 | 216  |
| ECs5464 | hypothetical protein                                   | 2588660 | 252  |
| ECs5486 | hypothetical protein                                   | 3103070 | 336  |
| ECs5495 | hypothetical protein                                   | 3252320 | 219  |
| ECs5496 | hypothetical protein                                   | 3308886 | 201  |
| ECs5497 | hypothetical protein                                   | 3345262 | 153  |
| ECs5498 | hypothetical protein                                   | 3396071 | 225  |
| ECs5530 | hypothetical protein                                   | 4173443 | 219  |
| ECs5532 | hypothetical protein                                   | 4198498 | 201  |
| ECs5536 | hypothetical protein                                   | 4471583 | 300  |
| ECs5537 | hypothetical protein                                   | 4564893 | 258  |
| ECs5549 | hypothetical protein                                   | 4761092 | 219  |
| ECs5556 | hypothetical protein                                   | 4788180 | 204  |
| ECs5575 | sulfur carrier protein ThiS                            | 5001462 | 201  |
| ECs5586 | entericidin B membrane lipoprotein                     | 5230834 | 147  |
| ECs5596 | TrpR binding protein WrbA                              | 1245465 | 546  |

---
