# Supplementary material
Source: PubMed Central journal article supplement (PMC4844722)
Supplement: JCM.02897-15_zjm999094965so2.pdf [file JCM.02897-15_zjm999094965so2.pdf]

**Table S2. List of the 100 genes of the rfbO157 region analyzed.** The locus tag of the reference sequence of *E. coli* O157:H7 strain Sakai (GenBank accession number NC\_002695), the gene product, the absolute position in the genome, and the gene length in bp were given.

| <b>Locus tag</b> | <b>Product</b>                                                                                      | <b>Genome localization in strain Sakai (NC_002695)</b> | <b>Gene length in bp</b> |
|------------------|-----------------------------------------------------------------------------------------------------|--------------------------------------------------------|--------------------------|
| ECs2809          | hypothetical protein                                                                                | 2751538                                                | 330                      |
| ECs2810          | hypothetical protein                                                                                | 2752039                                                | 1059                     |
| ECs2811          | DNA gyrase inhibitor                                                                                | 2753296                                                | 474                      |
| ECs2812          | D-alanyl-D-alanine carboxypeptidase                                                                 | 2753888                                                | 1173                     |
| ECs2813          | exonuclease I                                                                                       | 2755263                                                | 1428                     |
| ECs2816          | amino acid/amine transport protein                                                                  | 2758211                                                | 1365                     |
| ECs2817          | LysR family transcriptional regulator                                                               | 2759836                                                | 930                      |
| ECs2818          | hypothetical protein                                                                                | 2760811                                                | 825                      |
| ECs2820          | ATP phosphoribosyltransferase                                                                       | 2762257                                                | 900                      |
| ECs2821          | histidinol dehydrogenase                                                                            | 2763162                                                | 1305                     |
| ECs2822          | histidinol-phosphate aminotransferase                                                               | 2764463                                                | 1071                     |
| ECs2823          | imidazole glycerol-phosphate dehydratase/histidinol phosphatase                                     | 2765533                                                | 1068                     |
| ECs2824          | imidazole glycerol phosphate synthase subunit HisH                                                  | 2766600                                                | 591                      |
| ECs2825          | 1-(5-phosphoribosyl)-5-[(5- phosphoribosylamino)methylideneamino] imidazole-4-carboxamide isomerase | 2767190                                                | 738                      |
| ECs2826          | imidazole glycerol phosphate synthase subunit HisF                                                  | 2767909                                                | 777                      |
| ECs2827          | bifunctional phosphoribosyl-AMP cyclohydrolase/phosphoribosyl-ATP pyrophosphatase                   | 2768679                                                | 612                      |
| ECs2829          | UDP-glucose 6-dehydrogenase                                                                         | 2770510                                                | 1167                     |
| ECs2830          | 6-phosphogluconate dehydrogenase                                                                    | 2771925                                                | 1407                     |
| ECs2831          | acetyltransferase                                                                                   | 2773532                                                | 666                      |
| ECs2833          | H repeat-containing protein                                                                         | 2774427                                                | 165                      |
| ECs2836          | mannose-1-phosphate guanylyltransferase                                                             | 2776834                                                | 1449                     |
| ECs2837          | GDP-L-fucose pathway enzyme                                                                         | 2778264                                                | 510                      |
| ECs2838          | fucose synthetase                                                                                   | 2778776                                                | 966                      |
| ECs2839          | GDP-D-mannose dehydratase                                                                           | 2779744                                                | 1119                     |
| ECs5479          | hypothetical protein                                                                                | 2780370                                                | 231                      |
| ECs2840          | glycosyl transferase family protein                                                                 | 2780882                                                | 1215                     |
| ECs2841          | perosamine synthetase                                                                               | 2782121                                                | 1101                     |
| ECs2842          | O antigen flippase                                                                                  | 2783218                                                | 1386                     |
| ECs2843          | glycosyl transferase family protein                                                                 | 2784596                                                | 747                      |
| ECs2844          | O antigen polymerase                                                                                | 2785311                                                | 1185                     |

|         |                                                   |         |      |
|---------|---------------------------------------------------|---------|------|
| ECs2845 | glycosyl transferase family protein               | 2786492 | 783  |
| ECs2846 | UTP-glucose-1-phosphate uridylyltransferase       | 2787593 | 894  |
| ECs2847 | UDP-galactose 4-epimerase                         | 2788729 | 996  |
| ECs2848 | colanic acid biosynthesis protein                 | 2789882 | 1395 |
| ECs2849 | colanic acid biosynthesis glycosyl transferase    | 2791287 | 1221 |
| ECs2850 | pyruvyl transferase                               | 2792504 | 1281 |
| ECs2851 | colanic acid exporter                             | 2793964 | 1479 |
| ECs2852 | UDP-glucose lipid carrier transferase             | 2795444 | 1395 |
| ECs2854 | mannose-1-phosphate guanylyltransferase           | 2798456 | 1437 |
| ECs2855 | glycosyl transferase family protein               | 2799895 | 1224 |
| ECs2856 | GDP-mannose mannosyl hydrolase                    | 2801115 | 483  |
| ECs2857 | GDP-fucose synthetase chain A                     | 2801597 | 966  |
| ECs2858 | GDP-D-mannose dehydratase                         | 2802565 | 1122 |
| ECs2859 | colanic acid biosynthesis acetyltransferase WcaF  | 2803715 | 549  |
| ECs2860 | glycosyl transferase family protein               | 2804279 | 747  |
| ECs2862 | glycosyl transferase family protein               | 2806228 | 1218 |
| ECs2863 | colanic acid biosynthesis acetyltransferase WcaB  | 2807442 | 489  |
| ECs2864 | glycosyl transferase family protein               | 2807933 | 840  |
| ECs2865 | tyrosine kinase                                   | 2808865 | 2163 |
| ECs2866 | tyrosine phosphatase                              | 2811030 | 444  |
| ECs2867 | polysaccharide export protein                     | 2811479 | 1140 |
| ECs2868 | transporter                                       | 2813277 | 1584 |
| ECs2871 | assembly protein                                  | 2815606 | 1854 |
| ECs2872 | deoxycytidine triphosphate deaminase              | 2817481 | 582  |
| ECs2873 | uridine kinase                                    | 2818154 | 642  |
| ECs2878 | chaperone                                         | 2823515 | 1353 |
| ECs2879 | chaperonin                                        | 2824880 | 1941 |
| ECs2880 | hypothetical protein                              | 2826817 | 762  |
| ECs2881 | hypothetical protein                              | 2827575 | 660  |
| ECs2882 | multidrug efflux system subunit MdtA              | 2829450 | 1248 |
| ECs2883 | multidrug efflux system subunit MdtB              | 2830697 | 3123 |
| ECs2884 | multidrug efflux system subunit MdtC              | 2833820 | 3078 |
| ECs2885 | multidrug efflux system protein MdtE              | 2836898 | 1416 |
| ECs2886 | signal transduction histidine-protein kinase BaeS | 2838310 | 1404 |
| ECs2887 | BaeR family transcriptional regulator             | 2839710 | 723  |
| ECs2888 | hypothetical protein                              | 2840623 | 333  |

|         |                                                        |         |      |
|---------|--------------------------------------------------------|---------|------|
| ECs2889 | hypothetical protein                                   | 2841103 | 1362 |
| ECs2892 | lipid kinase                                           | 2843517 | 900  |
| ECs2893 | split galactitol utilization operon repressor          | 2844498 | 780  |
| ECs2894 | galactitol-1-phosphate dehydrogenase                   | 2845377 | 1041 |
| ECs2895 | PTS system galactitol-specific enzyme IIC              | 2846465 | 1356 |
| ECs2897 | PTS system galactitol-specific transporter subunit IIA | 2848139 | 453  |
| ECs2898 | tagatose 6-phosphate kinase 1                          | 2848601 | 1263 |
| ECs2899 | tagatose-bisphosphate aldolase                         | 2849892 | 855  |
| ECs2900 | fructose-bisphosphate aldolase                         | 2851045 | 1053 |
| ECs2901 | nucleoside permease                                    | 2852354 | 1278 |
| ECs2902 | hypothetical protein                                   | 2853628 | 1005 |
| ECs2903 | kinase                                                 | 2854629 | 966  |
| ECs2904 | transcriptional regulator                              | 2855568 | 747  |
| ECs2905 | hypothetical protein                                   | 2856366 | 828  |
| ECs2906 | phosphomethylpyrimidine kinase                         | 2857249 | 801  |
| ECs2907 | hydroxyethylthiazole kinase                            | 2858046 | 789  |
| ECs2911 | hypothetical protein                                   | 2861239 | 273  |
| ECs2913 | hypothetical protein                                   | 2862689 | 339  |
| ECs2919 | ATPase                                                 | 2868789 | 1110 |
| ECs2930 | hypothetical protein                                   | 2887641 | 1137 |
| ECs2934 | hypothetical protein                                   | 2892203 | 474  |
| ECs2935 | hypothetical protein                                   | 2892718 | 471  |
| ECs2936 | two-component response-regulatory protein YehT         | 2893235 | 720  |
| ECs2937 | 2-component sensor protein                             | 2893951 | 1686 |
| ECs3014 | transcriptional regulator                              | 2943822 | 648  |
| ECs3015 | transport system permease                              | 2944617 | 732  |
| ECs3016 | ABC transporter ATP-binding protein                    | 2945353 | 927  |
| ECs3017 | transport system permease                              | 2946272 | 1158 |
| ECs3018 | transport system permease                              | 2947436 | 918  |
| ECs3019 | beta-D-glucoside glucohydrolase                        | 2948605 | 2298 |
| ECs3020 | D-lactate dehydrogenase                                | 2951098 | 1716 |
| ECs3021 | D-alanyl-D-alanine endopeptidase                       | 2952851 | 942  |
| ECs3022 | hypothetical protein                                   | 2953957 | 612  |
| ECs3023 | hypothetical protein                                   | 2954678 | 615  |

---
